# Supplementary material for: Statin use and risk of liver cancer: an update meta-analysis
Source: PubMed Central journal article supplement — BMJ Open. 2014 Sep 16;4(9):e005399. doi: 10.1136/bmjopen-2014-005399 (PMC4166249; doi:10.1136/bmjopen-2014-005399), 2014-09-16
Supplement: bmjopen-2014-005399.draft_revisions.pdf [file bmjopen-2014-005399.draft_revisions.pdf]

# BMJ Open

## Statin use and risk of liver cancer: an update meta-analysis

|                                 |                                                                                                                                                                                                                                                                                                                                                                                       |
|---------------------------------|---------------------------------------------------------------------------------------------------------------------------------------------------------------------------------------------------------------------------------------------------------------------------------------------------------------------------------------------------------------------------------------|
| Journal:                        | <i>BMJ Open</i>                                                                                                                                                                                                                                                                                                                                                                       |
| Manuscript ID:                  | bmjopen-2014-005399                                                                                                                                                                                                                                                                                                                                                                   |
| Article Type:                   | Research                                                                                                                                                                                                                                                                                                                                                                              |
| Date Submitted by the Author:   | 04-Apr-2014                                                                                                                                                                                                                                                                                                                                                                           |
| Complete List of Authors:       | Shi, Meng; Nanfang Hospital, Southern Medical University, Department of Gastroenterology<br>Zheng, Huiling; Nanfang Hospital, Southern Medical University, Department of Gastroenterology<br>Gong, Wei; Nanfang Hospital, Southern Medical University, Department of Gastroenterology<br>Cui, Xiaobing; Nanfang Hospital, Southern Medical University, Department of Gastroenterology |
| <b>Primary Subject Heading</b>: | Epidemiology                                                                                                                                                                                                                                                                                                                                                                          |
| Secondary Subject Heading:      | Epidemiology, Gastroenterology and hepatology, Oncology                                                                                                                                                                                                                                                                                                                               |
| Keywords:                       | Gastrointestinal tumours < GASTROENTEROLOGY, Epidemiology < ONCOLOGY, Hepatobiliary tumours < ONCOLOGY                                                                                                                                                                                                                                                                                |
|                                 |                                                                                                                                                                                                                                                                                                                                                                                       |

SCHOLARONE™  
Manuscripts

Peer Review Only

## Statin use and risk of liver cancer: an update meta-analysis

Meng Shi<sup>1</sup>, Huiling Zheng<sup>1</sup>, Wei Gong<sup>1</sup> and Xiaobing Cui\*

<sup>1</sup>Guangdong Provincial Key Laboratory of Gastroenterology, Department of Gastroenterology, Nanfang Hospital, Southern Medical University, No. 1838 Guangzhou Avenue North, Guangzhou 510515, China

\***Corresponding author:** Dr. Xiaobing Cui, Tel.: +86 13631312723, Fax: +86-20-87280770, E-mail: xbing119@gmail.com.

**Running title:** Meta-analysis: statin and liver cancer

**Key words:** *Statin; Liver cancer; Cancer Prevention; Meta-analysis.*

## Abstract

**Objective:** Statins are commonly prescribed cholesterol-lowering drugs. Preclinical studies suggest that statins may possess cancer preventive properties. The primary objective of this meta-analysis was to determine the association between statin use and risk of liver cancer.

**Design:** Meta-analysis.

**Setting:** International.

**Participants:** A comprehensive literature search of PubMed, BIOSIS Previews, Web of Science, EMBASE, and EBSCO was conducted through March 2014. The effect estimate was reported as pooled relative risk (RR) with 95% confidence intervals (CIs), using the random-effects model. The test of heterogeneity, publication bias and subgroup analyses were also performed.

**Results:** A total of 14 (3 RCT, 5 cohort, and 6 case-control) studies were qualified for the meta-analysis, involving 1,779,630 participants with 35,775 liver cancer cases. Our results indicated a significant risk reduction of liver cancer among all statin users ((RR 0.58, 95% CIs 0.51–0.67). The difference of study design, baseline risk and confounding adjustment can partly explained the significant heterogeneity found in the overall analysis ( $I^2 = 59\%$ ,  $P=0.002$ ). No evidence of publication bias was observed. Similar results were also found in the subgroup of lipophilic statin use (RR 0.57, 0.50–0.65;  $I^2=40\%$ ,  $P=0.13$ ) and higher cumulative dosage of statin use (RR 0.54, 0.38-0.77;  $I^2=85\%$ ,  $P<0.00001$ ).

**Conclusions:** This meta-analysis suggests that there is a significant inverse

1  
2  
3 association between statin use and risk of liver cancer, however, some confounders  
4  
5  
6 might overestimate this preventive effect of statins.  
7

8  
9 **Key words:** *Statin; Liver cancer; Cancer Prevention; Meta-analysis.*

### 10 11 **Strengths and limitations of this study**

12  
13  
14 Statins are commonly prescribed cholesterol-lowering drugs. In this comprehensive  
15  
16 meta-analysis, we demonstrate that the statin use is associated with a significant  
17  
18 reduction of liver cancer risk.  
19

20  
21 The difference of study design, baseline risk and confounding adjustment can partly  
22  
23 explained the significant heterogeneity found in the overall analysis.  
24

25  
26 Some confounders, such as adjust factor of original studies, and indication of statin  
27  
28 use, might overestimate the preventive effect of statins on liver cancer.  
29

30  
31 Further studies are needed to investigate the efficacy of statins in the prevention and  
32  
33 treatment of liver cancer.  
34  
35  
36  
37  
38  
39  
40  
41  
42  
43  
44  
45  
46  
47  
48  
49  
50  
51  
52  
53  
54  
55  
56  
57  
58  
59  
60

## INTRODUCTION

Statins are inhibitors of 3-hydroxy-3-methylglutaryl coenzyme-A (HMG-CoA) reductase and widely used to reduce the plasma cholesterol level and the risk of cardiovascular events.<sup>1</sup> Although there is a concern over their possible carcinogenicity raised in rodent studies,<sup>2</sup> preclinical studies indicate that statins have anticancer properties *in vitro* and *in vivo*, through inhibiting angiogenesis, inducing apoptosis, and suppressing tumor growth and metastasis.<sup>3-5</sup> However, high concentrations are typically required to induce these effects, raising questions concerning the therapeutic relevance of statins with cancer.<sup>6</sup> Meanwhile, there are inconsistent results from clinical studies aiming at determining whether statins indeed reduce the risk of cancer at regular daily doses for cardiovascular event prevention. Moreover, several meta-analyses have indicated that there was no association between statin use and the risk of overall cancer,<sup>7-10</sup> or cancer of breast,<sup>11</sup> stomach,<sup>12</sup> or pancreas.<sup>13</sup> There is only a modest association between the statin use and the risk of prostate cancer<sup>14</sup> and colorectal cancer.<sup>15</sup>

In contrary to previously reported studies, several recent studies reported encouraging benefits for risk reduction of liver cancer among all statin users. Of note, in a previously reported meta-analysis of ten studies, Singh *et al.* found a significant inverse association between the statin use and the risk of hepatocellular carcinoma (HCC).<sup>16</sup> Considering the recently published evidences, the present meta-analysis was designed to further evaluate the association between the statin use and the risk of liver cancer, by a comprehensive literature search and more subgroup analyses based on a

1  
2  
3  
4 large population base. Our results demonstrated the benefits of reducing liver cancer  
5  
6 risk in statin users with regular daily doses for prevention of cardiovascular events,  
7  
8 which may have a significant translational potential in the clinic. However, some  
9  
10 confounders might overestimate this preventive effect of statins.  
11  
12

## 13 **MATERIALS AND METHODS**

### 14 ***Literature Search strategy***

15  
16 This meta-analysis was conducted following the PRISMA guidelines.<sup>17</sup>

17  
18  
19 The systematic computerized search for eligible studies was performed on the  
20  
21 database of PubMed, BIOSIS Previews, Web of Science, EMBASE, and EBSCO,  
22  
23 covering all studies published from their inception to March 5, 2014. The following  
24  
25 terms were searched with both the subjects (MeSH terms) and text-word search  
26  
27 strategies: “(Statin OR HMG-CoA reductase inhibitors OR Atorvastatin OR  
28  
29 Cerivastatin OR Fluvastatin OR Lovastatin OR Pravastatin OR Rosuvastatin OR  
30  
31 Simvastatin) AND (Hepatocellular OR Hepatic OR Intrahepatic OR Interlobular OR  
32  
33 Liver) AND (Carcinoma OR Sarcomas OR Angiosarcoma OR Cancer OR Neoplasm).  
34  
35 Additionally, the relevant reviews and retrieved articles were searched manually for  
36  
37 more eligible studies.  
38  
39  
40  
41  
42  
43  
44  
45

### 46 ***Study selection***

47  
48 The inclusion criteria were: (1) randomized controlled trial (RCTs), cohort studies or  
49  
50 case-control studies; (2) original studies that assessed the effect of statin use on the  
51  
52 risk of liver cancer, compared with placebo or no treatment; and (3) liver cancer cases  
53  
54 were identified according to the International Classification of Diseases codes (ICD).  
55  
56  
57  
58  
59  
60

1  
2  
3  
4 The exclusion criteria were: (1) study design not meeting the inclusion criteria; (2)  
5  
6 studies without estimate of relative risk (risk ratio, RR) of liver cancer, or liver cancer  
7  
8 incidence by statin use status; or (3) studies with duplicated reports.  
9

### 10 11 ***Data extraction***

12  
13  
14 Two independent investigators (M. Shi and X.B. Cui) extracted data from the eligible  
15  
16 studies using a predefined data collection form. The differences of data extraction  
17  
18 were resolved by consensus referring back to the original article. The extracted  
19  
20 information included: (1) Studies: first author, year of publication, study design,  
21  
22 location, patient populations, period, and follow-up; (2) Statins: type, dosage or  
23  
24 duration of statin use; (3) liver cancer: case identification, incidence by statin use  
25  
26 status, crude RR with 95% confidence intervals (CIs), adjusted RR reflecting the  
27  
28 greatest degree of control for potential confounders, and confounders for adjustment  
29  
30 (including variables for matching). When the RR were not available, the RR with 95%  
31  
32 CIs were calculated from the raw data provided.  
33  
34  
35  
36  
37  
38

39 We extracted different measurements of effect estimates from original studies, such as  
40  
41 Relative Risk, Odds Ratio, Hazard Ratio, and Observed/Expected ratio. In this  
42  
43 analysis, these different measurements were found to provide similar estimates of RR,  
44  
45 presumably due to the fact that the incidence of liver cancer was very low in most  
46  
47 studies.  
48  
49

### 50 51 ***Methodological quality assessment***

52  
53  
54 Of note, the included RCTs were pooled analyses or secondary analysis of other RCTs,  
55  
56 therefore, it is inappropriate to assess the methodological quality. The methodological  
57  
58  
59  
60

1  
2  
3  
4 quality of cohort and case-control studies were assessed on the Newcastle-Ottawa  
5  
6 Scale,<sup>18</sup> including eight items that were categorized three categories: selection (three  
7  
8 items, one star each), comparability (one item, up to two stars), and exposure/outcome  
9  
10 (three items, one star each). A “star” presents a “high” quality choice of each items.

### 11 12 13 ***Statistical analysis***

14  
15  
16 The overall meta-analysis was performed first, followed by the subgroup analyses,  
17  
18 based on study design, study location, confounding adjustment, and baseline risk of  
19  
20 liver cancer. Meanwhile, we conducted subgroup analyses based on studies which  
21  
22 reported different RR estimate for use of lipophilic statins and higher cumulative  
23  
24 dosage of statin, when appropriate data were available.

25  
26  
27 To take into account the heterogeneity and provide a more conservative estimate, the  
28  
29 inverse variance method was used to estimate the pooled RR and corresponding 95%  
30  
31 CIs, and data were pooled using a random effects model. Heterogeneity was assessed  
32  
33 using the Chi-squared statistic ( $P$ ) together with the Higgins I-squared statistic ( $I^2$ ).<sup>19</sup>  
34  
35 Test for subgroup differences was carried out to characterize possible sources of  
36  
37 statistical heterogeneity. Publication bias was assessed using the Begg’s test and the  
38  
39 Egger’s test.<sup>20</sup> A  $P$ -values of 0.10 was used to determine statistically significant.  
40  
41  
42 Software Review Manager (RevMan 5.2, Copenhagen) and STATA (Stata 11.2, Texas)  
43  
44 were used for the statistical analysis.  
45  
46  
47  
48  
49

## 50 51 **RESULTS**

### 52 53 ***Study selection***

54  
55  
56 **Figure 1** illustrates the process of study selection for the meta-analysis. Of the 1405  
57  
58  
59  
60



1  
2  
3  
4 potentially relevant references identified by electric and hand search, 142 were  
5  
6 selected for full-text review after screening titles and abstracts. Finally, a total of 14  
7  
8 studies was included, with 3 RCTs,<sup>21-23</sup> 5 cohort studies,<sup>24-28</sup> and 6 case-control  
9  
10 studies.<sup>29-34</sup> Of note, one of the case-control studies was presented solely in abstract  
11  
12 form.<sup>29</sup> For the cohort study conducted by Friedman *et al.*,<sup>25</sup> in which the RR estimate  
13  
14 were reported separately for different gender (male and female), these two reports  
15  
16 were regarded as separate studies in our meta-analysis. Therefore, a total of fifteen  
17  
18 reports were included for the present meta-analysis.  
19  
20  
21  
22

### 23 ***Study characteristics***

24  
25 **Table 1** summarizes the characteristics of qualified studies in this meta-analysis. The  
26  
27 14 studies, involving 1,779,630 participants with 35,775 liver cancer cases, were  
28  
29 published between 2005 and 2013. Except one RCT without identify information,<sup>23</sup>  
30  
31 one cohort adopted ICD-10 C22,<sup>24</sup> all other studies identified liver cancer cases  
32  
33 according to the ICD-9 155.  
34  
35  
36  
37

38  
39 The three “RCTs” in the present study were pooled analyses of other RCTs  
40  
41 (n=33),<sup>21-23</sup> which investigated statins therapy in cardiovascular event prevention and  
42  
43 reported the incidence of liver cancer as adverse event. The observational studies were  
44  
45 all conducted with the local or national health databases, the statin exposure were  
46  
47 identified by linkage to prescription databases, and the controls were matched mainly  
48  
49 by age, sex and index date. Two cohort studies were restricted to specified patients,  
50  
51 such as patients with HBV infection,<sup>27</sup> or HCV infection.<sup>28</sup> One case-control studies  
52  
53 was restricted to patients with diabetes mellitus.<sup>30</sup> Meanwhile, two observational  
54  
55  
56  
57  
58  
59  
60

1  
2  
3 studies were restricted to older patients.<sup>26 31</sup>

4  
5  
6 **Table 2** summarizes the data provided by the included studies. In two RCT<sup>22 23</sup> and  
7  
8 one pre-matched cohort study,<sup>26</sup> in which the RR estimates were not provided by the  
9  
10 original studies, the RR with 95% CIs were calculated from the 2×2 tables defined by  
11  
12 the incidence of liver cancer and the statin use status. Other studies reported different  
13  
14 measurements of RR estimates with adjustment by potential confounders. Only  
15  
16 several observational studies adopted at least 4 important risk factor for adjustments,  
17  
18 such as HBV infection, HCV infection, cirrhosis, non-alcoholic fatty liver disease  
19  
20 (NAFLD), HCV treatment, HBV treatment or anti-diabetic medications.<sup>35</sup> Meanwhile,  
21  
22 only two studies adopted the cholesterol level for adjustments.<sup>26 34</sup>  
23  
24  
25  
26  
27

### 28 *Methodological quality*

29  
30 For the cohort and case-control studies, the median of Newcastle-Ottawa Scale scores  
31  
32 was 7, with a range of 5 to 8 (**Supplementary Table 1**). These results indicated that  
33  
34 the observational studies were in a reasonable good quality.  
35  
36  
37

### 38 *Overall meta-analysis*

39  
40 **Figure 2** depicts the forest plot of RR estimate with 95% CIs from individual studies  
41  
42 and overall meta-analysis. In the overall meta-analysis, pooled results showed a  
43  
44 statistically significant decrease in the liver cancer risk among all statin users (RR  
45  
46 0.58, 95% CIs 0.51–0.67). Of note, a statistically significant heterogeneity was  
47  
48 observed ( $I^2 = 59%$ ,  $P=0.002$ ). The  $P$ -values of Begg's test and Egger's test were  
49  
50 0.921 and 0.716, respectively, both suggesting there were no evidence of publication  
51  
52 bias.  
53  
54  
55  
56  
57  
58  
59  
60

### *Subgroup analyses*

We first performed preplanned subgroup analyses of studies based on study design, study location confounding adjustment, and baseline risk of liver cancer. (**Table 3**).

In RCTs, only a non-significant decrease of liver cancer risk among all statin users was found (RR 0.95, 0.62–1.44;  $I^2=0\%$ ,  $P=0.59$ ). Subgroup analyses of cohort studies found a greater decrease of liver cancer risk than the case-control studies among all statin users (RR 0.51, 0.44–0.58;  $I^2=18\%$ ,  $P=0.30$  and RR 0.63, 0.54–0.73;  $I^2=46\%$ ,  $P=0.10$ , respectively). Test for subgroup differences ( $I^2=79.9\%$ ,  $P=0.007$ ) indicated the study design partly explained the heterogeneity in the overall analysis. (**Figure 2**)

Subgroup analysis of studies with higher baseline risk of liver cancer,<sup>26-28 31</sup> defined as older patients, HBV or HCV infected patients, found a greater decrease of liver cancer risk (RR 0.52, 0.47-0.59;  $I^2=16\%$ ,  $P=0.31$ ) than the studies with general population and other population (RR 0.60, 0.49–0.75;  $I^2=48\%$ ,  $P=0.05$  and RR 0.72, 0.62–0.83;  $I^2=0\%$ ,  $P=0.34$ , respectively). Test for subgroup differences ( $I^2=82.7\%$ ,  $P=0.003$ ) indicated that the difference in baseline risk of liver cancer can partly explained the heterogeneity in the overall analysis (**Supplementary Figure 1**).

Subgroup analysis of studies that adjusted adequately,<sup>21-23 29-32</sup> which defined as RCTs or adjusted for at least 4 of 7 important confounders, found a less decrease of liver cancer risk among all statin users (RR 0.67, 0.55-0.83;  $I^2=47\%$   $P=0.09$ ). Subgroup analysis of studies that adjusted inadequately found a greater decrease of liver cancer risk among all statin users (RR, 0.54, 0.47-0.62;  $I^2=40\%$ ,  $P=0.10$ ).<sup>24-28 33 34</sup> Test for subgroup differences ( $I^2=69.2\%$ ,  $P=0.07$ ) indicated the confounding adjustment also

partly explained the heterogeneity in the overall analysis (**Supplementary Figure 2**).

Then, we conducted subgroup analyses based on studies use lipophilic statins and higher cumulative dosage of statin, when appropriate data were available.

Subgroup analysis based on study location found similar results in Western countries and Asian countries (RR 0.61, 0.49–0.76;  $I^2 = 59\%$ ,  $P=0.01$  and RR 0.55, 0.49–0.63;  $I^2 = 26\%$ ,  $P=0.23$ , respectively). Test for subgroup differences ( $I^2 = 0\%$ ,  $P=0.47$ ) found no significant heterogeneity between these two subgroups (**Supplementary Figure 3**).

Subgroup analysis of studies with use of lipophilic statins, such as atorvastatin, fluvastatin, lovastatin, and simvastatin, was conducted based on the pharmacokinetic data.<sup>23 25 27 30-32</sup> The pooled results indicated a significant decrease of liver cancer risk among users of lipophilic statins (RR 0.57, 0.50–0.65;  $I^2 = 40\%$ ,  $P=0.13$ ). (**Supplementary Figure 4**)

Subgroup analysis of studies with higher cumulative dosage of statin use, defined as cumulative defined daily dose (cDDD) > 180 or cumulative duration of statin use > 0.5 years, also found a significant decrease of liver cancer risk (RR 0.54, 0.38-0.77), but with a high degree of degree of heterogeneity ( $I^2 = 85\%$ ,  $P < 0.00001$ ). (**Supplementary Figure 5**)

## DISCUSSION

This present meta-analysis represents the most comprehensive review to date on the relation between the statin use and the liver cancer risk, by including 14 studies (3 RCTs, 5 cohort studies, and 6 case-control studies) and involving 1,779,630

1  
2  
3  
4 participants with 35,775 liver cancer cases. Overall, we found a significant inverse  
5  
6 association between statin use and risk of liver cancer (RR 0.58, 95% CIs 0.51–0.67),  
7  
8 when statins were taken at daily doses for cardiovascular event prevention. This result  
9  
10 was in line with the previous three meta-analyses that only included some of our  
11  
12 included studies: Singh *et al.* included 10 studies and suggested statin users were less  
13  
14 likely to develop HCC than statin nonusers (Odds Ratios 0.63, 95% CIs 0.52–0.76),<sup>16</sup>  
15  
16 Pradelli *et al.* and Zhang *et al.* included 5 and 7 observational studies and found a  
17  
18 summary RR of 0.58 (95% CIs 0.46–0.74) and 0.61 (95% CIs 0.49–0.76),  
19  
20 respectively.<sup>36 37</sup>

21  
22 The inverse association between the statin use and the liver cancer risk was seen  
23  
24 primarily in observational studies, and which was relative stronger in the cohort  
25  
26 studies than the case-control studies. Subgroup analysis of RCTs only found a  
27  
28 non-significant inverse association, mainly because of the RCTs included low risk  
29  
30 population (Cardiovascular disease patients rather than HBV /HCV infected patients).  
31  
32 Meanwhile, subgroup analysis of studies with higher baseline risk of liver cancer,  
33  
34 found a greater decrease of liver cancer risk than the studies with general population  
35  
36 and other population. These results all indicated that the protective effect of statins  
37  
38 might vary according to different baseline risk.

39  
40 Subgroup analysis of adjusted adequately studies found a less decrease of liver cancer  
41  
42 risk than the adjusted inadequately studies, indicated the potential of overestimate the  
43  
44 preventive effect of statins by inadequately adjustment. On the other hand, there were  
45  
46 inverse association between use of non-statin lipid-lowering drugs and risk of the liver  
47  
48  
49  
50  
51  
52  
53  
54  
55  
56  
57  
58  
59  
60

1  
2  
3 cancer.<sup>31 34</sup> Meanwhile, some clinical studies demonstrated that higher serum total  
4  
5 cholesterol concentration was associated with decreased risk of liver cancer  
6  
7  
8  
9 (Supplementary Table 3).<sup>38-40</sup> Unfortunately, the studies we included seldom adopt  
10  
11 these two factors for adjustment. These fact all indicated that the statin indication (e.g.  
12  
13 hyperlipidemia) might overestimate its chemopreventive effect.

14  
15  
16 We found similar results in Western countries and Asian countries, which were  
17  
18 different from the meta-analysis conducted by Singh *et al.* which concluded that the  
19  
20 inverse association of statins with HCC was stronger in the Asian population.  
21  
22 Considering we included four more studies, this difference might be caused by the  
23  
24 insufficient data in their meta-analysis.  
25  
26  
27

28  
29 The lipophilic properties of the statins are accompanied by an extensive first-pass  
30  
31 effect at the hepatic level.<sup>41</sup> It is plausible that lipophilic statins will differ in their  
32  
33 liver cancer prevention qualities.<sup>42</sup> However, subgroup analysis of studies with  
34  
35 lipophilic statins found similar results with a summary RR of 0.57 (95% CIs  
36  
37 0.50-0.65). In our study, there was a trend toward more reduction of liver cancer risk  
38  
39 with higher cumulative dosage of statin use (RR 0.54, 95% CIs 0.38–0.77), which  
40  
41 showed the potential of dose-response relationship.  
42  
43  
44

45  
46 Besides the previously described limitations, there were several other limitations  
47  
48 should be noted when interpreting our findings. First, a significant heterogeneity was  
49  
50 observed in the present meta-analysis ( $I^2 = 59\%$ ,  $P=0.002$ ), and the difference in study  
51  
52 design, baseline risk and confounding adjustment might explained the significant  
53  
54 heterogeneity. Results of other subgroup analyses, which pooling the data all studies  
55  
56  
57  
58  
59  
60

1  
2  
3  
4 together, would also be limited by this heterogeneity. Second, other factors may affect  
5  
6 the estimate of RR for liver cancer. For example, the adherence to statin therapy is  
7  
8 known to be associated with healthy lifestyle, which might affect the cancer  
9  
10 outcome.<sup>43</sup> Such information is hard to be captured in databases or medical record in  
11  
12 the observational studies.<sup>44</sup> Third, five observational studies were conducted using the  
13  
14 Taiwanese National Health Insurance Research Database (NHIRD),<sup>27 28 31-33</sup> though  
15  
16 they were not in the same period, there was still a potential that these studies  
17  
18 contained overlapping groups of patients. Although the confounding factors  
19  
20 mentioned above may have a limited effect on our overall results from the present  
21  
22 study, these factors should be considered in future studies aiming at confirming the  
23  
24 protective effects of statins on human cancer risk.  
25  
26  
27  
28  
29

30  
31 The strengths of our meta-analysis were as follows: First, we performed a much more  
32  
33 comprehensively search and more subgroup analyses, compared with the previous  
34  
35 meta-analyses; Second, the methodological quality of the included studies was  
36  
37 reasonable good; Third, publication bias, which due to the tendency of not publishing  
38  
39 small studies with null results, were not found in our meta-analysis.  
40  
41  
42

43  
44 Currently, physicians are less likely to prescribe statins for patients with chronic liver  
45  
46 disease, which are known risk factors of liver cancer, based on the concerns about the  
47  
48 statin-induced liver injury.<sup>27</sup> However, there were number of studies have  
49  
50 demonstrated the safe use, even salutary effects, of statins in patients with HCV  
51  
52 infection, HBV infection or NAFLD.<sup>27 28 45-47</sup> Meanwhile, the risk of serious  
53  
54 statin-related liver injury appears to be no greater than the background incidence of  
55  
56  
57  
58  
59  
60

1  
2  
3  
4 this rare event.<sup>48</sup> Therefore, considering their benefits for cardiovascular event  
5  
6 prevention and potential in liver cancer prevention, statins should not be denied to the  
7  
8 patients with chronic liver diseases.  
9

10  
11 Of note, preclinical studies have indicated that statins possess synergism with other  
12  
13 therapeutic agents *in vitro* and *in vivo* for liver cancer.<sup>49,50</sup> Meanwhile, clinical studies  
14  
15 have also demonstrated that statins would prolong survival in patients with advanced  
16  
17 liver cancer (**Supplementary Table 4**).<sup>51-54</sup> Moreover, statin use might associate with  
18  
19 decrease of cancer recurrence risk in patients of HBV related HCC after curative  
20  
21 surgery.<sup>55</sup> Therefore, considerable interest exists in adjunctive therapy with statins for  
22  
23 liver cancer. In fact, there were several prospective, randomized, controlled trials  
24  
25 ongoing to determine the effectiveness of pravastatin in the treatment of liver cancer,  
26  
27 when used in combination with sorafenib (**Supplementary Table 5**).  
28  
29  
30  
31  
32

33  
34 In conclusion, our results suggest there is a significant inverse association between the  
35  
36 statin use and the risk of liver cancer, when statins are taken daily for cardiovascular  
37  
38 event prevention. However, some confounders might overestimate the preventive  
39  
40 effect. Further studies are needed to investigate the efficacy of statins in the  
41  
42 prevention and treatment of liver cancer.  
43  
44  
45

#### 46 **ACKNOWLEDGEMENT**

47  
48 We thank Medjaden Bioscience Limited for assisting in the preparation of this  
49  
50 manuscript.  
51  
52

#### 53 **REFERENCES:**

- 54  
55  
56 1. Baigent C, Keech A, Kearney PM, *et al*. Efficacy and safety of cholesterol-lowering treatment:  
57 prospective meta-analysis of data from 90,056 participants in 14 randomised trials of statins.  
58  
59  
60



- Lancet 2005;**366**(9493):1267-78.
2. Newman TB, Hulley SB. Carcinogenicity of lipid-lowering drugs. JAMA 1996;**275**(1):55-60.
  3. Demierre MF, Higgins PD, Gruber SB, *et al.* Statins and cancer prevention. Nat Rev Cancer 2005;**5**(12):930-42.
  4. Zeichner S, Mihos CG, Santana O. The pleiotropic effects and therapeutic potential of the hydroxy-methyl-glutaryl-CoA reductase inhibitors in malignancies: A comprehensive review. J Cancer Res Ther 2012;**8**(2):176-83.
  5. Lonardo A, Loria P. Potential for statins in the chemoprevention and management of hepatocellular carcinoma. J Gastroenterol Hepatol 2012;**27**(11):1654-64.
  6. Shimoyama S. Statins are logical candidates for overcoming limitations of targeting therapies on malignancy: their potential application to gastrointestinal cancers. Cancer Chemother Pharmacol 2011;**67**(4):729-39.
  7. Dale KM, Coleman CI, Henyan NN, *et al.* Statins and cancer risk: a meta-analysis. JAMA 2006;**295**(1):74-80.
  8. Browning DRL, Martin RM. Statins and risk of cancer: A systematic review and metaanalysis. Int J Cancer 2007;**120**(4):833-43.
  9. Kuoppala J, Lamminpaa A, Pukkala E. Statins and cancer: A systematic review and meta-analysis. Eur J Cancer 2008;**44**(15):2122-32.
  10. Baigent C, Blackwell L, Emberson J, *et al.* Efficacy and safety of more intensive lowering of LDL cholesterol: a meta-analysis of data from 170,000 participants in 26 randomised trials. Lancet 2010;**376**(9753):1670-81.
  11. Bonovas S, Filioussi K, Tsavaris N, *et al.* Use of statins and breast cancer: a meta-analysis of seven randomized clinical trials and nine observational studies. J Clin Oncol 2005;**23**(34):8606-12.
  12. Shimoyama S. Statins and gastric cancer risk. Hepatogastroenterology 2011;**58**(107-108):1057-61.
  13. Cui X, Xie Y, Chen M, *et al.* Statin use and risk of pancreatic cancer: a meta-analysis. Cancer Causes Control 2012;**23**(7):1099-111.
  14. Bansal D, Undela K, D'Cruz S, *et al.* Statin Use and Risk of Prostate Cancer: A Meta-Analysis of Observational Studies. PLoS One 2012;**7**(10):e46691.
  15. Bardou M, Barkun A, Martel M. Effect of statin therapy on colorectal cancer. Gut 2010;**59**(11):1572-85.
  16. Singh S, Singh PP, Singh AG, *et al.* Statins Are Associated With a Reduced Risk of Hepatocellular Cancer: A Systematic Review and Meta-analysis. Gastroenterology 2013;**144**(2):323-32.
  17. Moher D, Liberati A, Tetzlaff J, *et al.* Preferred reporting items for systematic reviews and meta-analyses: the PRISMA statement. BMJ 2009;**339**:b2535.
  18. GA Wells, B Shea, D O'Connell, *et al.* The Newcastle-Ottawa Scale (NOS) for assessing the quality of nonrandomised studies in meta-analyses. [http://www.ohri.ca/programs/clinical\\_epidemiology/oxford.asp](http://www.ohri.ca/programs/clinical_epidemiology/oxford.asp).
  19. Higgins JP, Thompson SG, Deeks JJ, *et al.* Measuring inconsistency in meta-analyses. BMJ 2003;**327**(7414):557-60.
  20. METABIAS: Stata module to test for small-study effects in meta-analysis [program], 2009.
  21. Matsushita Y, Sugihara M, Kaburagi J, *et al.* Pravastatin use and cancer risk: a meta-analysis of individual patient data from long-term prospective controlled trials in Japan. Pharmacoepidemiol Drug Saf 2010;**19**(2):196-202.
  22. Emberson JR, Kearney PM, Blackwell L, *et al.* Lack of effect of lowering LDL cholesterol on cancer:

- meta-analysis of individual data from 175,000 people in 27 randomised trials of statin therapy. *PLoS One* 2012;**7**(1):e29849.
23. Stein EA, Corsini A, Gimpelewicz CR, *et al.* Fluvastatin treatment is not associated with an increased incidence of cancer. *Int J Clin Pract* 2006;**60**(9):1028-34.
24. Friis S, Poulsen AH, Johnsen SP, *et al.* Cancer risk among statin users: A population-based cohort study. *Int J Cancer* 2005;**114**(4):643-7.
25. Friedman GD, Flick ED, Udaltsova N, *et al.* Screening statins for possible carcinogenic risk: up to 9 years of follow-up of 361,859 recipients. *Pharmacoepidemiol Drug Saf* 2008;**17**(1):27-36.
26. Marelli C, Gunnarsson C, Ross S, *et al.* Statins and Risk of Cancer A Retrospective Cohort Analysis of 45,857 Matched Pairs From an Electronic Medical Records Database of 11 Million Adult Americans. *J Am Coll Cardiol* 2011;**58**(5):530-7.
27. Tsan YT, Lee CH, Wang JD, *et al.* Statins and the risk of hepatocellular carcinoma in patients with hepatitis B virus infection. *J Clin Oncol* 2012;**30**(6):623-30.
28. Tsan YT, Lee CH, Ho WC, *et al.* Statins and the risk of hepatocellular carcinoma in patients with hepatitis C virus infection. *J Clin Oncol* 2013;**31**(12):1514-21.
29. Khurana V, Saluja A, Caldito G, *et al.* Statins are protective against hepatocellular cancer in patients with hepatitis C virus infection: Half a million US veterans' study. *Gastroenterology* 2005;**128**(4, Suppl. 2):A714.
30. El-Serag HB, Johnson ML, Hachem C, *et al.* Statins are associated with a reduced risk of hepatocellular carcinoma in a large cohort of patients with diabetes. *Gastroenterology* 2009;**136**(5):1601-8.
31. Chiu HF, Ho SC, Chen CC, *et al.* Statin use and the risk of liver cancer: a population-based case-control study. *Am J Gastroenterol* 2011;**106**(5):894-8.
32. Lai SW, Liao KF, Lai HC, *et al.* Statin use and risk of hepatocellular carcinoma. *Eur J Epidemiol* 2013;**28**(6):485-92.
33. Leung HW, Chan AL, Lo D, *et al.* Common cancer risk and statins: a population-based case-control study in a Chinese population. *Expert Opin Drug Saf* 2013;**12**(1):19-27.
34. Chaiteerakij R, Yang JD, Harmsen WS, *et al.* Risk factors for intrahepatic cholangiocarcinoma: association between metformin use and reduced cancer risk. *Hepatology* 2013;**57**(2):648-55.
35. Singh S, Singh PP, Roberts LR, *et al.* Chemopreventive strategies in hepatocellular carcinoma. *Nat Rev Gastroenterol Hepatol* 2014;**11**(1):45-54.
36. Pradelli D, Soranna D, Scotti L, *et al.* Statins and primary liver cancer: a meta-analysis of observational studies. *Eur J Cancer Prev* 2013;**22**(3):229-34.
37. Zhang H, Gao C, Fang L, *et al.* Statin use and risk of liver cancer: A meta-analysis of 7 studies involving more than 4.7 million patients. *World J Meta-Anal* 2013;**1**(3):130-7.
38. Ahn J, Lim U, Weinstein SJ, *et al.* Prediagnostic total and high-density lipoprotein cholesterol and risk of cancer. *Cancer Epidemiol Biomarkers Prev* 2009;**18**(11):2814-21.
39. Iso H, Ikeda A, Inoue M, *et al.* Serum cholesterol levels in relation to the incidence of cancer: the JPHC study cohorts. *Int J Cancer* 2009;**125**(11):2679-86.
40. Kitahara CM, de Gonzalez AB, Freedman ND, *et al.* Total Cholesterol and Cancer Risk in a Large Prospective Study in Korea. *J Clin Oncol* 2011;**29**(12):1592-8.
41. Gazerro P, Proto MC, Gangemi G, *et al.* Pharmacological actions of statins: a critical appraisal in the management of cancer. *Pharmacol Rev* 2012;**64**(1):102-46.
42. Gronich N, Rennert G. Beyond aspirin - Cancer prevention with statins, metformin and

- bisphosphonates. *Nat Rev Clin Oncol* 2013;**10**(11):625-42.
43. Brookhart MA, Patrick AR, Dormuth C, *et al.* Adherence to lipid-lowering therapy and the use of preventive health services: an investigation of the healthy user effect. *Am J Epidemiol* 2007;**166**(3):348-54.
44. Boudreau DM, Yu O, Johnson J. Statin use and cancer risk: a comprehensive review. *Expert Opin Drug Saf* 2010;**9**(4):603-21.
45. Lewis JH, Mortensen ME, Zweig S, *et al.* Efficacy and safety of high-dose pravastatin in hypercholesterolemic patients with well-compensated chronic liver disease: Results of a prospective, randomized, double-blind, placebo-controlled, multicenter trial. *Hepatology* 2007;**46**(5):1453-63.
46. Nelson A, Torres DM, Morgan AE, *et al.* A pilot study using simvastatin in the treatment of nonalcoholic steatohepatitis: A randomized placebo-controlled trial. *J Clin Gastroenterol* 2009;**43**(10):990-4.
47. Lewis JH. Clinical Perspective: Statins and the Liver-Harmful or Helpful? *Dig Dis Sci* 2012;**57**(7):1754-63.
48. Bader T. The myth of statin-induced hepatotoxicity. *Am J Gastroenterol* 2010;**105**(5):978-80.
49. Kim W, Yoon JH, Kim JR, *et al.* Synergistic anti-tumor efficacy of lovastatin and protein kinase C-beta inhibitor in hepatocellular carcinoma. *Cancer Chemother Pharmacol* 2009;**64**(3):497-507.
50. Polo MP, Crespo R, de Bravo MG. Geraniol and simvastatin show a synergistic effect on a human hepatocarcinoma cell line. *Cell Biochem Funct* 2011;**29**(6):452-8.
51. Kawata S, Yamasaki E, Nagase T, *et al.* Effect of pravastatin on survival in patients with advanced hepatocellular carcinoma. A randomized controlled trial. *Br J Cancer* 2001;**84**(7):886-91.
52. Lersch C, Schmelz R, Erdmann J, *et al.* Treatment of HCC with pravastatin, octreotide, or gemcitabine - A critical evaluation. *Hepatogastroenterology* 2004;**51**(58):1099-103.
53. Graf H, Jungst C, Straub G, *et al.* Chemoembolization combined with pravastatin improves survival in patients with hepatocellular carcinoma. *Digestion* 2008;**78**(1):34-8.
54. Georgescu EF, Badulescu F, Dumitrescu D, *et al.* Lovastatin may enhance cytostatic effects of sorafenib in hepatic carcinoma. Primary results of a pilot study. *Hepatol Int* 2011;**5**(1):423.
55. Wu CY, Chen YJ, Ho HJ, *et al.* Association between nucleoside analogues and risk of hepatitis B virus-related hepatocellular carcinoma recurrence following liver resection. *JAMA* 2012;**308**(18):1906-14.

**FIGURE LEGENDS:**

**Figure 1.** Flow chart of study selection in the present meta-analysis.

**Figure 2.** Overall meta-analysis of the statin use and the liver cancer risk.

**Supplementary Figure 1.** Subgroup analyses based on baseline risk of liver cancer.

**Supplementary Figure 2.** Subgroup analysis based on confounding adjustment.

**Supplementary Figure 3.** Subgroup analysis based on study location.

**Supplementary Figure 4.** Subgroup analyses of use of lipophilic statins.

**Supplementary Figure 5.** Subgroup analyses of higher cumulative dosage of statin

use.

**Table 1.** Study characteristics

| Studies                                  | Study design | Patient population                                                      | Study period | Cases defined | Follow-up      | Statins type         | Dosage/Duration of Statin use |
|------------------------------------------|--------------|-------------------------------------------------------------------------|--------------|---------------|----------------|----------------------|-------------------------------|
| Stein, 2006, USA <sup>23</sup>           | RCT          | Pooled analysis of 8 RCTs                                               | -            | NR            | 2.4 years (M)  | F, 20–80 mg daily    | 2.4 years (M)                 |
| Matsushita, 2010, Japan <sup>21</sup>    | RCT          | IPD analysis of 3 RCTs                                                  | -            | ICD-9 155     | ≥4.7 years     | P, 10-20 mg daily    | ≥4.7 years                    |
| Emberson, 2012, UK <sup>22</sup>         | RCT          | IPD analysis of 22 RCTs                                                 | -            | ICD-9 155     | 5.1 years (Me) | A, F, L, P, R, S     | 5.1 years (Me)                |
| Friis, 2005, North Jutland <sup>24</sup> | Cohort       | General population (CPR)                                                | 1989-2002    | ICD-10 C22    | 3.3 years (M)  | Unspecified          | ≥2 Rx                         |
| Friedman, 2008, USA <sup>25</sup>        | Cohort       | General population (KPMCP)                                              | 1994-2003    | ICD-9-CM 155  | > 2 years      | A, L, S (97.6%)      | ≥1 Rx                         |
| Marelli, 2011, USA <sup>26</sup>         | Cohort       | General older population (men ≥ 45 and women ≥ 55 years; GE Centricity) | 1990-2009    | ICD-9 155     | 4.6 years (M)  | Unspecified          | ≥1 cDDD                       |
| Tsan, 2012, Taiwan <sup>27</sup>         | Cohort       | Patients with HBV infection (NHIRD)                                     | 1997-2008    | ICD-9 155     | 9.9 years (M)  | A, F, L, P, R, and S | ≥28 cDDDs                     |
| Tsan, 2013, Taiwan <sup>28</sup>         | Cohort       | Patients with HCV infection (NHIRD)                                     | 1999-2010    | ICD-9 155     | 10.7 years (M) | A, F, L, P, R, and S | ≥28 cDDDs                     |
| Khurana, 2005, USA <sup>29</sup>         | Case control | General population (VISN)                                               | 1997-2002    | ICD-9 155     | NR             | Unspecified          | ≥1 Rx                         |
| El-Serag, 2009, USA <sup>30</sup>        | Case control | Diabetes patients (VA)                                                  | 1997-2002    | ICD-9-CM 155  | 2.4 years (M)  | A, C, F, L, P, and S | 1.6 years (M)                 |
| Chiu, 2011, Taiwan <sup>31</sup>         | Case control | Older patients (≥ 50 years; NHIRD)                                      | 2005–2008    | ICD-9-CM 155  | NR             | A, F, L, P, R, and S | ≥ 1 cDDD                      |
| Lai, 2013, Taiwan <sup>32</sup>          | Case control | General population (NHIRD)                                              | 2000-2009    | ICD-9-CM 155  | 1.4 years (M)  | A, F, L, P, R, and S | ≥1 Rx                         |
| Leung, 2013, Taiwan <sup>33</sup>        | Case control | General population (NHIRD)                                              | 2000-2008    | ICD-9-CM 155  | 4.1 years (M)  | Unspecified          | > 0.5 years                   |
| Chaiteerakij, 2013, USA <sup>34</sup>    | Case control | Hyperlipidemia patients (Mayo Clinic)                                   | 2000-2010    | ICD-9-CM 155  | >1 years       | Unspecified          | ≥1 Rx                         |

Patients population: IPD=Individual patient data, RCT = randomized controlled trials, CRP=the Central Population Register of Danish citizens, KPMCP=the Kaiser Permanente Medical Care Program in northern California, GE Centricity=the General Electric Centricity database, NHIRD=the Taiwanese National Health Insurance research database, VISN=Veterans Integrated Service Networks 16 Veteran Affairs database, VA=Veterans Affairs national databases, Mayo Clinic= Mayo Clinic (Rochester, MN), HBV = hepatitis B virus; Cases defined: ICD-9 or -10 =International Classification of Diseases, Ninth Revision or Tenth Revision, CM=Clinical Modification; Duration of follow-up: When the follow-up periods of statin user and nonuser were different, only the shorter one was showed, and all periods were transformed to years; Statin type: A=Atorvastatin, C=Cerivastatin, F=Fluvastatin, L=Lovastatin, P=Pravastatin, R=Rosuvastatin, S=Simvastatin, Non-statin= Non-statin cholesterol-lowering drug(s) only; Duration of statin use: M=Mean, Me=Median, ≥1 cDDD = more than 1 cumulative defined daily dose before the diagnosis of liver cancer, Rx=prescriptions.

1  
2  
3  
4  
5  
6  
7  
8  
9  
10  
11  
12  
13  
14  
15  
16  
17  
18  
19  
20  
21  
22  
23  
24  
25  
26  
27  
28  
29  
30  
31  
32  
33  
34  
35  
36  
37  
38  
39  
40  
41  
42  
43  
44  
45  
46  
47  
48  
49

**Table 2.** Study data

| Studies                                   | Intervention/ Cases           |              | Control                       |              | Measurements of effect estimates | Crude RR with 95% CIs | Adjusted RR with 95% CIs | Confounders for adjustment      |
|-------------------------------------------|-------------------------------|--------------|-------------------------------|--------------|----------------------------------|-----------------------|--------------------------|---------------------------------|
|                                           | No. of event/ No. of exposure | No. of total | No. of event/ No. of exposure | No. of total |                                  |                       |                          |                                 |
| Stein, 2006, USA <sup>23</sup>            | 3                             | 3512         | 4                             | 3289         | RR                               | 0.70 (0.16-3.14)*     | 0.70 (0.16-3.14)*        | Randomization                   |
| Matsushita, 2010, Japan <sup>21</sup>     | 5                             | 7375         | 7                             | 6349         | HR                               | NA                    | 0.58 (0.18-1.84)         | Randomization                   |
| Emberson, 2012, UK <sup>22</sup>          | 35                            | 67258        | 33                            | 67279        | RR                               | 1.06 (0.66, 1.71)*    | 1.06 (0.66, 1.71)*       | Randomization                   |
| Friis, 2005, North Jutland <sup>24</sup>  | 1                             | 12251        | 166                           | 334754       | OR                               | NA                    | 1.16 (0.46-2.90)         | 1,2, 16, 21, 23                 |
| Friedman(Male), 2008, USA <sup>25</sup>   | 32                            | 192598       | NA                            | NA           | HR                               | NA                    | 0.49 (0.34-0.70)         | 16                              |
| Friedman(Female), 2008, USA <sup>25</sup> | 10                            | 169261       | NA                            | NA           | HR                               | NA                    | 0.40 (0.21-0.75)         |                                 |
| Marelli, 2011, USA <sup>26</sup>          | 13                            | 45857        | 24                            | 45857        | RR                               | 0.31 (0.14-0.68)*     | 0.31 (0.14-0.68)*        | 1-5, 14, 16-18, 26, 27          |
| Tsan, 2012, Taiwan <sup>27</sup>          | 58                            | 2785         | 963                           | 30628        | HR                               | 0.66 (0.51- 0.86)     | 0.47 (0.36-0.61)         | 1, 2, 7, 8, 11, 12              |
| Tsan, 2013, Taiwan <sup>28</sup>          | 1378                          | 35023        | 26505                         | 225841       | HR                               | 0.42 (0.39-0.46)      | 0.53 (0.49-0.58)         | 1, 2, 7, 8, 11, 13              |
| Khurana, 2005, USA <sup>29</sup>          | NA                            | NA           | NA                            | NA           | OR                               | NA                    | 0.52 (0.41- 0.67)        | 1, 11, 13                       |
| El-Serag, 2009, USA <sup>30</sup>         | 447                           | 1303         | 2766                          | 5212         | OR                               | 0.46 (0.40-0.52)      | 0.74 (0.64-0.87)         | 1-3, 6, 8, 9, 11-13, 21, 24, 28 |
| Chiu, 2011, Taiwan <sup>31</sup>          | 117                           | 1166         | 195                           | 1166         | OR                               | 0.53 (0.41-0.69)      | 0.62 (0.45-0.83)         | 1, 2, 8, 9, 11, 12, 20, 29      |
| Lai, 2013, Taiwan <sup>32</sup>           | 255                           | 3480         | 1635                          | 13920        | OR                               | 0.61 (0.52-0.72)      | 0.71 (0.56-0.89)         | 1, 2, 8-13, 22, 24, 25          |
| Leung, 2013, Taiwan <sup>33</sup>         | 26                            | 424          | 6851                          | 33781        | HR                               | 0.45 (0.30-0.67)      | 0.44 (0.28, 0.72)        | 1, 2, 11, 15, 20, 21, 23        |
| Chaiteerakij, 2013, USA <sup>34</sup>     | 72                            | 165          | 165                           | 256          | OR                               | NA                    | 0.6 (0.4-0.9)            | 1-3, 8, 11, 17, 22, 28, 30      |

\*=the RR was calculated based on raw data; Adjusted RR=RR adjusted for confounders; Confounders for adjustment: 1=age, 2=sex, 3=race, 4=BMI, 5=smoking status, 6=ethanol intake, 7=socioeconomic status, 8=cirrhosis, 9=alcoholic liver disease, 10=non-alcoholic fatty liver disease, 11=diabetes mellitus, 12=HBV infection, 13=HCV infection, 14=concomitant diagnoses (unspecified), 15=Charlson score, 16=calendar year, 17=cholesterol (total cholesterol, VLDL, LDL, or triglycerides), 18=prostate-specific antigen, 19=resection extent, 20=other lipid-lowering agents, 21=cardiovascular medications (aspirin, nonsteroidal anti-inflammatory medications, or angiotensin-converting enzymes inhibitors), 22=metformin or thiazolidinedione, 23=hormone-replacement therapy, 24=HCV treatment, 25=HBV treatment, 26=medications taken (unspecified), 27=the number of office visits, 28=propensity to use statins, 29=hospital stay, 30=biliary tract diseases

**Table 3. Subgroup analyses of included studies**

| Subgroup                                  | No. of studies (reports)      | Summary RR ( 95% CIs) | Heterogeneity, I <sup>2</sup> | Heterogeneity, P value | Test for subgroup differences, I <sup>2</sup> | Test for subgroup differences, P value |                |
|-------------------------------------------|-------------------------------|-----------------------|-------------------------------|------------------------|-----------------------------------------------|----------------------------------------|----------------|
| <b>Study design</b>                       | RCTs                          | 3                     | 0.95 (0.62-1.44)              | 0%                     | P=0.59                                        | 79.9%                                  | <b>P=0.007</b> |
|                                           | Cohort studies                | 5 (6)                 | 0.51 (0.44-0.58)              | 18%                    | P=0.30                                        |                                        |                |
|                                           | Case-control studies          | 6                     | 0.63 (0.54-0.73)              | 46%                    | P=0.10                                        |                                        |                |
| <b>Baseline risk of liver cancer</b>      | Higher baseline risk          | 4                     | 0.52 (0.47, 0.59)             | 16%                    | P=0.31                                        | 82.7%                                  | <b>P=0.003</b> |
|                                           | General population            | 8 (9)                 | 0.60 (0.49-0.75)              | 48%                    | P=0.05                                        |                                        |                |
|                                           | Other population              | 2                     | 0.72 (0.62-0.83)              | 0%                     | P=0.34                                        |                                        |                |
| <b>Confounding adjustment</b>             | Adjusted adequately studies   | 6                     | 0.67 (0.56-0.83);             | 47%                    | P=0.09                                        | 69.2%                                  | <b>P=0.07</b>  |
|                                           | Adjusted inadequately studies | 8 (9)                 | 0.58 (0.51-0.66)              | 40%                    | P=0.10                                        |                                        |                |
| <b>Study location</b>                     | Western studies               | 8 (9)                 | 0.61 (0.49-0.76)              | 59%                    | P=0.01                                        | 0%                                     | <b>P=0.49</b>  |
|                                           | Asian studies                 | 6                     | 0.56 (0.49- 0.64)             | 38%                    | P=0.15                                        |                                        |                |
| <b>Use of lipophilic statins</b>          |                               | 6 (7)                 | 0.57 (0.50-0.65)              | 40%                    | P=0.13                                        | -                                      | -              |
| <b>Higher cumulative dosage of statin</b> |                               | 8                     | 0.54 (0.38- 0.77)             | 85%                    | P<0.0001                                      | -                                      | -              |

RR= relative risk; higher baseline risk: older patients, HBV or HCV infected patients. Confounding adjustment: Adjusted adequately means reported RR have been adjusted for at least 4 of 7 important factors: HBV infection, HCV infection, cirrhosis, NAFLD, HCV treatment, HBV treatment, Anti diabetic medications; Lipophilic statin use: use of atorvastatin, fluvastatin, lovastatin, or simvastatin; Higher cumulative dosage of statin use: > 180cumulative defined daily dose or Duration of statin use > 0.5 years before the diagnosis of liver cancer.

1  
2  
3  
4  
5  
6  
7  
8  
9  
10  
11  
12  
13  
14  
15  
16  
17  
18  
19  
20  
21  
22  
23  
24  
25  
26  
27  
28  
29  
30  
31  
32  
33  
34  
35  
36  
37  
38  
39  
40  
41  
42  
43  
44  
45  
46  
47  
48  
49  
50  
51  
52  
53  
54  
55  
56  
57  
58  
59  
60

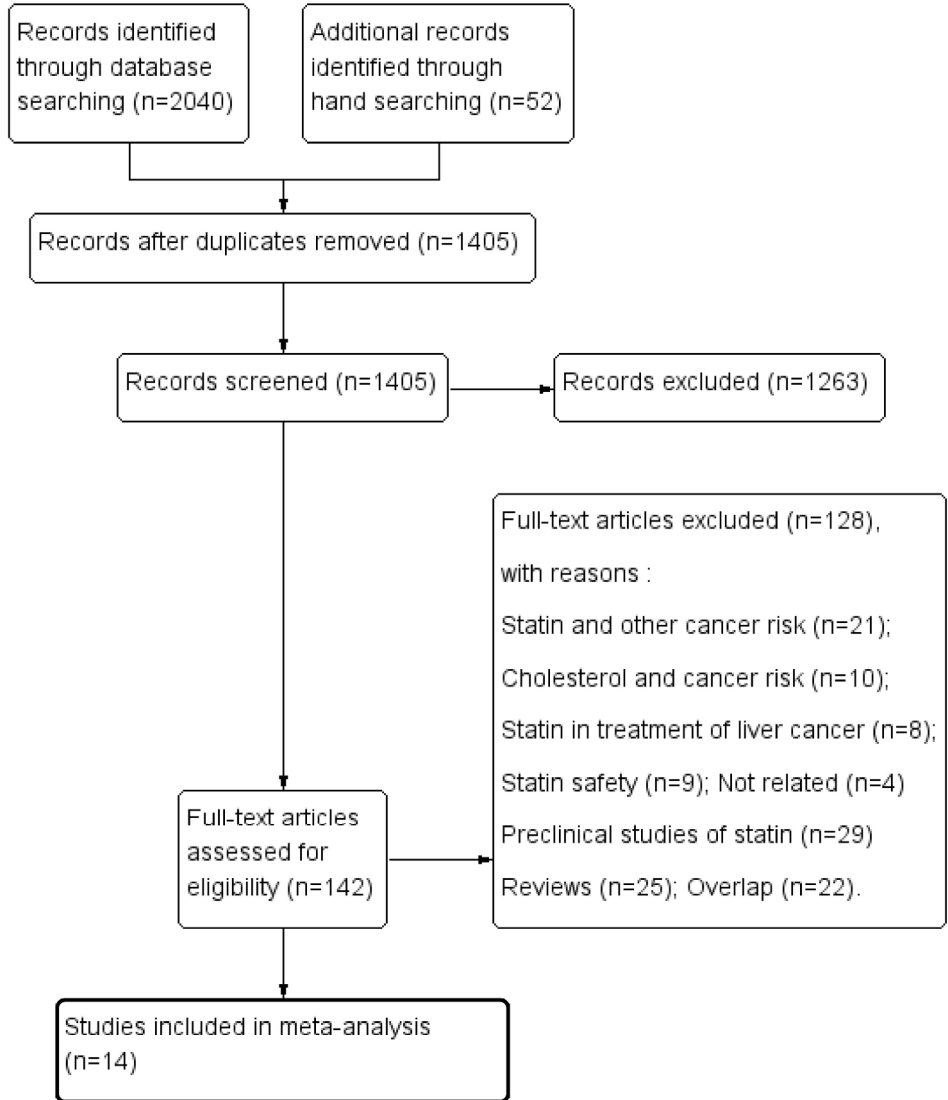

Flow chart of study selection in the present meta-analysis.  
227x264mm (300 x 300 DPI)



1  
2  
3  
4  
5  
6  
7  
8  
9  
10  
11  
12  
13  
14  
15  
16  
17  
18  
19  
20  
21  
22  
23  
24  
25  
26  
27  
28  
29  
30  
31  
32  
33  
34  
35  
36  
37  
38  
39  
40  
41  
42  
43  
44  
45  
46  
47  
48  
49  
50  
51  
52  
53  
54  
55  
56  
57  
58  
59  
60

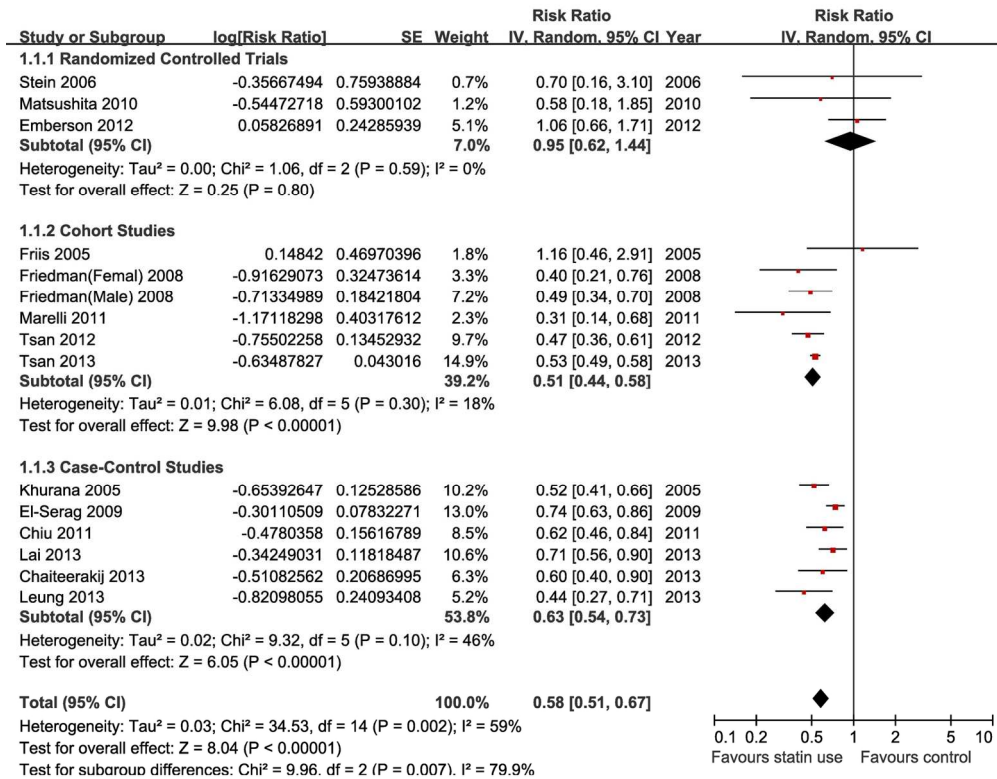

Overall meta-analysis of the statin use and the liver cancer risk  
152x118mm (300 x 300 DPI)

## SUPPLEMENTARY FIGURES:

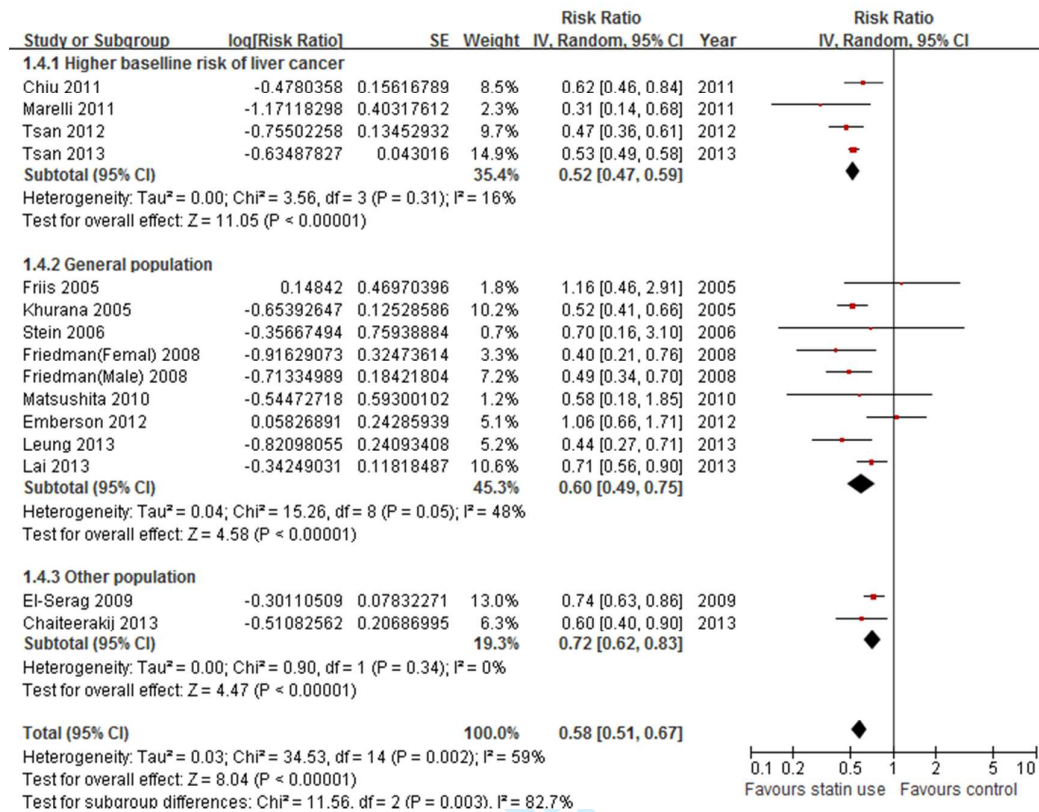

Supplementary Figure 1. Subgroup analyses based on baseline risk of liver cancer.

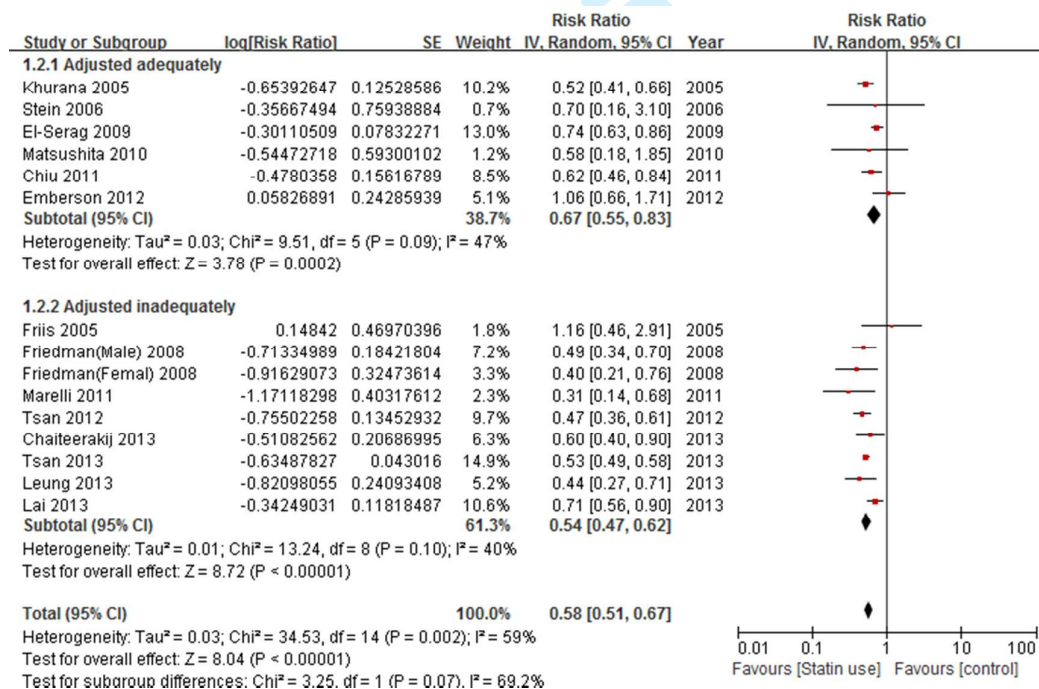

Supplementary Figure 2. Subgroup analysis based on confounding adjustment.

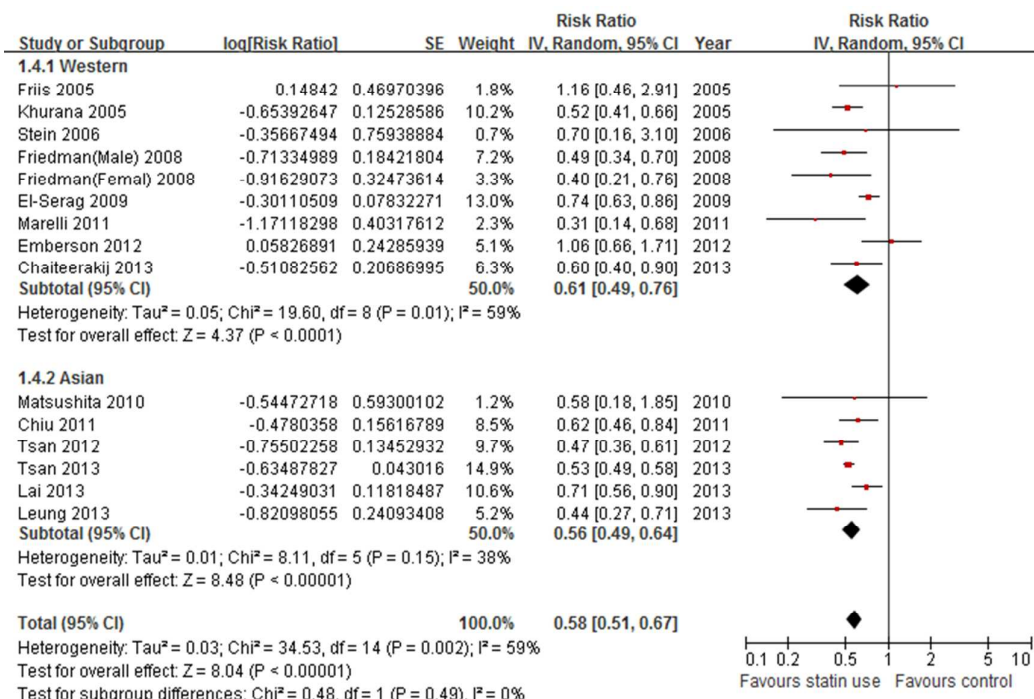

Supplementary Figure 3. Subgroup analysis based on study location.

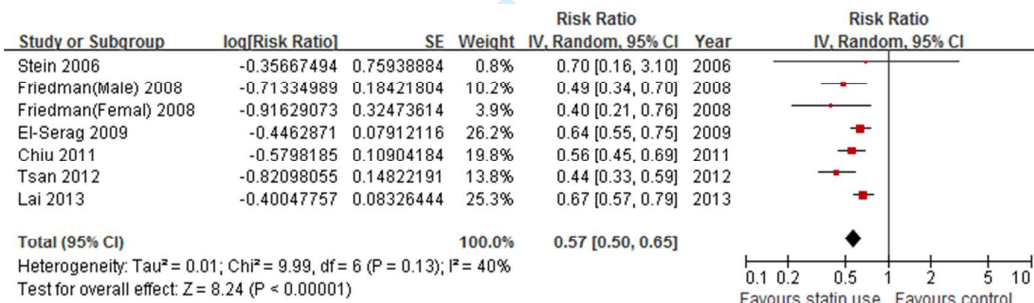

Supplementary Figure 4. Subgroup analyses of use of lipophilic statins.

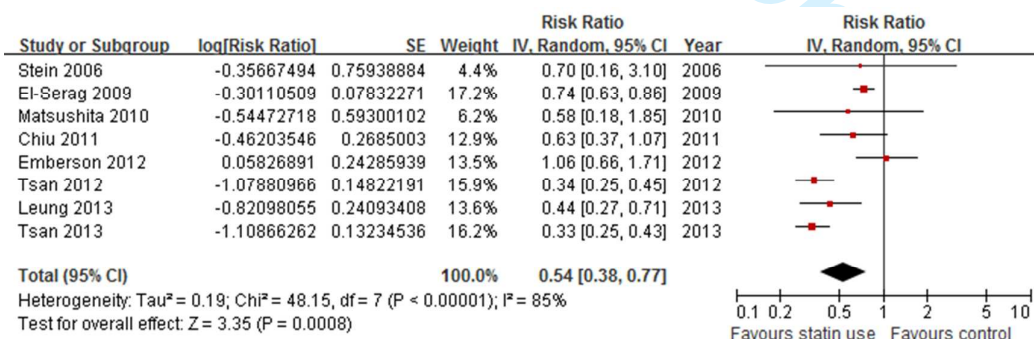

Supplementary Figure 5. Subgroup analyses of higher cumulative dosage of statin use.

## SUPPLEMENTARY TABLES:

Supplementary Table 1. Assessment of methodological quality of the cohort and case-control studies according to the Newcastle–Ottawa Scale

| Cohort Studies               | Selection                                |                                     |                           | Outcome of present at start of study | Comparability                |                       | Outcome               |                       | Total Score |
|------------------------------|------------------------------------------|-------------------------------------|---------------------------|--------------------------------------|------------------------------|-----------------------|-----------------------|-----------------------|-------------|
|                              | Representativeness of the exposed cohort | Selection of the non-exposed cohort | Ascertainment of exposure |                                      | Control for important factor | Assessment of outcome | Follow-up long enough | Adequacy of follow up |             |
| Friis, 2005 <sup>24</sup>    | ☑                                        | ☑                                   | ☑                         | ☑                                    | ☑                            | ☑                     | -                     | ☑                     | 7           |
| Friedman, 2008 <sup>25</sup> | ☑                                        | ☑                                   | ☑                         | ☑                                    | ☑                            | ☑                     | -                     | ☑                     | 7           |
| Marelli, 2011 <sup>26</sup>  | ☑                                        | ☑                                   | ☑                         | ☑                                    | ☑                            | ☑                     | ☑                     | ☑                     | 8           |
| Tsan, 2012 <sup>27</sup>     | ☑                                        | ☑                                   | ☑                         | ☑                                    | ☑                            | ☑                     | ☑                     | ☑                     | 8           |
| Tsan, 2013 <sup>28</sup>     | ☑                                        | ☑                                   | ☑                         | ☑                                    | ☑                            | ☑                     | ☑                     | ☑                     | 8           |

  

| Case-Control Studies             | Selection                    |                             |                       | Definition of controls | Comparability                |                           | Exposure                           |                   | Total Score |
|----------------------------------|------------------------------|-----------------------------|-----------------------|------------------------|------------------------------|---------------------------|------------------------------------|-------------------|-------------|
|                                  | Adequate definition of cases | Representativeness of cases | Selection of controls |                        | Control for important factor | Ascertainment of Exposure | Same method for cases and controls | Non-response rate |             |
| Khurana, 2005 <sup>29</sup>      | -                            | ☑                           | ☑                     | ☑                      | ☑                            | ☑                         | ☑                                  | -                 | 6           |
| El-Serag, 2009 <sup>30</sup>     | -                            | ☑                           | ☑                     | ☑                      | ☑ ☑                          | ☑                         | ☑                                  | -                 | 7           |
| Chiu, 2011 <sup>31</sup>         | -                            | ☑                           | ☑                     | ☑                      | ☑ ☑                          | ☑                         | ☑                                  | -                 | 7           |
| Lai, 2013 <sup>32</sup>          | -                            | ☑                           | ☑                     | ☑                      | ☑ ☑                          | ☑                         | ☑                                  | -                 | 7           |
| Leung, 2013 <sup>33</sup>        | ☑                            | ☑                           | ☑                     | ☑                      | ☑                            | ☑                         | ☑                                  | ☑                 | 8           |
| Chaiteerakij, 2013 <sup>34</sup> | -                            | ☑                           | -                     | ☑                      | ☑                            | ☑                         | ☑                                  | -                 | 5           |

Control for important factor: ☑ Reported relative risk have been adjusted for at least 4 of 7 important factors: HBV infection, HCV infection, cirrhosis, NAFLD, HCV treatment, HBV treatment, anti-diabetic medications; ☑ Study controls for any additional factor. Assessment of outcome: ☑ record linkage. Follow-up long enough: ☑ follow up period  $\geq 4$  years. Adequate definition of cases: ☑ The case is defined with independent validation. Non-response rate: ☑ Same rate for both groups.

**Supplementary Table 2.** Studies reporting RR for use of lipophilic statins and for higher cumulative dosage of statin use

| Studies                           | Measurements of effect estimates | Statins type         | Dosage/Duration of Statin use | Crude RR with 95% CIs | Adjusted RR with 95% CIs |
|-----------------------------------|----------------------------------|----------------------|-------------------------------|-----------------------|--------------------------|
| Tsan, 2012, Taiwan <sup>27</sup>  | HR                               | A, F, L, P, R, and S | >365 cDDD                     | 0.50 (0.26-0.96)      | 0.34 (0.33-0.59)         |
|                                   | HR                               | Lipophilia statin    | ≥28 cDDD                      | 0.65 (0.39-1.09)      | 0.44 (0.33-0.59)         |
| Tsan, 2013, Taiwan <sup>28</sup>  | HR                               | A, F, L, P, R, and S | >180 cDDD                     | NA                    | 0.33 (0.25-0.42)         |
| El-Serag, 2009, USA <sup>30</sup> | OR                               | Simvastatin          | 1.6 years (M)                 | 0.47 (0.41- 0.54)     | 0.64 (0.55-0.75)         |
| Chiu, 2011, Taiwan <sup>31</sup>  | OR                               | A, F, L, P, R, and S | >215.4 cDDD                   | 0.47 (0.30-0.72)      | 0.63 (0.37-1.06)         |
|                                   | OR                               | Lipophilia statin    | ≥ 1 cDDD                      | 0.56 (0.45-0.69)*     | 0.56 (0.45-0.69)*        |
| Lai, 2013, Taiwan <sup>32</sup>   | OR                               | Lipophilia statin    | ≥1 Rx                         | 0.67 (0.57-0.79)*     | 0.67 (0.57-0.79)*        |

\*= RR was calculated based on raw data; Adjusted RR=RR adjusted for confounders

1  
2  
3  
4  
5  
6  
7  
8  
9  
10  
11  
12  
13  
14  
15  
16  
17  
18  
19  
20  
21  
22  
23  
24  
25  
26  
27  
28  
29  
30  
31  
32  
33  
34  
35  
36  
37  
38  
39  
40  
41  
42  
43  
44  
45  
46  
47  
48  
49

Supplementary Table 3. Published studies of the total cholesterol and the risk of liver cancer

| Studies                             | Study design                                                                                | cases/<br>participants | Follow-up  | Reference<br>(mg/dL) | Index (mg/dL) | Adjusted HR (95% CIs) |                   | P for trend*                   | Confounders for<br>adjustment |
|-------------------------------------|---------------------------------------------------------------------------------------------|------------------------|------------|----------------------|---------------|-----------------------|-------------------|--------------------------------|-------------------------------|
|                                     |                                                                                             |                        |            |                      |               | Men                   | Women             |                                |                               |
| Iso, 2009, Japan <sup>39</sup>      | Population-based cohort<br>(JPHC Study)                                                     | 125 /33,368            | 12.4 years | 180–199              | < 160         | 2.62 (1.44–4.76)      | 4.15 (1.70–10.16) | Men < 0.0001<br>Women < 0.0001 | 1-10                          |
|                                     |                                                                                             |                        |            |                      | 160–179       | 1.04 (0.52–2.07)      | 1.99 (0.82–4.85)  |                                |                               |
|                                     |                                                                                             |                        |            |                      | 180–199       | 1                     | 1                 |                                |                               |
|                                     |                                                                                             |                        |            |                      | 200–219       | 0.56 (0.24–1.28)      | 1.09 (0.44–2.68)  |                                |                               |
|                                     |                                                                                             |                        |            |                      | 200–239       | 0.49 (0.16–1.44)      | 0.41 (0.11–1.52)  |                                |                               |
| Ahn, 2009, Finland <sup>38</sup>    | Placebo-controlled,<br>double-blinded primary<br>prevention trial in male<br>smokers (ATBC) | 191/29,093             | 18.0 years | < 203.9              | < 203.9       | 1                     | -                 | P=0.0007                       | 1-5, 11-17                    |
|                                     |                                                                                             |                        |            |                      | 203.9-227.6   | 0.69 (0.46-1.05)      | -                 |                                |                               |
|                                     |                                                                                             |                        |            |                      | 227.7-249.2   | 0.63 (0.41-0.97)      | -                 |                                |                               |
|                                     |                                                                                             |                        |            |                      | 249.3-276.6   | 0.56 (0.36-0.88)      | -                 |                                |                               |
|                                     |                                                                                             |                        |            |                      | > 276.7       | 0.66 (0.43-1.01)      | -                 |                                |                               |
| Kitahara, 2011, Korea <sup>40</sup> | Prospective study of Korean<br>men and women (Korean<br>NHIC)                               | 10,161/1,189,719       | 12.7 years | < 160                | < 160         | 1                     | -                 | Men < 0.001<br>Women < 0.001   | 2-5, 13, 18                   |
|                                     |                                                                                             |                        |            |                      | 160-179       | 0.69 (0.65-74)        | 0.63 (0.54-0.72)  |                                |                               |
|                                     |                                                                                             |                        |            |                      | 180-199       | 0.62 (0.58-0.66)      | 0.50 (0.44-0.58)  |                                |                               |
|                                     |                                                                                             |                        |            |                      | 200-239       | 0.48 (0.45-0.51)      | 0.37(0.32-0.42)   |                                |                               |
|                                     |                                                                                             |                        |            |                      | ≥ 240         | 0.42 (0.38-0.45)      | 0.32 (0.27-0.39)  |                                |                               |

JPHC Study= The Japan Public Health Center-based Prospective Study, ATBC=The Alpha-Tocopherol, Beta-Carotene Cancer Prevention Study, Korean NHIC= The Korean National Health Insurance Corporation Medical Evaluation. \*Tests for linear trend were conducted by treating the total cholesterol as a continuous variable in the multivariable models. **Confounders for adjustment:** 1=age, 2=BMI, 3=smoking, 4=ethanol intake, 5= hypertension, 6=diabetes, 7=hyperlipidemia medication use, 8=total vegetable intake, 9=coffee intake, 10=public health center, 11=intervention, 12=level of education, 13=physical activity, 14=Saturates fat intake, 15=polyunsaturated fat intake, 16=total calorie, 17=serum HDL cholesterol, 18=fasting serum glucose.



**Supplementary Table 4.** Published trials of statin use in treatment of liver cancer

| Studies                                | Study design                                  | Patients population                                           | Intervention                                 | Control                                  | Overall survival of intervention (months) | Overall survival of control (months)                           | Kaplan-Meier and log-rank test         |
|----------------------------------------|-----------------------------------------------|---------------------------------------------------------------|----------------------------------------------|------------------------------------------|-------------------------------------------|----------------------------------------------------------------|----------------------------------------|
| Kawata, 2001, Japan <sup>51</sup>      | Prospective, randomized, open label study     | Patients with advanced liver cancer after TAE procedure, n=83 | Pravastatin 20-40 mg + 5-FU 200 mg QD, n=41  | 5-FU 200 mg QD, n=42                     | Median 18                                 | Median 9                                                       | <i>P</i> = 0.006                       |
| Lersch, 2004, Germany <sup>52</sup>    | Prospective study                             | Patients with advanced liver cancer, n=58                     | Pravastatin 40-80 mg QD, n=20                | A: Octreotide, n=30; B: Gemcitabine, n=8 | Median 7.2 (95% CIs 2.9-11.5)             | A: Median 5 (95% CIs 2.2-7.8); B: Median 3.5 (95% CIs 2.2-4.9) | A: <i>P</i> = 0.09; B: <i>P</i> = 0.03 |
| Graf, 2008, Germany <sup>53</sup>      | Prospective, non-randomized, open label study | Patients with advanced liver cancer after TACE, n=183         | Pravastatin 20-40 mg QD, n=52                | No treatment, n=131                      | Median 20.9 (95% CIs 15.5-26.3)           | Median 20.9 (95% CIs 15.5-26.3)                                | <i>P</i> = 0.003                       |
| Georgescu, 2011, Romania <sup>54</sup> | Prospective, randomized, open label study     | Patients with advanced liver cancer, n=72                     | Lovastatin 40 mg + Sorafenib 400 mg QD, n=39 | Sorafenib 400 mg QD, n=33                | Mean 12.15±0.76                           | Mean 10.85±0.82                                                | Non-significant                        |

TAE = Transcatheter arterial embolization; TACE = Transarterial chemoembolization.

**Supplementary Table 5.** Ongoing clinical trials of statin use in treatment of liver cancer

| Studies          | Year | Location | Phase | Study design                                                                 | Condition                                | Intervention                                                                                       | Control                           | Estimated Enrollment | Resist number                       | Status     |
|------------------|------|----------|-------|------------------------------------------------------------------------------|------------------------------------------|----------------------------------------------------------------------------------------------------|-----------------------------------|----------------------|-------------------------------------|------------|
| ESTAHEP-2010     | 2011 | Spain    | II    | Multicenter, prospective, randomized, double-blind, placebo-controlled study | Advanced liver cancer                    | Sorafenib 400 mg BID + Pravastatin 40 mg, QD                                                       | Sorafenib 400 mg BID + placebo QD | 216                  | NCT01418729; EUCTR2010-024421-21-ES | Recruiting |
| PRODIGE 21       | 2011 | France   | II    | Multicenter, prospective, randomized, open label study                       | Liver cancer with Child-Pugh B Cirrhosis | A: Sorafenib 400 mg BID; B: Pravastatin 40 mg, QD; C: Sorafenib 400 mg BID + Pravastatin 40 mg, QD | Best supportive care              | 160                  | NCT01357486                         | Recruiting |
| JOUVE PHRCK 2009 | 2013 | France   | III   | prospective, randomized, open label study                                    | Liver cancer with Child-Pugh A Cirrhosis | Sorafenib 800 mg BID + Pravastatin 40 mg, QD                                                       | Sorafenib 800 mg BID              | 474                  | NCT01903694; NCT01075555            | Recruiting |



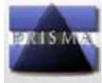

# PRISMA 2009 Checklist

| Section/topic                      | #  | Checklist item                                                                                                                                                                                                                                                                                              | Reported on page # |
|------------------------------------|----|-------------------------------------------------------------------------------------------------------------------------------------------------------------------------------------------------------------------------------------------------------------------------------------------------------------|--------------------|
| <b>TITLE</b>                       |    |                                                                                                                                                                                                                                                                                                             |                    |
| Title                              | 1  | Identify the report as a systematic review, meta-analysis, or both.                                                                                                                                                                                                                                         | 1                  |
| <b>ABSTRACT</b>                    |    |                                                                                                                                                                                                                                                                                                             |                    |
| Structured summary                 | 2  | Provide a structured summary including, as applicable: background; objectives; data sources; study eligibility criteria, participants, and interventions; study appraisal and synthesis methods; results; limitations; conclusions and implications of key findings; systematic review registration number. | 2                  |
| <b>INTRODUCTION</b>                |    |                                                                                                                                                                                                                                                                                                             |                    |
| Rationale                          | 3  | Describe the rationale for the review in the context of what is already known.                                                                                                                                                                                                                              | 3                  |
| Objectives                         | 4  | Provide an explicit statement of questions being addressed with reference to participants, interventions, comparisons, outcomes, and study design (PICOS).                                                                                                                                                  | 4                  |
| <b>METHODS</b>                     |    |                                                                                                                                                                                                                                                                                                             |                    |
| Protocol and registration          | 5  | Indicate if a review protocol exists, if and where it can be accessed (e.g., Web address), and, if available, provide registration information including registration number.                                                                                                                               | no                 |
| Eligibility criteria               | 6  | Specify study characteristics (e.g., PICOS, length of follow-up) and report characteristics (e.g., years considered, language, publication status) used as criteria for eligibility, giving rationale.                                                                                                      | 4-5                |
| Information sources                | 7  | Describe all information sources (e.g., databases with dates of coverage, contact with study authors to identify additional studies) in the search and date last searched.                                                                                                                                  | 4                  |
| Search                             | 8  | Present full electronic search strategy for at least one database, including any limits used, such that it could be repeated.                                                                                                                                                                               | 4                  |
| Study selection                    | 9  | State the process for selecting studies (i.e., screening, eligibility, included in systematic review, and, if applicable, included in the meta-analysis).                                                                                                                                                   | 4                  |
| Data collection process            | 10 | Describe method of data extraction from reports (e.g., piloted forms, independently, in duplicate) and any processes for obtaining and confirming data from investigators.                                                                                                                                  | 5                  |
| Data items                         | 11 | List and define all variables for which data were sought (e.g., PICOS, funding sources) and any assumptions and simplifications made.                                                                                                                                                                       | 5                  |
| Risk of bias in individual studies | 12 | Describe methods used for assessing risk of bias of individual studies (including specification of whether this was done at the study or outcome level), and how this information is to be used in any data synthesis.                                                                                      | 5-6                |
| Summary measures                   | 13 | State the principal summary measures (e.g., risk ratio, difference in means).                                                                                                                                                                                                                               | 6                  |
| Synthesis of results               | 14 | Describe the methods of handling data and combining results of studies, if done, including measures of consistency (e.g., $I^2$ for each meta-analysis)                                                                                                                                                     | 6                  |

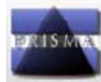

## PRISMA 2009 Checklist

Page 1 of 2

| Section/topic                 | #  | Checklist item                                                                                                                                                                                           | Reported on page # |
|-------------------------------|----|----------------------------------------------------------------------------------------------------------------------------------------------------------------------------------------------------------|--------------------|
| Risk of bias across studies   | 15 | Specify any assessment of risk of bias that may affect the cumulative evidence (e.g., publication bias, selective reporting within studies).                                                             | 6                  |
| Additional analyses           | 16 | Describe methods of additional analyses (e.g., sensitivity or subgroup analyses, meta-regression), if done, indicating which were pre-specified.                                                         | 6                  |
| <b>RESULTS</b>                |    |                                                                                                                                                                                                          |                    |
| Study selection               | 17 | Give numbers of studies screened, assessed for eligibility, and included in the review, with reasons for exclusions at each stage, ideally with a flow diagram.                                          | 7                  |
| Study characteristics         | 18 | For each study, present characteristics for which data were extracted (e.g., study size, PICOS, follow-up period) and provide the citations.                                                             | 7, 19, 20          |
| Risk of bias within studies   | 19 | Present data on risk of bias of each study and, if available, any outcome level assessment (see item 12).                                                                                                | 8, Suppl. Table 1  |
| Results of individual studies | 20 | For all outcomes considered (benefits or harms), present, for each study: (a) simple summary data for each intervention group (b) effect estimates and confidence intervals, ideally with a forest plot. | Figure 2           |
| Synthesis of results          | 21 | Present results of each meta-analysis done, including confidence intervals and measures of consistency.                                                                                                  | 8                  |
| Risk of bias across studies   | 22 | Present results of any assessment of risk of bias across studies (see Item 15).                                                                                                                          | 8                  |
| Additional analysis           | 23 | Give results of additional analyses, if done (e.g., sensitivity or subgroup analyses, meta-regression [see Item 16]).                                                                                    | 8-10               |
| <b>DISCUSSION</b>             |    |                                                                                                                                                                                                          |                    |
| Summary of evidence           | 24 | Summarize the main findings including the strength of evidence for each main outcome; consider their relevance to key groups (e.g., healthcare providers, users, and policy makers).                     | 10-11              |
| Limitations                   | 25 | Discuss limitations at study and outcome level (e.g., risk of bias), and at review-level (e.g., incomplete retrieval of identified research, reporting bias).                                            | 11-13              |
| Conclusions                   | 26 | Provide a general interpretation of the results in the context of other evidence, and implications for future research.                                                                                  | 14                 |
| <b>FUNDING</b>                |    |                                                                                                                                                                                                          |                    |
| Funding                       | 27 | Describe sources of funding for the systematic review and other support (e.g., supply of data); role of funders for the systematic review.                                                               | NA                 |

From: Moher D, Liberati A, Tetzlaff J, Altman DG, The PRISMA Group (2009). Preferred Reporting Items for Systematic Reviews and Meta-Analyses: The PRISMA Statement. PLoS Med 6(6): e1000097. doi:10.1371/journal.pmed1000097

For more information, visit: [www.prisma-statement.org](http://www.prisma-statement.org).  
 For peer review only - <http://bmjopen.bmj.com/site/about/guidelines.xhtml>  
 Page 2 of 2

# BMJ Open

## Statin use and risk of liver cancer: an update meta-analysis

|                                 |                                                                                                                                                                                                                                                                                                                                                                                                                                                                                   |
|---------------------------------|-----------------------------------------------------------------------------------------------------------------------------------------------------------------------------------------------------------------------------------------------------------------------------------------------------------------------------------------------------------------------------------------------------------------------------------------------------------------------------------|
| Journal:                        | <i>BMJ Open</i>                                                                                                                                                                                                                                                                                                                                                                                                                                                                   |
| Manuscript ID:                  | bmjopen-2014-005399.R1                                                                                                                                                                                                                                                                                                                                                                                                                                                            |
| Article Type:                   | Research                                                                                                                                                                                                                                                                                                                                                                                                                                                                          |
| Date Submitted by the Author:   | 24-Jul-2014                                                                                                                                                                                                                                                                                                                                                                                                                                                                       |
| Complete List of Authors:       | Shi, Meng; Nanfang Hospital, Southern Medical University, Department of Gastroenterology<br>Zheng, Huiling; Nanfang Hospital, Southern Medical University, Department of Gastroenterology<br>Gong, Wei; Nanfang Hospital, Southern Medical University, Department of Gastroenterology<br>Nie, Biao; Nanfang Hospital, Southern Medical University, Department of Gastroenterology<br>Cui, Xiaobing; Nanfang Hospital, Southern Medical University, Department of Gastroenterology |
| <b>Primary Subject Heading</b>: | Epidemiology                                                                                                                                                                                                                                                                                                                                                                                                                                                                      |
| Secondary Subject Heading:      | Epidemiology, Gastroenterology and hepatology, Oncology                                                                                                                                                                                                                                                                                                                                                                                                                           |
| Keywords:                       | Gastrointestinal tumours < GASTROENTEROLOGY, Epidemiology < ONCOLOGY, Hepatobiliary tumours < ONCOLOGY                                                                                                                                                                                                                                                                                                                                                                            |
|                                 |                                                                                                                                                                                                                                                                                                                                                                                                                                                                                   |

SCHOLARONE™  
Manuscripts

only

## Statin use and risk of liver cancer: an update meta-analysis

Meng Shi<sup>1</sup>, Huiling Zheng<sup>1</sup>, Wei Gong<sup>1</sup>, Biao Nie<sup>1</sup> and Xiaobing Cui<sup>1\*</sup>

<sup>1</sup>Guangdong Provincial Key Laboratory of Gastroenterology, Department of Gastroenterology, Nanfang Hospital, Southern Medical University, No. 1838 Guangzhou Avenue North, Guangzhou 510515, China

**\*Corresponding author:** Dr. Xiaobing Cui, Tel.: +86-13631312723, Fax: +86-20-87280770, E-mail: xbing119@gmail.com.

**Running title:** Meta-analysis: statin and liver cancer

**Key words:** *Statin; Liver cancer; Cancer Prevention; Meta-analysis.*

**Abstract**

**Objective:** Statins are commonly prescribed cholesterol-lowering drugs. Preclinical studies suggest that statins may possess cancer preventive properties. The primary objective of this meta-analysis was to determine the association between the statin use and the risk of liver cancer.

**Design:** Meta-analysis.

**Setting:** International.

**Participants:** A comprehensive literature search of PubMed, BIOSIS Previews, Web of Science, EMBASE, EBSCO and Cochrane Library was conducted through March 2014. The effect estimate was reported as pooled relative risk (RR) with 95% confidence intervals (CIs), using the random-effects model.

**Results:** A total of 12 studies (one individual patient data analysis of 22 randomized controlled trials, 5 cohorts, and 6 case-controls) were qualified for this meta-analysis, involving 5,640,313 participants including 35,756 liver cancer cases. Our results indicated a significant risk reduction of liver cancer among all statin users (RR 0.58, 95%CIs 0.51–0.67). The difference of the study designs can partly explained the significant heterogeneity found in the overall analysis ( $I^2 = 65\%$ ,  $P = 0.0006$ ). No evidence of publication bias was observed in this meta-analysis. Similar risk reductions were found in the subgroups analysis of Western and Asian countries, lipophilic and hydrophilia statins. There was a trend toward more risk reductions in subgroups with higher baseline risk, inadequate adjustment, and higher cumulative dosage of statin use.

1  
2  
3  
4 **Conclusions:** This meta-analysis suggests that the statin is associated with a  
5  
6 significant risk reduction of liver cancer, when taken daily for cardiovascular event  
7  
8 prevention. However, this preventive effect might be overestimated due to the  
9  
10 exposure period, the indication and contraindication of statins, and other confounders.  
11  
12  
13  
14 Statins might be considered as an adjuvant in the treatment of liver cancer.

### 17 **Strengths and limitations of this study**

18  
19  
20 Statins are commonly prescribed as cholesterol-lowering drugs. In this comprehensive  
21  
22 meta-analysis, we demonstrate that the statin use is associated with a significant risk  
23  
24 reduction of liver cancer.  
25  
26

27  
28 The difference of the study designs is the part reason that explained the significant  
29  
30 heterogeneity found in the overall analysis.  
31

32  
33 However, this preventive effect might be overestimated due to the exposure period,  
34  
35 the indication and contraindication of statins, and other confounders.  
36

37  
38 Statins might be considered as an adjuvant in the treatment of liver cancer.  
39  
40  
41  
42  
43  
44  
45  
46  
47  
48  
49  
50  
51  
52  
53  
54  
55  
56  
57  
58  
59  
60

## Introduction

Statins are inhibitors of 3-hydroxy-3-methylglutaryl coenzyme-A (HMG-CoA) reductase and they are widely used to reduce the plasma cholesterol level and the risk of cardiovascular events.<sup>1</sup> Although there is a concern over their possible carcinogenicity raised in rodent studies,<sup>2</sup> preclinical studies indicate that statins have anticancer properties *in vitro* and *in vivo*, through inhibiting angiogenesis, inducing apoptosis, and suppressing tumor growth and metastasis.<sup>3-5</sup>

However, higher concentrations of statins are typically required to induce these effects, raising questions concerning the therapeutic relevance of statins on cancer.<sup>6</sup>

To date, clinical studies regarding the cancer incidence associated with statin administration have highlighted conflicting results. Moreover, a large number of meta-analyses have concluded that there was no association between statin use and risk of overall cancer,<sup>7-10</sup> or cancer of breast<sup>11</sup>, stomach,<sup>12</sup> or pancreas.<sup>13</sup> There is only a modest protective effect of statins in prostate cancer<sup>14</sup> and colorectal cancer.<sup>15</sup>

In contrary, recent studies reported encouraging results for risk reduction of liver cancer among all statin users. Previous meta-analysis, conducted by Singh *et al.* by including 10 studies, found that statin users were less likely to develop hepatocellular carcinoma (HCC) than statin non-users.<sup>16</sup> However, Singh *et al.* included the ALERT, LIPS, and MEGA trials twice, by including three individual patient data (IPD) analysis of randomized controlled trials (RCTs).<sup>17-19</sup> Meanwhile, some factors of stratification were not considered in their analyses, such as dose and timing of exposure to statins, and the selection of controls and confounders, which might limit

1  
2  
3 the evaluation of cancer risk.<sup>20</sup> Furthermore, the lipophilic statins are accompanied by  
4  
5 an extensive first-pass effect at the hepatic level.<sup>21</sup> It is plausible that lipophilic statins  
6  
7 may have a better liver cancer preventive qualities than the hydrophilic ones.<sup>22</sup>  
8  
9

10  
11 Therefore, we performed this updated meta-analysis to assess the association between  
12  
13 the statin use and the risk of liver cancer, involving the recently published studies and  
14  
15 conducting more subgroup analyses based on the factors mentioned above. Our results  
16  
17 demonstrated that statin use was associated with an over 40% risk reduction in liver  
18  
19 cancer, which may have a significant translational potential in the clinical practice.  
20  
21  
22 However, there were some confounders might overestimate this preventive effect of  
23  
24 statins.  
25  
26  
27

## 28 **MATERIALS AND METHODS**

### 29 *Literature Search strategy*

30  
31 This meta-analysis was conducted following the PRISMA guidelines.<sup>23</sup>  
32  
33

34  
35 The systematic computerized search for eligible studies were performed on the  
36  
37 database of PubMed, BIOSIS Previews, Web of Science, EMBASE, EBSCO, and  
38  
39 Cochrane Library, covering all studies published from their inception to March 5,  
40  
41 2014. The following terms were searched with both the subjects (MeSH terms) and  
42  
43 text-word search strategies: “(Statin OR HMG-CoA reductase inhibitors OR  
44  
45 Atorvastatin OR Cerivastatin OR Fluvastatin OR Lovastatin OR Pravastatin OR  
46  
47 Rosuvastatin OR Simvastatin) AND (Hepatocellular OR Hepatic OR Intrahepatic OR  
48  
49 Interlobular OR Liver) AND (Carcinoma OR Sarcomas OR Angiosarcoma OR Cancer  
50  
51 OR Neoplasm). Additionally, the relevant reviews and retrieved articles were searched  
52  
53  
54  
55  
56  
57  
58  
59  
60



1  
2  
3  
4 manually for more eligible studies.

5  
6 In study searching, only the original researches, published in form of peer review  
7  
8 article or meeting abstract, were included. No language restrictions were imposed.  
9  
10  
11 However, the studies we included were all published in English.  
12

### 13 ***Study selection***

14  
15 The inclusion criteria were: (1) randomized controlled trial (RCTs), cohort studies or  
16  
17 case-control studies; (2) original studies that assessed the effect of statin use on the  
18  
19 risk of liver cancer, compared with placebo or no treatment; (3) liver cancer cases  
20  
21 were identified according to the International Classification of Diseases codes (ICD);  
22  
23 and (4) studies with estimate of relative risk (risk ratio, RR) of liver cancer, or with  
24  
25 data sufficient to calculate it.  
26  
27  
28  
29

30  
31 The exclusion criteria were: (1) study design not meeting the inclusion criteria; (2)  
32  
33 studies without estimate of RR, or without sufficient data to calculate it; or (3) studies  
34  
35 with duplicated or overlap reports.  
36  
37  
38

### 39 ***Data extraction***

40  
41 Two independent investigators (M. Shi and X.B. Cui) extracted data from the eligible  
42  
43 studies using a predefined data collection form. The differences of data extraction  
44  
45 were resolved by consensus referring back to the original article. The extracted  
46  
47 information included: (1) Studies: first author, year of publication, study design,  
48  
49 location, patient populations, period, and follow-up; (2) Statins: type, dosage or  
50  
51 duration of statin use; (3) liver cancer: case identification, number of liver cancer,  
52  
53 crude RR with 95% confidence intervals (CIs), adjusted RR reflecting the greatest  
54  
55  
56  
57  
58  
59  
60

1  
2  
3  
4 degree of control for confounders, and confounders for adjustment (including  
5  
6 variables for matching). When the RR were not available, the RR with 95% CIs were  
7  
8 calculated from the raw data in original studies.  
9

10  
11 We extracted different measurements of effect estimates from original studies, such as  
12  
13 Relative Risk (RR), Odds Ratio (OR), Hazard Ratio (HR), and Observed/Expected  
14  
15 ratio. Due to the fact that the incidence of liver cancer was low in all studies, these  
16  
17 different measurements can be used to provide similar estimates of RR.  
18  
19

### 20 21 ***Methodological quality assessment*** 22

23  
24 Of note, the included RCT was pooled analysis of other RCTs, therefore, it is  
25  
26 inappropriate to assess the methodological quality. The methodological quality of  
27  
28 cohort and case-control studies were assessed on the Newcastle-Ottawa Scale,<sup>24</sup>  
29  
30 including eight items that were categorized three categories: selection (four items, one  
31  
32 star each), comparability (one item, up to two stars), and exposure/outcome (three  
33  
34 items, one star each). A “star” presents a “high” quality choice of each item.  
35  
36  
37  
38

### 39 ***Statistical analysis*** 40

41  
42 The overall meta-analysis was first performed, followed by the subgroup analyses,  
43  
44 based on study design, baseline risk of liver cancer, confounding adjustment, study  
45  
46 location, and pharmacokinetic. Meanwhile, we conducted subgroup analyses based on  
47  
48 studies which reported RR estimate for higher cumulative dosage of statin use, when  
49  
50 appropriate data were available.  
51  
52

53  
54 To take into account the heterogeneity and provide a more conservative estimate, the  
55  
56 inverse variance method was used to estimate the pooled RR and corresponding 95%  
57  
58  
59  
60

1  
2  
3  
4 CIs, and data were pooled using a random effects model. Heterogeneity was assessed  
5  
6 using the Chi-squared statistic ( $P$ ) together with the Higgins I-squared statistic ( $I^2$ ), a  
7  
8  $P$  value  $<0.10$  was considered statistically significant for heterogeneity; and an  $I^2$   
9  
10 value  $> 50\%$  was considered a measure of severe heterogeneity.<sup>25</sup>

11  
12  
13  
14 Publication bias was assessed using the Begg's test and the Egger's test.<sup>26</sup> Influence  
15  
16 analysis was performed to investigate the influence of a single study on the overall  
17  
18 meta-analysis estimate, by omitting one study in each turn. Test for interaction was  
19  
20 applied to identify the difference between pooled RR from subgroup analysis using  
21  
22 the method described by Altman and Bland.<sup>27</sup> All statistical tests were two-sided and  
23  
24  $P < 0.05$  was considered statistically significant, unless otherwise specified. Software  
25  
26 Review Manager (RevMan5.2, Copenhagen) and STATA (Stata 11.2, Texas) were  
27  
28 used for the statistical analysis.  
29  
30  
31  
32

## 33 34 **Results**

### 35 36 ***Study selection***

37  
38  
39 **Figure 1** illustrated the process of study selection for the meta-analysis. Of the 1424  
40  
41 potentially relevant references identified by electric and manual search, 142 were  
42  
43 selected for full-text review after screening titles and abstracts. Finally, a total of 12  
44  
45 studies were included, with one IPD analysis,<sup>19</sup> five cohort studies,<sup>28-32</sup> and six  
46  
47 case-control studies.<sup>33-38</sup> One case-control study was presented solely in abstract  
48  
49 form.<sup>33</sup>  
50  
51  
52

53  
54 Of note, the cohort study conducted by Friedman *et al.* reported RR estimate  
55  
56 separately for different gender (male and female),<sup>29</sup> we considered these two reports  
57  
58  
59  
60

1  
2  
3  
4 as separate studies. Therefore, a total of thirteen reports were included for the present  
5  
6 meta-analysis.  
7

### 8 *Study characteristics*

9  
10 **Table 1** summarized the characteristics of qualified studies in this meta-analysis. The  
11  
12 12 studies, involving 5,640,313 participants with 35,756 liver cancer cases, were  
13  
14 published between 2005 and 2013. The “RCT” in the present study was pooled  
15  
16 analysis of 22 clinical trials,<sup>19</sup> which investigated statins therapy in cardiovascular  
17  
18 event prevention and reported the occurrence of liver cancer as adverse event. The  
19  
20 observational studies were conducted with the local or national health databases, the  
21  
22 statin exposure were identified by linkage to prescription databases, and the controls  
23  
24 were matched mainly by age, sex and index date. Except one cohort adopted ICD-10  
25  
26 C22,<sup>28</sup> all other studies identified liver cancer cases according to the ICD-9 155. Of  
27  
28 note, two cohorts were restricted to patients with HBV infection,<sup>31</sup> and HCV  
29  
30 infection;<sup>32</sup> one case-control only included patients with diabetes mellitus;<sup>34</sup> two  
31  
32 observational studies included patients aged at least 45 years.<sup>30 35</sup>  
33  
34  
35  
36  
37  
38  
39  
40

41 **Table 2** summarized the data of the included studies. In the RCT<sup>19</sup> and one cohort  
42  
43 study,<sup>30</sup> the RR with 95% CIs were calculated from the 2×2 tables defined by the  
44  
45 incidence of liver cancer and the statin use status. The observational studies reported  
46  
47 different measurements of RR estimates with adjustment by confounders. Several  
48  
49 observational studies adopted the important risk factors of liver cancer for  
50  
51 adjustments<sup>31 32 34-36</sup>, such as HBV infection, HCV infection, cirrhosis, alcoholic liver  
52  
53 disease, or non-alcoholic fatty liver disease (NAFLD).<sup>39</sup> Of note, only two studies  
54  
55  
56  
57  
58  
59  
60

1  
2  
3 adjusted for the cholesterol level,<sup>30 38</sup> and no study adjusted for the metabolic  
4  
5  
6 syndrome, which might also influence the risk of liver cancer.<sup>39</sup>  
7

### 8 9 *Methodological quality*

10  
11 For the cohort and case-control studies, the median score was 7 on the  
12  
13 Newcastle-Ottawa Scale, with a range of 5 to 8 (**Supplementary Table 1**). These  
14  
15 results indicated that the observational studies were in a reasonable good quality.  
16  
17

### 18 19 *Overall meta-analysis*

20  
21 **Figure 2** depicted the forest plot of RR estimate with 95% CIs from individual studies  
22  
23 and overall meta-analysis. In the overall meta-analysis, pooled results showed a  
24  
25 statistically significant decrease in the liver cancer risk among all statin users (RR  
26  
27 0.58, 95%CIs 0.51–0.67). Of note, a statistically significant heterogeneity was  
28  
29 observed ( $I^2 = 65%$ ,  $P = 0.0006$ ). The  $P$ -values of Begg's test and Egger's test were  
30  
31 0.669 and 0.749, respectively, both suggesting there was no evidence of publication  
32  
33 bias. In the influence analysis, the omission of any individual studies did not alter the  
34  
35 direction and magnitude of the observed effect (**Supplementary Figure 1**).  
36  
37  
38  
39

### 40 41 *Subgroup analyses and Test for interaction*

42  
43 We first performed preplanned subgroup analyses based on study design, baseline risk  
44  
45 of liver cancer, confounding adjustment, and study location (**Table 3**).  
46  
47

48  
49 The RCT showed there is no significant association between statin use and risk of  
50  
51 liver cancer (RR 1.06, 0.66–1.71). But the observational studies indicated a significant  
52  
53 decrease of liver cancer risk among all statin users (RR 0.57, 0.50–0.64;  $I^2 = 61%$ ,  $P =$   
54  
55 0.003) (**Figure 2**). Furthermore, we found a greater risk reduction in the subgroup  
56  
57  
58  
59  
60

1  
2  
3  
4 analysis of cohort studies (RR 0.51, 0.44–0.58;  $I^2 = 18\%$ ,  $P = 0.30$ ) than in the  
5  
6 case-control studies (RR 0.63, 0.54–0.73;  $I^2 = 46\%$ ,  $P = 0.10$ ) (**Supplementary**  
7  
8 **Figure 2**).

9  
10 Test for interaction showed significant results between subgroups of the RCT and  
11  
12 observational studies ( $P_{\text{interaction}} = 0.01$ ,  $Z = 2.47$ ), and between subgroups of the  
13  
14 cohort and case-control studies ( $P_{\text{interaction}} = 0.04$ ,  $Z = -2.03$ ). These results indicated  
15  
16 that the difference of the study designs was the part reason that why there was severe  
17  
18 heterogeneity in the overall analysis (**Table 3**).

19  
20 In the subgroup analysis of the four studies with higher baseline risk of liver  
21  
22 cancer,<sup>30-32 35</sup> defined as patients with older age, HBV or HCV infection, there was a  
23  
24 trend toward more decrease of liver cancer risk (RR 0.52, 0.47-0.59;  $I^2 = 16\%$ ,  $P =$   
25  
26 0.31) than in the other eight studies with general population<sup>19 28 29 33 34 36-38</sup> (RR 0.63,  
27  
28 0.52–0.75;  $I^2 = 59\%$ ,  $P = 0.01$ ) (**Supplementary Figure 3**).

29  
30 We defined the RCT or studies adjusted for at least 4 of 7 important confounders,  
31  
32 such as HBV infection, HCV infection, cirrhosis, alcoholic liver disease, NAFLD,  
33  
34 HBV treatment, or HCV treatment,<sup>39</sup> were adjusted adequately. Subgroup analysis of  
35  
36 these six studies<sup>19 31 32 34-36</sup> found a trend toward less decrease of liver cancer risk (RR  
37  
38 0.64, 0.53-0.77;  $I^2 = 81\%$   $P = 0.0001$ ) than the other six studies<sup>28-30 33 37 38</sup> (RR, 0.51,  
39  
40 0.43-0.60;  $I^2 = 3\%$ ,  $P = 0.40$ ) (**Supplementary Figure 4**).

41  
42 Subgroup analyses based on study location found a similar risk reduction of liver  
43  
44 cancer in the Western countries (RR 0.61, 0.48–0.76;  $I^2 = 64\%$ ,  $P = 0.007$ ) and in the  
45  
46 Asian countries (RR 0.56, 0.48–0.64;  $I^2 = 51\%$ ,  $P = 0.09$ ). (**Supplementary Figure 5**)  
47  
48  
49  
50  
51  
52  
53  
54  
55  
56  
57  
58  
59  
60

1  
2  
3  
4 Besides the overall RR estimates, some studies reported different RR estimate for  
5  
6 different pharmacokinetic and dosage of statin use (**Supplementary Table 2**). We  
7  
8 conducted further subgroup analyses based on these available data.  
9

10  
11 According to the different pharmacokinetic, statins can be classified as lipophilic  
12  
13 statins (Atorvastatin, Fluvastatin, Lovastatin, and Simvastatin) and hydrophilia statins  
14  
15 (Pravastatin and Rosuvastatin).<sup>21</sup> Subgroup analysis of lipophilic statins<sup>29 31 34-36</sup>  
16  
17 found a significant decrease of liver cancer risk (RR 0.57, 0.50–0.65;  $I^2 = 50%$ ,  $P =$   
18  
19 0.08). And there was a similar result among users of hydrophilia statins<sup>31 35 36</sup> (RR  
20  
21 0.59, 0.41–0.84;  $I^2 = 50%$ ,  $P = 0.13$ ) (**Supplementary Figure 6**).  
22  
23

24  
25 Test for interaction showed non-significant results for subgroups with different  
26  
27 baseline risk, confounding adjustment, study location, or pharmacokinetic ( $P_{\text{interaction}} =$   
28  
29 0.08, 0.08, 0.54 and 0.86, respectively) (**Table 3**). Therefore, there is no strong  
30  
31 evidence to support a different preventive effect of statins on liver cancer in these  
32  
33 subgroups.  
34  
35

36  
37 Subgroup analysis of six studies with higher cumulative dose of statin use, defined as  
38  
39 statin use more than 180 cumulative defined daily dose (cDDD) or 0.5 years  
40  
41 (cumulative duration), showed a trend toward more risk reduction of liver cancer (RR  
42  
43 0.53, 0.36-0.79), but with a high degree of heterogeneity ( $I^2 = 90%$ ,  $P < 0.00001$ )  
44  
45 (**Supplementary Figure 7**).  
46  
47  
48  
49

## 50 51 **Discussion**

52  
53 This present meta-analysis represents the most comprehensive review to date on the  
54  
55 association between the statin use and the liver cancer risk, by including 12 studies  
56  
57  
58  
59  
60

1  
2  
3  
4 (one IPD analysis of 22 RCTs, 5 cohort studies, and 6 case-control studies) and  
5  
6 involving 5,640,313 participants with 35,756 liver cancer cases. Overall, we found  
7  
8 that statin use was associated with an over 40% risk reduction in liver cancer  
9  
10 compared with nonusers (RR 0.58, 95%CI 0.51–0.67). This result was in line with the  
11  
12 previous three meta-analyses: Singh *et al.* included 10 studies and suggested statin  
13  
14 users were less likely to develop HCC (OR 0.63, 95%CI 0.52–0.76),<sup>16</sup> Pradelli *et al.*  
15  
16 and Zhang *et al.* included 5 and 7 observational studies and found a summary RR of  
17  
18 0.58 (95%CI 0.46–0.74) and 0.61 (95%CI 0.49–0.76), respectively.<sup>40 41</sup>

19  
20 The IPD analysis of 22 RCTs showed there is no significant association between statin  
21  
22 use and risk of liver cancer. The significant risk reduction of liver cancer among all  
23  
24 statin users was seen primarily in the observational studies, and this preventive effect  
25  
26 was relatively convinced in the cohorts than in the case-controls. There were some  
27  
28 reasons to explain the different findings between RCTs and observational studies.  
29  
30

31  
32 First, the exposure period to statins might be shorter than the period to carcinogenesis  
33  
34 and the latency to diagnosis in the cohorts and the case-controls. The observational  
35  
36 studies defined statin use varying in dosage and duration, from patients who received  
37  
38  $\geq 1$  cDDD or  $>1$  Rx of statins to more than 0.5 years (**Table 1**). On the other hand, the  
39  
40 median period of statin use was 5.1 years in the RCTs. Although there was a trend  
41  
42 toward more risk reduction of liver cancer with higher cumulative dose of statin use,  
43  
44 this defect might still result in overestimating the cancer-preventive effect of statins in  
45  
46 the observational studies.  
47  
48

49  
50 Second, clinical studies demonstrated that higher serum total cholesterol  
51  
52  
53  
54  
55  
56  
57  
58  
59  
60



1  
2  
3  
4 concentration was associated with decreased risk of liver cancer (**Supplementary**  
5  
6 **Table 3**).<sup>42-44</sup> Meanwhile, there were inverse association between use of non-statin  
7  
8 lipid-lowering drugs and risk of the liver cancer.<sup>35 38</sup> Meanwhile, because of the  
9  
10 contraindication, statins might not prescribed to the patients with the chronic liver  
11  
12 disease, which is known as a risk factor of liver cancer. Unfortunately, the  
13  
14 observational studies included in this analysis seldom adopted these factors for  
15  
16 adjustment. Actually, subgroup analysis of studies with adequate adjustment showed a  
17  
18 trend toward less risk reduction, indicating the potential of overestimate this  
19  
20 preventive effect by confounders.  
21  
22  
23  
24

25  
26 Third, the RCTs included lower risk population (patients with cardiovascular disease  
27  
28 rather than HBV /HCV infection), might not be powerful enough to investigate the  
29  
30 liver cancer outcomes, which were much rarer than cardiovascular events. In addition,  
31  
32 subgroup analysis of studies with higher baseline risk showed a trend toward more  
33  
34 decrease of liver cancer risk.  
35  
36  
37  
38

39 These reasons suggested that the observed modulation of cancer incidence cannot be  
40  
41 ascribable to a direct statin-mediated effect,<sup>20</sup> the exposure period, the indication (e.g.  
42  
43 hyperlipidemia) and contraindication (e.g. chronic liver disease) of statins might  
44  
45 overestimate its cancer-preventive effect.  
46  
47  
48

49 We found similar results in Western countries and Asian countries, which were  
50  
51 different from the meta-analysis conducted by Singh *et al.* which concluded that the  
52  
53 inverse association of statins with HCC was stronger in the Asian population.  
54  
55 Considering four more studies we included, this difference might be caused by the  
56  
57  
58  
59  
60

1  
2  
3  
4 insufficient data in their meta-analysis. Based on the pharmacokinetics, it is plausible  
5  
6 that lipophilic and hydrophilic statins will differ in their liver cancer prevention  
7  
8 qualities.<sup>21 22</sup> However, subgroup analysis of lipophilic and hydrophilic statins showed  
9  
10 similar results.  
11

12  
13 Besides the limitations described previously, there were some other limitations should  
14  
15 be noted. First, a significant heterogeneity was observed in the present meta-analysis,  
16  
17 which might results from the difference in study design. Results of subgroup analyses  
18  
19 would also be limited by this heterogeneity. Second, the adherence to statin therapy is  
20  
21 known to be associated with healthy lifestyle, which might affect the cancer  
22  
23 outcome.<sup>45</sup> Such information is hard to be captured in databases or medical record in  
24  
25 the observational studies.<sup>46</sup> Third, five observational studies were conducted using the  
26  
27 Taiwanese National Health Insurance Research Database (NHIRD),<sup>31 32 35-37</sup> although  
28  
29 they were not in the same period, these studies might contain overlapping groups of  
30  
31 patients. These limitations mentioned above might lead to confounding of overall  
32  
33 results from the present study, and should be considered in future studies aiming at  
34  
35 confirming the protective effects of statins on human cancer risk.  
36  
37

38  
39 The strengths of our meta-analysis were as follows: First, we performed a much more  
40  
41 comprehensive search and more subgroup analyses, compared with the previous  
42  
43 meta-analyses; Second, the methodological quality of the included studies were  
44  
45 reasonable good; Third, publication bias, which due to the tendency of not publishing  
46  
47 small studies with null results, were not found in our meta-analysis.  
48  
49

50  
51 Of note, preclinical studies have indicated that statins possess synergism with other  
52  
53  
54  
55

1  
2  
3  
4 therapeutic agents *in vitro* and *in vivo* for liver cancer.<sup>47 48</sup> Some clinical studies have  
5  
6 also demonstrated that statins would prolong survival in patients with advanced liver  
7  
8 cancer (**Supplementary Table 4**),<sup>49-52</sup> and associated with risk reduction of  
9  
10 recurrence after curative surgery in patients of HBV related HCC.<sup>53</sup> Therefore,  
11  
12 considerable interest exists in adjunctive therapy with statins for liver cancer. In fact,  
13  
14 there were some RCTs ongoing to determine the effectiveness of pravastatin, when  
15  
16 used in combination with sorafenib, in the treatment of liver cancer (**Supplementary**  
17  
18 **Table 5**).

19  
20  
21  
22  
23  
24 Currently, physicians are less likely to prescribe statins for patients with chronic liver  
25  
26 disease, based on the concerns about the statin-induced liver injury.<sup>31</sup> However, there  
27  
28 were number of studies have demonstrated the safe use, even salutary effects.<sup>54-56</sup>  
29  
30  
31 Meanwhile, the risk of serious statin-related liver injury appears to be no greater than  
32  
33 the background incidence of this rare event.<sup>57</sup> Therefore, considering their benefits for  
34  
35 cardiovascular event prevention and the potential effect in liver cancer prevention and  
36  
37 treatment, statins should not be denied to these patients.  
38  
39

40  
41 In conclusion, our results suggest that statin use is associated with a significant risk  
42  
43 reduction of liver cancer, when taken daily for cardiovascular event prevention.  
44  
45 However, this preventive effect might be overestimated due to the exposure period,  
46  
47 indication and contraindication of statins, and other confounders. Statins might be  
48  
49 considered as an adjuvant in the treatment of liver cancer.  
50  
51  
52  
53  
54  
55  
56  
57  
58  
59  
60

**ACKNOWLEDGEMENT**

We thank Medjaden Bioscience Limited and Gui Lv for assisting in the preparation and revision of this manuscript.

**CONTRIBUTORSHIP STATEMENT**

XB Cui had the original idea, Meng Shi and XB Cui worked together to develop an appropriate theoretical framework and design. XB Cui developed the search, Meng Shi and XB Cui were involved in the selection process. Meng Shi and XB Cui extracted relevant data, XB Cui and Biao Nie performed the statistical analysis and all authors were involved in the data interpretation. Meng Shi and Biao Nie wrote the manuscript draft and revised the draft based on input from the other authors. All authors revised it critically for content and approved the final version.

**COMPETING INTERESTS**

There are no competing interests

**FUNDING**

None.

**DATA SHARING**

No additional data available.

**REFERENCES:**

1. Baigent C, Keech A, Kearney PM, *et al.* Efficacy and safety of cholesterol-lowering treatment: prospective meta-analysis of data from 90,056 participants in 14 randomised trials of statins. *Lancet* 2005;**366**(9493):1267-78.
2. Newman TB, Hulley SB. Carcinogenicity of lipid-lowering drugs. *JAMA* 1996;**275**(1):55-60.
3. Demierre MF, Higgins PD, Gruber SB, *et al.* Statins and cancer prevention. *Nat Rev Cancer* 2005;**5**(12):930-42.
4. Zeichner S, Mihos CG, Santana O. The pleiotropic effects and therapeutic potential of the hydroxy-methyl-glutaryl-CoA reductase inhibitors in malignancies: A comprehensive review. *J Cancer Res Ther* 2012;**8**(2):176-83.
5. Lonardo A, Loria P. Potential for statins in the chemoprevention and management of hepatocellular carcinoma. *J Gastroenterol Hepatol* 2012;**27**(11):1654-64.
6. Shimoyama S. Statins are logical candidates for overcoming limitations of targeting therapies on malignancy: their potential application to gastrointestinal cancers. *Cancer Chemother Pharmacol* 2011;**67**(4):729-39.
7. Dale KM, Coleman CI, Henyan NN, *et al.* Statins and cancer risk: a meta-analysis. *JAMA* 2006;**295**(1):74-80.
8. Browning DRL, Martin RM. Statins and risk of cancer: A systematic review and metaanalysis. *Int J Cancer* 2007;**120**(4):833-43.
9. Kuoppala J, Lamminpaa A, Pukkala E. Statins and cancer: A systematic review and meta-analysis. *Eur J Cancer* 2008;**44**(15):2122-32.
10. Baigent C, Blackwell L, Emberson J, *et al.* Efficacy and safety of more intensive lowering of LDL cholesterol: a meta-analysis of data from 170,000 participants in 26 randomised trials. *Lancet* 2010;**376**(9753):1670-81.
11. Undela K, Srikanth V, Bansal D. Statin use and risk of breast cancer: a meta-analysis of observational studies. *Breast Cancer Res Treat* 2012;**135**(1):261-9.
12. Shimoyama S. Statins and gastric cancer risk. *Hepatogastroenterology* 2011;**58**(107-108):1057-61.
13. Cui X, Xie Y, Chen M, *et al.* Statin use and risk of pancreatic cancer: a meta-analysis. *Cancer Causes Control* 2012;**23**(7):1099-111.
14. Bansal D, Undela K, D'Cruz S, *et al.* Statin Use and Risk of Prostate Cancer: A Meta-Analysis of Observational Studies. *PLoS One* 2012;**7**(10):e46691.
15. Bardou M, Barkun A, Martel M. Effect of statin therapy on colorectal cancer. *Gut* 2010;**59**(11):1572-85.
16. Singh S, Singh PP, Singh AG, *et al.* Statins Are Associated With a Reduced Risk of Hepatocellular Cancer: A Systematic Review and Meta-analysis. *Gastroenterology* 2013;**144**(2):323-32.
17. Stein EA, Corsini A, Gimpelewicz CR, *et al.* Fluvastatin treatment is not associated with an increased incidence of cancer. *Int J Clin Pract* 2006;**60**(9):1028-34.
18. Matsushita Y, Sugihara M, Kaburagi J, *et al.* Pravastatin use and cancer risk: a meta-analysis of individual patient data from long-term prospective controlled trials in Japan. *Pharmacoepidemiol Drug Saf* 2010;**19**(2):196-202.
19. Emberson JR, Kearney PM, Blackwell L, *et al.* Lack of effect of lowering LDL cholesterol on cancer: meta-analysis of individual data from 175,000 people in 27 randomised trials of statin therapy.

- 1  
2  
3 PLoS One 2012;**7**(1):e29849.
- 4 20. Gazerro P, Bifulco M. Statins and Cancer in Gastroenterology: New Insight? *Gastroenterology*  
5 2013;**144**(7):1572-3.
- 6  
7 21. Gazerro P, Proto MC, Gangemi G, *et al.* Pharmacological actions of statins: a critical appraisal in  
8 the management of cancer. *Pharmacol Rev* 2012;**64**(1):102-46.
- 9  
10 22. Gronich N, Rennert G. Beyond aspirin - Cancer prevention with statins, metformin and  
11 bisphosphonates. *Nat Rev Clin Oncol* 2013;**10**(11):625-42.
- 12  
13 23. Moher D, Liberati A, Tetzlaff J, *et al.* Preferred reporting items for systematic reviews and  
14 meta-analyses: the PRISMA statement. *BMJ* 2009;**339**:b2535.
- 15  
16 24. GA Wells, B Shea, D O'Connell, *et al.* The Newcastle-Ottawa Scale (NOS) for assessing the quality of  
17 nonrandomised studies in meta-analyses.  
18 [http://www.ohri.ca/programs/clinical\\_epidemiology/oxford.asp](http://www.ohri.ca/programs/clinical_epidemiology/oxford.asp).
- 19  
20 25. Higgins JP, Thompson SG, Deeks JJ, *et al.* Measuring inconsistency in meta-analyses. *BMJ*  
21 2003;**327**(7414):557-60.
- 22  
23 26. METABIAS: Stata module to test for small-study effects in meta-analysis [program], 2009.
- 24  
25 27. Altman DG, Bland JM. Interaction revisited: the difference between two estimates. *BMJ*  
26 2003;**326**(7382):219.
- 27  
28 28. Friis S, Poulsen AH, Johnsen SP, *et al.* Cancer risk among statin users: A population-based cohort  
29 study. *Int J Cancer* 2005;**114**(4):643-7.
- 30  
31 29. Friedman GD, Flick ED, Udaltsova N, *et al.* Screening statins for possible carcinogenic risk: up to 9  
32 years of follow-up of 361,859 recipients. *Pharmacoepidemiol Drug Saf* 2008;**17**(1):27-36.
- 33  
34 30. Marelli C, Gunnarsson C, Ross S, *et al.* Statins and Risk of Cancer A Retrospective Cohort Analysis of  
35 45,857 Matched Pairs From an Electronic Medical Records Database of 11 Million Adult  
36 Americans. *J Am Coll Cardiol* 2011;**58**(5):530-7.
- 37  
38 31. Tsan YT, Lee CH, Wang JD, *et al.* Statins and the risk of hepatocellular carcinoma in patients with  
39 hepatitis B virus infection. *J Clin Oncol* 2012;**30**(6):623-30.
- 40  
41 32. Tsan YT, Lee CH, Ho WC, *et al.* Statins and the risk of hepatocellular carcinoma in patients with  
42 hepatitis C virus infection. *J Clin Oncol* 2013;**31**(12):1514-21.
- 43  
44 33. Khurana V, Saluja A, Caldito G, *et al.* Statins are protective against hepatocellular cancer in patients  
45 with hepatitis C virus infection: Half a million US veterans' study. *Gastroenterology*  
46 2005;**128**(4, Suppl. 2):A714.
- 47  
48 34. El-Serag HB, Johnson ML, Hachem C, *et al.* Statins are associated with a reduced risk of  
49 hepatocellular carcinoma in a large cohort of patients with diabetes. *Gastroenterology*  
50 2009;**136**(5):1601-8.
- 51  
52 35. Chiu HF, Ho SC, Chen CC, *et al.* Statin use and the risk of liver cancer: a population-based  
53 case-control study. *Am J Gastroenterol* 2011;**106**(5):894-8.
- 54  
55 36. Lai SW, Liao KF, Lai HC, *et al.* Statin use and risk of hepatocellular carcinoma. *Eur J Epidemiol*  
56 2013;**28**(6):485-92.
- 57  
58 37. Leung HW, Chan AL, Lo D, *et al.* Common cancer risk and statins: a population-based case-control  
59 study in a Chinese population. *Expert Opin Drug Saf* 2013;**12**(1):19-27.
- 60  
61 38. Chaiteerakij R, Yang JD, Harmsen WS, *et al.* Risk factors for intrahepatic cholangiocarcinoma:  
62 association between metformin use and reduced cancer risk. *Hepatology* 2013;**57**(2):648-55.
- 63  
64 39. Singh S, Singh PP, Roberts LR, *et al.* Chemopreventive strategies in hepatocellular carcinoma. *Nat*  
65 *Rev Gastroenterol Hepatol* 2014;**11**(1):45-54.

- 1
- 2
- 3 40. Pradelli D, Soranna D, Scotti L, *et al.* Statins and primary liver cancer: a meta-analysis of
- 4 observational studies. *Eur J Cancer Prev* 2013;**22**(3):229-34.
- 5
- 6 41. Zhang H, Gao C, Fang L, *et al.* Statin use and risk of liver cancer: A meta-analysis of 7 studies
- 7 involving more than 4.7 million patients. *World J Meta-Anal* 2013;**1**(3):130-7.
- 8
- 9 42. Ahn J, Lim U, Weinstein SJ, *et al.* Prediagnostic total and high-density lipoprotein cholesterol and
- 10 risk of cancer. *Cancer Epidemiol Biomarkers Prev* 2009;**18**(11):2814-21.
- 11
- 12 43. Iso H, Ikeda A, Inoue M, *et al.* Serum cholesterol levels in relation to the incidence of cancer: the
- 13 JPHC study cohorts. *Int J Cancer* 2009;**125**(11):2679-86.
- 14
- 15 44. Kitahara CM, de Gonzalez AB, Freedman ND, *et al.* Total Cholesterol and Cancer Risk in a Large
- 16 Prospective Study in Korea. *J Clin Oncol* 2011;**29**(12):1592-8.
- 17
- 18 45. Brookhart MA, Patrick AR, Dormuth C, *et al.* Adherence to lipid-lowering therapy and the use of
- 19 preventive health services: an investigation of the healthy user effect. *Am J Epidemiol*
- 20 *2007*;**166**(3):348-54.
- 21
- 22 46. Boudreau DM, Yu O, Johnson J. Statin use and cancer risk: a comprehensive review. *Expert Opin*
- 23 *Drug Saf* 2010;**9**(4):603-21.
- 24
- 25 47. Kim W, Yoon JH, Kim JR, *et al.* Synergistic anti-tumor efficacy of lovastatin and protein kinase
- 26 C-beta inhibitor in hepatocellular carcinoma. *Cancer Chemother Pharmacol*
- 27 *2009*;**64**(3):497-507.
- 28
- 29 48. Polo MP, Crespo R, de Bravo MG. Geraniol and simvastatin show a synergistic effect on a human
- 30 hepatocarcinoma cell line. *Cell Biochem Funct* 2011;**29**(6):452-8.
- 31
- 32 49. Kawata S, Yamasaki E, Nagase T, *et al.* Effect of pravastatin on survival in patients with advanced
- 33 hepatocellular carcinoma. A randomized controlled trial. *Br J Cancer* 2001;**84**(7):886-91.
- 34
- 35 50. Lersch C, Schmelz R, Erdmann J, *et al.* Treatment of HCC with pravastatin, octreotide, or
- 36 gemcitabine - A critical evaluation. *Hepatogastroenterology* 2004;**51**(58):1099-103.
- 37
- 38 51. Graf H, Jungst C, Straub G, *et al.* Chemoembolization combined with pravastatin improves survival
- 39 in patients with hepatocellular carcinoma. *Digestion* 2008;**78**(1):34-8.
- 40
- 41 52. Georgescu EF, Badulescu F, Dumitrescu D, *et al.* Lovastatin may enhance cytostatic effects of
- 42 sorafenib in hepatic carcinoma. Primary results of a pilot study. *Hepatol Int* 2011;**5**(1):423.
- 43
- 44 53. Wu CY, Chen YJ, Ho HJ, *et al.* Association between nucleoside analogues and risk of hepatitis B
- 45 virus-related hepatocellular carcinoma recurrence following liver resection. *JAMA*
- 46 *2012*;**308**(18):1906-14.
- 47
- 48 54. Lewis JH, Mortensen ME, Zweig S, *et al.* Efficacy and safety of high-dose pravastatin in
- 49 hypercholesterolemic patients with well-compensated chronic liver disease: Results of a
- 50 prospective, randomized, double-blind, placebo-controlled, multicenter trial. *Hepatology*
- 51 *2007*;**46**(5):1453-63.
- 52
- 53 55. Nelson A, Torres DM, Morgan AE, *et al.* A pilot study using simvastatin in the treatment of
- 54 nonalcoholic steatohepatitis: A randomized placebo-controlled trial. *J Clin Gastroenterol*
- 55 *2009*;**43**(10):990-4.
- 56
- 57 56. Lewis JH. Clinical Perspective: Statins and the Liver-Harmful or Helpful? *Dig Dis Sci*
- 58 *2012*;**57**(7):1754-63.
- 59
- 60 57. Bader T. The myth of statin-induced hepatotoxicity. *Am J Gastroenterol* 2010;**105**(5):978-80.

1  
2  
3  
4  
5  
6  
7  
8  
9 **Figure legends:**

10  
11 **Figure 1.** Flow chart of study selection in the present meta-analysis.

12  
13  
14 **Figure 2.** Overall meta-analysis of the statin use and the liver cancer risk.

15  
16 **Supplementary Figure 1.** Influence analysis.

17  
18  
19 **Supplementary Figure 2.** Subgroup analyses based on study design.

20  
21 **Supplementary Figure 3.** Subgroup analyses based on baseline risk of liver cancer.

22  
23  
24 **Supplementary Figure 4.** Subgroup analyses based on confounder adjustment.

25  
26  
27 **Supplementary Figure 5.** Subgroup analyses based on study location.

28  
29 **Supplementary Figure 6.** Subgroup analyses based on pharmacokinetic of statins.

30  
31  
32 **Supplementary Figure 7.** Subgroup analysis of higher cumulative dose of statin use.



**Table 1.** Study characteristics

| Studies                                  | Study design | Patient population                                                      | Study period | Cases defined | Follow-up      | Statins type         | Dosage/Duration of Statin use |
|------------------------------------------|--------------|-------------------------------------------------------------------------|--------------|---------------|----------------|----------------------|-------------------------------|
| Emberson, 2012, UK <sup>19</sup>         | RCT          | IPD analysis of 22 RCTs                                                 | -            | ICD-9 155     | 5.1 years (Me) | A, F, L, P, R, S     | 5.1 years (Me)                |
| Friis, 2005, North Jutland <sup>28</sup> | Cohort       | General population (CPR)                                                | 1989-2002    | ICD-10 C22    | 3.3 years (M)  | Unspecified          | ≥2 Rx                         |
| Friedman, 2008, USA <sup>29</sup>        | Cohort       | General population (KPMCP)                                              | 1994-2003    | ICD-9-CM 155  | > 2 years      | A, L, S (97.6%)      | ≥1 Rx                         |
| Marelli, 2011, USA <sup>30</sup>         | Cohort       | General older population (men ≥ 45 and women ≥ 55 years; GE Centricity) | 1990-2009    | ICD-9 155     | 4.6 years (M)  | Unspecified          | ≥1 cDDD                       |
| Tsan, 2012, Taiwan <sup>31</sup>         | Cohort       | Patients with HBV infection (NHIRD)                                     | 1997-2008    | ICD-9 155     | 9.9 years (M)  | A, F, L, P, R, and S | ≥28 cDDDs                     |
| Tsan, 2013, Taiwan <sup>32</sup>         | Cohort       | Patients with HCV infection (NHIRD)                                     | 1999-2010    | ICD-9 155     | 10.7 years (M) | A, F, L, P, R, and S | ≥28 cDDDs                     |
| Khurana, 2005, USA <sup>33</sup>         | Case control | General population (VISN)                                               | 1997-2002    | ICD-9 155     | NR             | Unspecified          | ≥1 Rx                         |
| El-Serag, 2009, USA <sup>34</sup>        | Case control | Diabetes patients (VA)                                                  | 1997-2002    | ICD-9-CM 155  | 2.4 years (M)  | A, C, F, L, P, and S | 1.6 years (M)                 |
| Chiu, 2011, Taiwan <sup>35</sup>         | Case control | Older patients (≥ 50 years; NHIRD)                                      | 2005–2008    | ICD-9-CM 155  | NR             | A, F, L, P, R, and S | ≥ 1 cDDD                      |
| Lai, 2013, Taiwan <sup>36</sup>          | Case control | General population (NHIRD)                                              | 2000-2009    | ICD-9-CM 155  | 1.4 years (M)  | A, F, L, P, R, and S | ≥1 Rx                         |
| Leung, 2013, Taiwan <sup>37</sup>        | Case control | General population (NHIRD)                                              | 2000-2008    | ICD-9-CM 155  | 4.1 years (M)  | Unspecified          | > 0.5 years                   |
| Chaiteerakij, 2013, USA <sup>38</sup>    | Case control | Hyperlipidemia patients (Mayo Clinic)                                   | 2000-2010    | ICD-9-CM 155  | >1 years       | Unspecified          | ≥1 Rx                         |

Patients population: IPD = Individual patient data, RCT = randomized controlled trials, CPR = the Central Population Register of Danish citizens, KPMCP = the Kaiser Permanente Medical Care Program in northern California, GE Centricity = the General Electric Centricity database, NHIRD = the Taiwanese National Health Insurance research database, VISN = Veterans Integrated Service Networks 16 Veteran Affairs database, VA = Veterans Affairs national databases, Mayo Clinic = Mayo Clinic (Rochester, MN), HBV = hepatitis B virus; Cases defined: ICD-9 or -10 = International Classification of Diseases, Ninth Revision or Tenth Revision, CM = Clinical Modification; Duration of follow-up: When the follow-up periods of statin user and nonuser were different, only the shorter one was showed, and all periods were transformed to years; Statin type: A = Atorvastatin, C = Cerivastatin, F = Fluvastatin, L = Lovastatin, P = Pravastatin, R = Rosuvastatin, S = Simvastatin, Non-statin = Non-statin cholesterol-lowering drug(s) only; Duration of statin use: M = Mean, Me = Median, ≥1 cDDD = more than 1 cumulative defined daily dose before the diagnosis of liver cancer, Rx = prescriptions.

1  
2  
3  
4  
5  
6  
7  
8  
9  
10  
11  
12  
13  
14  
15  
16  
17  
18  
19  
20  
21  
22  
23  
24  
25  
26  
27  
28  
29  
30  
31  
32  
33  
34  
35  
36  
37  
38  
39  
40  
41  
42  
43  
44  
45  
46  
47  
48  
49

**Table 2.** Study data

| Studies                                   | Intervention/ Cases           |              | Control                       |              | Measurements of effect estimates | Crude RR with 95% CIs | Adjusted RR with 95% CIs | Confounders for adjustment      |
|-------------------------------------------|-------------------------------|--------------|-------------------------------|--------------|----------------------------------|-----------------------|--------------------------|---------------------------------|
|                                           | No. of event/ No. of exposure | No. of total | No. of event/ No. of exposure | No. of total |                                  |                       |                          |                                 |
| Emberson, 2012, UK <sup>19</sup>          | 35                            | 67258        | 33                            | 67279        | RR                               | 1.06 (0.66, 1.71)*    | 1.06 (0.66, 1.71)*       | Randomization                   |
| Friis, 2005, North Jutland <sup>28</sup>  | 1                             | 12251        | 166                           | 334754       | OR                               | NA                    | 1.16 (0.46-2.90)         | 1,2, 16, 21, 23                 |
| Friedman(Male), 2008, USA <sup>29</sup>   | 32                            | 192598       | NA                            | 1904876      | HR                               | NA                    | 0.49 (0.34-0.70)         | 16                              |
| Friedman(Female), 2008, USA <sup>29</sup> | 10                            | 169261       | NA                            | 1976332      | HR                               | NA                    | 0.40 (0.21-0.75)         |                                 |
| Marelli, 2011, USA <sup>30</sup>          | 13                            | 45857        | 24                            | 45857        | RR                               | 0.31 (0.14-0.68)*     | 0.31 (0.14-0.68)*        | 1-5, 14, 16-18, 26, 27          |
| Tsan, 2012, Taiwan <sup>31</sup>          | 58                            | 2785         | 963                           | 30628        | HR                               | 0.66 (0.51- 0.86)     | 0.47 (0.36-0.61)         | 1, 2, 7, 8, 11, 12              |
| Tsan, 2013, Taiwan <sup>32</sup>          | 1378                          | 35023        | 26505                         | 225841       | HR                               | 0.42 (0.39-0.46)      | 0.53 (0.49–0.58)         | 1, 2, 7, 8, 11, 13              |
| Khurana, 2005, USA <sup>33</sup>          | NA                            | NA           | NA                            | NA           | OR                               | NA                    | 0.52 (0.41- 0.67)        | 1, 11, 13                       |
| El-Serag, 2009, USA <sup>34</sup>         | 447                           | 1303         | 2766                          | 5212         | OR                               | 0.46 (0.40-0.52)      | 0.74 (0.64-0.87)         | 1-3, 6, 8, 9, 11-13, 21, 24, 28 |
| Chiu, 2011, Taiwan <sup>35</sup>          | 117                           | 1166         | 195                           | 1166         | OR                               | 0.53 (0.41-0.69)      | 0.62 (0.45-0.83)         | 1, 2, 8, 9, 11, 12, 20, 29      |
| Lai, 2013, Taiwan <sup>36</sup>           | 255                           | 3480         | 1635                          | 13920        | OR                               | 0.61 (0.52–0.72)      | 0.71 (0.56–0.89)         | 1, 2, 8-13, 22, 24, 25          |
| Leung, 2013, Taiwan <sup>37</sup>         | 26                            | 424          | 6851                          | 33781        | HR                               | 0.45 (0.30-0.67)      | 0.44 (0.28, 0.72)        | 1, 2, 11, 15, 20, 21, 23        |
| Chaiteerakij, 2013, USA <sup>38</sup>     | 72                            | 165          | 165                           | 256          | OR                               | NA                    | 0.6 (0.4-0.9)            | 1-3, 8, 11, 17, 22, 28, 30      |

The RR with an asterisk mark (\*) was calculated based on the raw data. The others, crude or adjusted, were extracted from the original paper; Confounders for adjustment: 1 = age, 2 = sex, 3 = race, 4 = BMI, 5 = smoking status, 6 = ethanol intake, 7 = socioeconomic status, 8 = cirrhosis, 9 = alcoholic liver disease, 10 = non-alcoholic fatty liver disease, 11 = diabetes mellitus, 12 = HBV infection, 13 = HCV infection, 14 = concomitant diagnoses (unspecified), 15 = Charlson score, 16 = calendar year, 17 = cholesterol (totalcholesterol, VLDL, LDL, or triglycerides), 18 = prostate-specific antigen, 19 = resection extent, 20 = other lipid-lowering agents, 21 = cardiovascular medications (aspirin, nonsteroidal anti-inflammatory medications, or angiotensin-converting enzymes inhibitors), 22 = metformin or thiazolidinedione, 23 = hormone-replacement therapy, 24 = HCV treatment, 25 = HBV treatment, 26 = medications taken (unspecified), 27 = the number of office visits, 28 = propensity to use statins, 29 = hospital stay, 30 = biliary tract diseases

Table 3. Subgroup analyses of included studies

| Subgroup                           | No. of studies (reports) | Summary RR ( 95% CIs) | Heterogeneity, I <sup>2</sup> | Heterogeneity, P value | P <sub>interaction</sub> |                 |
|------------------------------------|--------------------------|-----------------------|-------------------------------|------------------------|--------------------------|-----------------|
| Study design                       | RCT                      | 1                     | 1.06 (0.66-1.71)              | -                      | -                        | <i>P</i> = 0.01 |
|                                    | Observational studies    | 11(12)                | 0.57(0.50-0.64)               | 61%                    | <i>P</i> = 0.003         |                 |
| Observational studies              | Cohort studies           | 5 (6)                 | 0.51 (0.44–0.58)              | 18%                    | <i>P</i> = 0.30          | <i>P</i> = 0.04 |
|                                    | Case-control studies     | 6                     | 0.63 (0.54–0.73)              | 46%                    | <i>P</i> = 0.10          |                 |
| Baseline risk of liver cancer      | Higher baseline risk     | 4                     | 0.52 (0.47-0.59)              | 16%                    | <i>P</i> = 0.31          | <i>P</i> = 0.08 |
|                                    | General population       | 8 (9)                 | 0.63 (0.52–0.75)              | 59%                    | <i>P</i> = 0.01          |                 |
| Confounding adjustment             | Adequate adjustment      | 6                     | 0.64(0.53-0.77)               | 81%                    | <i>P</i> = 0.0001        | <i>P</i> = 0.08 |
|                                    | Inadequate adjustment    | 6 (7)                 | 0.51 (0.43-0.60)              | 3%                     | <i>P</i> = 0.40          |                 |
| Study location                     | Western studies          | 8 (9)                 | 0.61 (0.48-0.76)              | 64%                    | <i>P</i> = 0.007         | <i>P</i> = 0.54 |
|                                    | Asian studies            | 6                     | 0.56 (0.48- 0.64)             | 51%                    | <i>P</i> = 0.09          |                 |
| Pharmacokinetic                    | Hipophilic statins       | 5 (6)                 | 0.57 (0.50-0.65)              | 50%                    | <i>P</i> = 0.08          | <i>P</i> = 0.86 |
|                                    | Hydrophilia statins      | 3                     | 0.59(0.41–0.84)               | 50%                    | <i>P</i> = 0.13          |                 |
| Higher cumulative dosage of statin |                          | 6                     | 0.53 (0.36-0.79)              | 90%                    | <i>P</i> <0.0001         | -               |

RR = relative risk; higher baseline risk of liver cancer: patients with older age, HBV or HCV infection. Adequate adjustment: RCT or studies which adjusted for at least 4 of 7 important confounders, such as HBV infection, HCV infection, cirrhosis, alcoholic liver disease, NAFLD, HBV treatment, or HCV treatment; Lipophilic statins: Atorvastatin, Fluvastatin, Lovastatin, or Simvastatin; Hydrophilia statins: Pravastatin or Rosuvastatin; Higher cumulative dosage of statin use: > 180cumulative defined daily dose or Duration of statin use > 0.5 years before the diagnosis of liver cancer.

## Statin use and risk of liver cancer: an update meta-analysis

Meng Shi<sup>1</sup>, Huiling Zheng<sup>1</sup>, Wei Gong<sup>1</sup>, **Biao Nie<sup>1</sup>** and Xiaobing Cui<sup>1\*</sup>

<sup>1</sup>Guangdong Provincial Key Laboratory of Gastroenterology, Department of Gastroenterology, Nanfang Hospital, Southern Medical University, No. 1838 Guangzhou Avenue North, Guangzhou 510515, China

**\*Corresponding author:** Dr. Xiaobing Cui, Tel.: +86-13631312723, Fax: +86-20-87280770, E-mail: xbing119@gmail.com.

**Running title:** Meta-analysis: statin and liver cancer

**Key words:** *Statin; Liver cancer; Cancer Prevention; Meta-analysis.*

## Abstract

**Objective:** Statins are commonly prescribed cholesterol-lowering drugs. Preclinical studies suggest that statins may possess cancer preventive properties. **The primary objective of this meta-analysis was to determine the association between the statin use and the risk of liver cancer.**

**Design:** Meta-analysis.

**Setting:** International.

**Participants:** A comprehensive literature search of PubMed, BIOSIS Previews, Web of Science, EMBASE, EBSCO and Cochrane Library was conducted through March 2014. The effect estimate was reported as pooled relative risk (RR) with 95% confidence intervals (CIs), using the random-effects model.

**Results:** **A total of 12 studies (one individual patient data analysis of 22 randomized controlled trials, 5 cohorts, and 6 case-controls) were qualified for this meta-analysis, involving 5,640,313 participants including 35,756 liver cancer cases.** Our results indicated a significant risk reduction of liver cancer among all statin users (RR 0.58, 95%CIs 0.51–0.67). **The difference of the study designs can partly explained the significant heterogeneity found in the overall analysis ( $I^2 = 65%$ ,  $P = 0.0006$ ).** No evidence of publication bias was observed in this meta-analysis. **Similar risk reductions were found in the subgroups analysis of Western and Asian countries, lipophilic and hydrophilia statins. There was a trend toward more risk reductions in subgroups with higher baseline risk, inadequate adjustment, and higher cumulative dosage of statin use.**

1  
2  
3  
4 **Conclusions:** This meta-analysis suggests that the statin is associated with a  
5  
6 significant risk reduction of liver cancer, when taken daily for cardiovascular event  
7  
8 prevention. However, this preventive effect might be overestimated due to the  
9  
10 exposure period, the indication and contraindication of statins, and other confounders.  
11  
12  
13  
14 Statins might be considered as an adjuvant in the treatment of liver cancer.

15  
16 **Key words:** *Statin; Liver cancer; Cancer Prevention; Meta-analysis.*  
17  
18  
19

### 20 21 **Strengths and limitations of this study**

22  
23 Statins are commonly prescribed as cholesterol-lowering drugs. In this comprehensive  
24  
25 meta-analysis, we demonstrate that the statin use is associated with a significant risk  
26  
27 reduction of liver cancer.  
28  
29

30  
31 The difference of the study designs is the part reason that explained the significant  
32  
33 heterogeneity found in the overall analysis.  
34  
35

36  
37 However, this preventive effect might be overestimated due to the exposure period,  
38  
39 the indication and contraindication of statins, and other confounders.  
40

41  
42 Statins might be considered as an adjuvant in the treatment of liver cancer.  
43  
44  
45  
46  
47  
48  
49  
50  
51  
52  
53  
54  
55  
56  
57  
58  
59  
60

## Introduction

Statins are inhibitors of 3-hydroxy-3-methylglutaryl coenzyme-A (HMG-CoA) reductase and they are widely used to reduce the plasma cholesterol level and the risk of cardiovascular events.<sup>1</sup> Although there is a concern over their possible carcinogenicity raised in rodent studies,<sup>2</sup> preclinical studies indicate that statins have anticancer properties *in vitro* and *in vivo*, through inhibiting angiogenesis, inducing apoptosis, and suppressing tumor growth and metastasis.<sup>3-5</sup>

However, higher concentrations of statins are typically required to induce these effects, raising questions concerning the therapeutic relevance of statins on cancer.<sup>6</sup>

To date, clinical studies regarding the cancer incidence associated with statin administration have highlighted conflicting results. Moreover, a large number of meta-analyses have concluded that there was no association between statin use and risk of overall cancer,<sup>7-10</sup> or cancer of breast<sup>11</sup>, stomach,<sup>12</sup> or pancreas.<sup>13</sup> There is only a modest protective effect of statins in prostate cancer<sup>14</sup> and colorectal cancer.<sup>15</sup>

In contrary, recent studies reported encouraging results for risk reduction of liver cancer among all statin users. Previous meta-analysis, conducted by Singh *et al.* by including 10 studies, found that statin users were less likely to develop hepatocellular carcinoma (HCC) than statin non-users.<sup>16</sup> However, Singh *et al.* included the ALERT, LIPS, and MEGA trials twice, by including three individual patient data (IPD) analysis of randomized controlled trials (RCTs).<sup>17-19</sup> Meanwhile, some factors of stratification were not considered in their analyses, such as dose and timing of exposure to statins, and the selection of controls and confounders, which might limit

1  
2  
3 the evaluation of cancer risk.<sup>20</sup> Furthermore, the lipophilic statins are accompanied by  
4 an extensive first-pass effect at the hepatic level.<sup>21</sup> It is plausible that lipophilic statins  
5 may have a better liver cancer preventive qualities than the hydrophilic ones.<sup>22</sup>  
6  
7

8  
9 Therefore, we performed this updated meta-analysis to assess the association between  
10 the statin use and the risk of liver cancer, involving the recently published studies and  
11 conducting more subgroup analyses based on the factors mentioned above. Our results  
12 demonstrated that statin use was associated with an over 40% risk reduction in liver  
13 cancer, which may have a significant translational potential in the clinical practice.  
14  
15 However, there were some confounders might overestimate this preventive effect of  
16 statins.  
17  
18  
19  
20  
21  
22  
23  
24  
25  
26  
27

## 28 **MATERIALS AND METHODS**

### 29 *Literature Search strategy*

30  
31 This meta-analysis was conducted following the PRISMA guidelines.<sup>23</sup>  
32

33  
34 The systematic computerized search for eligible studies were performed on the  
35 database of PubMed, BIOSIS Previews, Web of Science, EMBASE, EBSCO, and  
36 **Cochrane Library**, covering all studies published from their inception to March 5,  
37 2014. The following terms were searched with both the subjects (MeSH terms) and  
38 text-word search strategies: “(Statin OR HMG-CoA reductase inhibitors OR  
39 Atorvastatin OR Cerivastatin OR Fluvastatin OR Lovastatin OR Pravastatin OR  
40 Rosuvastatin OR Simvastatin) AND (Hepatocellular OR Hepatic OR Intrahepatic OR  
41 Interlobular OR Liver) AND (Carcinoma OR Sarcomas OR Angiosarcoma OR Cancer  
42 OR Neoplasm). Additionally, the relevant reviews and retrieved articles were searched  
43  
44  
45  
46  
47  
48  
49  
50  
51  
52  
53  
54  
55  
56  
57  
58  
59  
60



1  
2  
3  
4 manually for more eligible studies.

5  
6 In study searching, only the original researches, published in form of peer review  
7  
8 article or meeting abstract, were included. No language restrictions were imposed.  
9  
10  
11 However, the studies we included were all published in English.  
12

### 13 ***Study selection***

14  
15  
16 The inclusion criteria were: (1) randomized controlled trial (RCTs), cohort studies or  
17  
18 case-control studies; (2) original studies that assessed the effect of statin use on the  
19  
20 risk of liver cancer, compared with placebo or no treatment; (3) liver cancer cases  
21  
22 were identified according to the International Classification of Diseases codes (ICD);  
23  
24 and (4) studies with estimate of relative risk (risk ratio, RR) of liver cancer, or with  
25  
26 data sufficient to calculate it.  
27  
28

29  
30  
31 The exclusion criteria were: (1) study design not meeting the inclusion criteria; (2)  
32  
33 studies without estimate of RR, or without sufficient data to calculate it; or (3) studies  
34  
35 with duplicated or overlap reports.  
36  
37

### 38 ***Data extraction***

39  
40  
41 Two independent investigators (M. Shi and X.B. Cui) extracted data from the eligible  
42  
43 studies using a predefined data collection form. The differences of data extraction  
44  
45 were resolved by consensus referring back to the original article. The extracted  
46  
47 information included: (1) Studies: first author, year of publication, study design,  
48  
49 location, patient populations, period, and follow-up; (2) Statins: type, dosage or  
50  
51 duration of statin use; (3) liver cancer: case identification, number of liver cancer,  
52  
53 crude RR with 95% confidence intervals (CIs), adjusted RR reflecting the greatest  
54  
55  
56  
57  
58  
59  
60

1  
2  
3  
4 degree of control for confounders, and confounders for adjustment (including  
5  
6 variables for matching). When the RR were not available, the RR with 95% CIs were  
7  
8 calculated from the raw data in original studies.  
9

10  
11 We extracted different measurements of effect estimates from original studies, such as  
12  
13 Relative Risk (RR), Odds Ratio (OR), Hazard Ratio (HR), and Observed/Expected  
14  
15 ratio. Due to the fact that the incidence of liver cancer was low in all studies, these  
16  
17 different measurements can be used to provide similar estimates of RR.  
18  
19

### 20 21 *Methodological quality assessment*

22  
23 Of note, the included RCT was pooled analysis of other RCTs, therefore, it is  
24  
25 inappropriate to assess the methodological quality. The methodological quality of  
26  
27 cohort and case-control studies were assessed on the Newcastle-Ottawa Scale,<sup>24</sup>  
28  
29 including eight items that were categorized three categories: selection (four items, one  
30  
31 star each), comparability (one item, up to two stars), and exposure/outcome (three  
32  
33 items, one star each). A “star” presents a “high” quality choice of each item.  
34  
35  
36  
37  
38

### 39 *Statistical analysis*

40  
41 The overall meta-analysis was first performed, followed by the subgroup analyses,  
42  
43 based on study design, baseline risk of liver cancer, confounding adjustment, study  
44  
45 location, and pharmacokinetic. Meanwhile, we conducted subgroup analyses based on  
46  
47 studies which reported RR estimate for higher cumulative dosage of statin use, when  
48  
49 appropriate data were available.  
50  
51

52  
53 To take into account the heterogeneity and provide a more conservative estimate, the  
54  
55 inverse variance method was used to estimate the pooled RR and corresponding 95%  
56  
57  
58  
59  
60

1  
2  
3  
4  
5  
6  
7  
8  
9  
10  
11  
12  
13  
14  
15  
16  
17  
18  
19  
20  
21  
22  
23  
24  
25  
26  
27  
28  
29  
30  
31  
32  
33  
34  
35  
36  
37  
38  
39  
40  
41  
42  
43  
44  
45  
46  
47  
48  
49  
50  
51  
52  
53  
54  
55  
56  
57  
58  
59  
60

CI, and data were pooled using a random effects model. Heterogeneity was assessed using the Chi-squared statistic ( $P$ ) together with the Higgins I-squared statistic ( $I^2$ ), a  $P$  value  $<0.10$  was considered statistically significant for heterogeneity; and an  $I^2$  value  $> 50\%$  was considered a measure of severe heterogeneity.<sup>25</sup>

Publication bias was assessed using the Begg's test and the Egger's test.<sup>26</sup> Influence analysis was performed to investigate the influence of a single study on the overall meta-analysis estimate, by omitting one study in each turn. Test for interaction was applied to identify the difference between pooled RR from subgroup analysis using the method described by Altman and Bland.<sup>27</sup> All statistical tests were two-sided and  $P < 0.05$  was considered statistically significant, unless otherwise specified. Software Review Manager (RevMan5.2, Copenhagen) and STATA (Stata 11.2, Texas) were used for the statistical analysis.

## Results

### Study selection

Figure 1 illustrated the process of study selection for the meta-analysis. Of the 1424 potentially relevant references identified by electric and manual search, 142 were selected for full-text review after screening titles and abstracts. Finally, a total of 12 studies were included, with one IPD analysis,<sup>19</sup> five cohort studies,<sup>28-32</sup> and six case-control studies.<sup>33-38</sup> One case-control study was presented solely in abstract form.<sup>33</sup>

Of note, the cohort study conducted by Friedman *et al.* reported RR estimate separately for different gender (male and female),<sup>29</sup> we considered these two reports

1  
2  
3  
4 as separate studies. Therefore, a total of thirteen reports were included for the present  
5  
6 meta-analysis.  
7

### 8 *Study characteristics*

9  
10 **Table 1** summarized the characteristics of qualified studies in this meta-analysis. **The**  
11  
12 **12 studies, involving 5,640,313 participants with 35,756 liver cancer cases,** were  
13  
14 published between 2005 and 2013. **The “RCT” in the present study was pooled**  
15  
16 **analysis of 22 clinical trials,<sup>19</sup>** which investigated statins therapy in cardiovascular  
17  
18 event prevention and reported the occurrence of liver cancer as adverse event. The  
19  
20 observational studies were conducted with the local or national health databases, the  
21  
22 statin exposure were identified by linkage to prescription databases, and the controls  
23  
24 were matched mainly by age, sex and index date. Except one cohort adopted ICD-10  
25  
26 C22,<sup>28</sup> all other studies identified liver cancer cases according to the ICD-9 155. Of  
27  
28 note, **two cohorts were restricted to patients with HBV infection,<sup>31</sup> and HCV**  
29  
30 **infection;<sup>32</sup> one case-control only included patients with diabetes mellitus;<sup>34</sup> two**  
31  
32 **observational studies included patients aged at least 45 years.<sup>30 35</sup>**  
33  
34  
35  
36  
37  
38  
39  
40

41 **Table 2** summarized the data of the included studies. In the RCT<sup>19</sup> and one cohort  
42  
43 study,<sup>30</sup> the RR with 95% CIs were calculated from the 2×2 tables defined by the  
44  
45 incidence of liver cancer and the statin use status. The observational studies reported  
46  
47 different measurements of RR estimates with adjustment by confounders. **Several**  
48  
49 **observational studies adopted the important risk factors of liver cancer for**  
50  
51 **adjustments<sup>31 32 34-36</sup>,** such as HBV infection, HCV infection, cirrhosis, alcoholic liver  
52  
53 **disease, or non-alcoholic fatty liver disease (NAFLD).<sup>39</sup>** Of note, only two studies  
54  
55  
56  
57  
58  
59  
60

1  
2  
3  
4  
5  
6  
7  
8  
9  
10  
11  
12  
13  
14  
15  
16  
17  
18  
19  
20  
21  
22  
23  
24  
25  
26  
27  
28  
29  
30  
31  
32  
33  
34  
35  
36  
37  
38  
39  
40  
41  
42  
43  
44  
45  
46  
47  
48  
49  
50  
51  
52  
53  
54  
55  
56  
57  
58  
59  
60

adjusted for the cholesterol level,<sup>30 38</sup> and no study adjusted for the metabolic syndrome, which might also influence the risk of liver cancer.<sup>39</sup>

### *Methodological quality*

For the cohort and case-control studies, the median score was 7 on the Newcastle-Ottawa Scale, with a range of 5 to 8 (Supplementary Table 1). These results indicated that the observational studies were in a reasonable good quality.

### *Overall meta-analysis*

Figure 2 depicted the forest plot of RR estimate with 95% CIs from individual studies and overall meta-analysis. In the overall meta-analysis, pooled results showed a statistically significant decrease in the liver cancer risk among all statin users (RR 0.58, 95% CIs 0.51–0.67). Of note, a statistically significant heterogeneity was observed ( $I^2 = 65%$ ,  $P = 0.0006$ ). The  $P$ -values of Begg's test and Egger's test were 0.669 and 0.749, respectively, both suggesting there was no evidence of publication bias. In the influence analysis, the omission of any individual studies did not alter the direction and magnitude of the observed effect (Supplementary Figure 1).

### *Subgroup analyses and Test for interaction*

We first performed preplanned subgroup analyses based on study design, baseline risk of liver cancer, confounding adjustment, and study location (Table 3).

The RCT showed there is no significant association between statin use and risk of liver cancer (RR 1.06, 0.66–1.71). But the observational studies indicated a significant decrease of liver cancer risk among all statin users (RR 0.57, 0.50–0.64;  $I^2 = 61%$ ,  $P = 0.003$ ) (Figure 2). Furthermore, we found a greater risk reduction in the subgroup

1  
2  
3  
4 analysis of cohort studies (RR 0.51, 0.44–0.58;  $I^2 = 18\%$ ,  $P = 0.30$ ) than in the  
5  
6 case-control studies (RR 0.63, 0.54–0.73;  $I^2 = 46\%$ ,  $P = 0.10$ ) (**Supplementary**  
7  
8 **Figure 2**).

9  
10  
11 Test for interaction showed significant results between subgroups of the RCT and  
12  
13 observational studies ( $P_{\text{interaction}} = 0.01$ ,  $Z = 2.47$ ), and between subgroups of the  
14  
15 cohort and case-control studies ( $P_{\text{interaction}} = 0.04$ ,  $Z = -2.03$ ). These results indicated  
16  
17 that the difference of the study designs was the part reason that why there was severe  
18  
19 heterogeneity in the overall analysis (**Table 3**).

20  
21 In the subgroup analysis of the four studies with higher baseline risk of liver  
22  
23 cancer,<sup>30-32 35</sup> defined as patients with older age, HBV or HCV infection, there was a  
24  
25 trend toward more decrease of liver cancer risk (RR 0.52, 0.47-0.59;  $I^2 = 16\%$ ,  $P =$   
26  
27 0.31) than in the other eight studies with general population<sup>19 28 29 33 34 36-38</sup> (RR 0.63,  
28  
29 0.52–0.75;  $I^2 = 59\%$ ,  $P = 0.01$ ) (**Supplementary Figure 3**).

30  
31 We defined the RCT or studies adjusted for at least 4 of 7 important confounders,  
32  
33 such as HBV infection, HCV infection, cirrhosis, alcoholic liver disease, NAFLD,  
34  
35 HBV treatment, or HCV treatment,<sup>39</sup> were adjusted adequately. Subgroup analysis of  
36  
37 these six studies<sup>19 31 32 34-36</sup> found a trend toward less decrease of liver cancer risk (RR  
38  
39 0.64, 0.53-0.77;  $I^2 = 81\%$   $P = 0.0001$ ) than the other six studies<sup>28-30 33 37 38</sup> (RR, 0.51,  
40  
41 0.43-0.60;  $I^2 = 3\%$ ,  $P = 0.40$ ) (**Supplementary Figure 4**).

42  
43 Subgroup analyses based on study location found a similar risk reduction of liver  
44  
45 cancer in the Western countries (RR 0.61, 0.48–0.76;  $I^2 = 64\%$ ,  $P = 0.007$ ) and in the  
46  
47 Asian countries (RR 0.56, 0.48–0.64;  $I^2 = 51\%$ ,  $P = 0.09$ ). (**Supplementary Figure 5**)  
48  
49  
50  
51  
52  
53  
54  
55  
56  
57  
58  
59  
60

1  
2  
3  
4 Besides the overall RR estimates, some studies reported different RR estimate for  
5  
6 different pharmacokinetic and dosage of statin use (**Supplementary Table 2**). We  
7  
8 conducted further subgroup analyses based on these available data.  
9

10  
11 According to the different pharmacokinetic, statins can be classified as lipophilic  
12  
13 statins (Atorvastatin, Fluvastatin, Lovastatin, and Simvastatin) and hydrophilia statins  
14  
15 (Pravastatin and Rosuvastatin).<sup>21</sup> Subgroup analysis of lipophilic statins<sup>29 31 34-36</sup>  
16  
17 found a significant decrease of liver cancer risk (RR 0.57, 0.50–0.65;  $I^2 = 50\%$ ,  $P =$   
18  
19 0.08). And there was a similar result among users of hydrophilia statins<sup>31 35 36</sup> (RR  
20  
21 0.59, 0.41–0.84;  $I^2 = 50\%$ ,  $P = 0.13$ ) (**Supplementary Figure 6**).  
22  
23

24  
25 Test for interaction showed non-significant results for subgroups with different  
26  
27 baseline risk, confounding adjustment, study location, or pharmacokinetic ( $P_{\text{interaction}} =$   
28  
29 0.08, 0.08, 0.54 and 0.86, respectively) (**Table 3**). Therefore, there is no strong  
30  
31 evidence to support a different preventive effect of statins on liver cancer in these  
32  
33 subgroups.  
34  
35

36  
37 Subgroup analysis of six studies with higher cumulative dose of statin use, defined as  
38  
39 statin use more than 180 cumulative defined daily dose (cDDD) or 0.5 years  
40  
41 (cumulative duration), showed a trend toward more risk reduction of liver cancer (RR  
42  
43 0.53, 0.36-0.79), but with a high degree of heterogeneity ( $I^2 = 90\%$ ,  $P < 0.00001$ )  
44  
45 (**Supplementary Figure 7**).  
46  
47  
48  
49

## 50 51 Discussion

52  
53 This present meta-analysis represents the most comprehensive review to date on the  
54  
55 association between the statin use and the liver cancer risk, **by including 12 studies**  
56  
57  
58  
59  
60

1  
2  
3  
4 (one IPD analysis of 22 RCTs, 5 cohort studies, and 6 case-control studies) and  
5  
6 involving 5,640,313 participants with 35,756 liver cancer cases. Overall, we found  
7  
8 that statin use was associated with an over 40% risk reduction in liver cancer  
9  
10 compared with nonusers (RR 0.58, 95%CI 0.51–0.67). This result was in line with the  
11  
12 previous three meta-analyses: Singh *et al.* included 10 studies and suggested statin  
13  
14 users were less likely to develop HCC (OR 0.63, 95%CI 0.52–0.76),<sup>16</sup> Pradelli *et al.*  
15  
16 and Zhang *et al.* included 5 and 7 observational studies and found a summary RR of  
17  
18 0.58 (95%CI 0.46–0.74) and 0.61 (95%CI 0.49–0.76), respectively.<sup>40 41</sup>

19  
20  
21  
22  
23  
24 The IPD analysis of 22 RCTs showed there is no significant association between statin  
25  
26 use and risk of liver cancer. The significant risk reduction of liver cancer among all  
27  
28 statin users was seen primarily in the observational studies, and this preventive effect  
29  
30 was relatively convinced in the cohorts than in the case-controls. There were some  
31  
32 reasons to explain the different findings between RCTs and observational studies.  
33  
34

35  
36 First, the exposure period to statins might be shorter than the period to carcinogenesis  
37  
38 and the latency to diagnosis in the cohorts and the case-controls. The observational  
39  
40 studies defined statin use varying in dosage and duration, from patients who received  
41  
42  $\geq 1$  cDDD or  $>1$  Rx of statins to more than 0.5 years (**Table 1**). On the other hand, the  
43  
44 median period of statin use was 5.1 years in the RCTs. Although there was a trend  
45  
46 toward more risk reduction of liver cancer with higher cumulative dose of statin use,  
47  
48 this defect might still result in overestimating the cancer-preventive effect of statins in  
49  
50 the observational studies.  
51  
52  
53  
54

55  
56 Second, clinical studies demonstrated that higher serum total cholesterol  
57  
58  
59  
60



1  
2  
3  
4 concentration was associated with decreased risk of liver cancer (**Supplementary**  
5  
6 **Table 3**).<sup>42-44</sup> Meanwhile, there were inverse association between use of non-statin  
7  
8 lipid-lowering drugs and risk of the liver cancer.<sup>35 38</sup> Meanwhile, because of the  
9  
10 contraindication, statins might not prescribed to the patients with the chronic liver  
11  
12 disease, which is known as a risk factor of liver cancer. Unfortunately, the  
13  
14 observational studies included in this analysis seldom adopted these factors for  
15  
16 adjustment. Actually, subgroup analysis of studies with adequate adjustment showed a  
17  
18 trend toward less risk reduction, indicating the potential of overestimate this  
19  
20 preventive effect by confounders.  
21  
22  
23  
24

25  
26 Third, the RCTs included lower risk population (patients with cardiovascular disease  
27  
28 rather than HBV /HCV infection), might not be powerful enough to investigate the  
29  
30 liver cancer outcomes, which were much rarer than cardiovascular events. In addition,  
31  
32 subgroup analysis of studies with higher baseline risk showed a trend toward more  
33  
34 decrease of liver cancer risk.  
35  
36  
37  
38

39 These reasons suggested that the observed modulation of cancer incidence cannot be  
40  
41 ascribable to a direct statin-mediated effect,<sup>20</sup> the exposure period, the indication (e.g.  
42  
43 hyperlipidemia) and contraindication (e.g. chronic liver disease) of statins might  
44  
45 overestimate its cancer-preventive effect.  
46  
47  
48

49 We found similar results in Western countries and Asian countries, which were  
50  
51 different from the meta-analysis conducted by Singh *et al.* which concluded that the  
52  
53 inverse association of statins with HCC was stronger in the Asian population.  
54  
55

56 **Considering four more studies we included,** this difference might be caused by the  
57  
58  
59  
60

1  
2  
3  
4 insufficient data in their meta-analysis. Based on the pharmacokinetics, it is plausible  
5  
6 that lipophilic and hydrophilic statins will differ in their liver cancer prevention  
7  
8 qualities.<sup>21 22</sup> However, subgroup analysis of lipophilic and hydrophilic statins showed  
9  
10 similar results.  
11

12  
13 Besides the limitations described previously, there were some other limitations should  
14  
15 be noted. First, a significant heterogeneity was observed in the present meta-analysis,  
16  
17 which might results from the difference in study design. Results of subgroup analyses  
18  
19 would also be limited by this heterogeneity. Second, the adherence to statin therapy is  
20  
21 known to be associated with healthy lifestyle, which might affect the cancer  
22  
23 outcome.<sup>45</sup> Such information is hard to be captured in databases or medical record in  
24  
25 the observational studies.<sup>46</sup> Third, five observational studies were conducted using the  
26  
27 Taiwanese National Health Insurance Research Database (NHIRD),<sup>31 32 35-37</sup> although  
28  
29 they were not in the same period, these studies might contain overlapping groups of  
30  
31 patients. These limitations mentioned above might lead to confounding of overall  
32  
33 results from the present study, and should be considered in future studies aiming at  
34  
35 confirming the protective effects of statins on human cancer risk.  
36  
37  
38  
39  
40  
41  
42

43  
44 The strengths of our meta-analysis were as follows: First, we performed a much more  
45  
46 comprehensive search and more subgroup analyses, compared with the previous  
47  
48 meta-analyses; Second, the methodological quality of the included studies were  
49  
50 reasonable good; Third, publication bias, which due to the tendency of not publishing  
51  
52 small studies with null results, were not found in our meta-analysis.  
53  
54

55  
56 Of note, preclinical studies have indicated that statins possess synergism with other  
57  
58  
59  
60

1  
2  
3  
4 therapeutic agents *in vitro* and *in vivo* for liver cancer.<sup>47 48</sup> Some clinical studies have  
5  
6 also demonstrated that statins would prolong survival in patients with advanced liver  
7  
8 cancer (**Supplementary Table 4**),<sup>49-52</sup> and associated with risk reduction of  
9  
10 recurrence after curative surgery in patients of HBV related HCC.<sup>53</sup> Therefore,  
11  
12 considerable interest exists in adjunctive therapy with statins for liver cancer. In fact,  
13  
14 there were some RCTs ongoing to determine the effectiveness of pravastatin, when  
15  
16 used in combination with sorafenib, in the treatment of liver cancer (**Supplementary**  
17  
18 **Table 5**).

19  
20  
21  
22  
23  
24 Currently, physicians are less likely to prescribe statins for patients with chronic liver  
25  
26 disease, based on the concerns about the statin-induced liver injury.<sup>31</sup> However, there  
27  
28 were number of studies have demonstrated the safe use, even salutary effects.<sup>54-56</sup>  
29  
30  
31 Meanwhile, the risk of serious statin-related liver injury appears to be no greater than  
32  
33 the background incidence of this rare event.<sup>57</sup> Therefore, considering their benefits for  
34  
35 cardiovascular event prevention and the potential effect in liver cancer prevention and  
36  
37 treatment, statins should not be denied to these patients.  
38  
39

40  
41 In conclusion, our results suggest that statin use is associated with a significant risk  
42  
43 reduction of liver cancer, when taken daily for cardiovascular event prevention.  
44  
45 However, this preventive effect might be overestimated due to the exposure period,  
46  
47 indication and contraindication of statins, and other confounders. Statins might be  
48  
49 considered as an adjuvant in the treatment of liver cancer.  
50  
51  
52

#### 53 54 55 **ACKNOWLEDGEMENT**

56  
57 We thank Medjaden Bioscience Limited and Gui Lv for assisting in the preparation  
58  
59  
60

1  
2  
3 and revision of this manuscript.  
4

#### 5 **CONTRIBUTORSHIP STATEMENT**

6  
7 XB Cui had the original idea, Meng Shi and XB Cui worked together to develop an  
8 appropriate theoretical framework and design. XB Cui developed the search, Meng  
9 Shi and XB Cui were involved in the selection process. Meng Shi and XB Cui  
10 extracted relevant data, XB Cui and Biao Nie performed the statistical analysis and all  
11 authors were involved in the data interpretation. Meng Shi and Biao Nie wrote the  
12 manuscript draft and revised the draft based on input from the other authors. All  
13 authors revised it critically for content and approved the final version.  
14  
15  
16  
17  
18  
19  
20  
21  
22  
23

#### 24 **COMPETING INTERESTS**

25  
26 There are no competing interests  
27  
28

#### 29 **FUNDING**

30  
31 None.  
32  
33

#### 34 **DATA SHARING**

35  
36 No additional data available.  
37  
38  
39  
40  
41  
42

#### 43 **REFERENCES:**

- 44  
45 1. Baigent C, Keech A, Kearney PM, *et al.* Efficacy and safety of cholesterol-lowering treatment:  
46 prospective meta-analysis of data from 90,056 participants in 14 randomised trials of statins.  
47 *Lancet* 2005;**366**(9493):1267-78.  
48  
49 2. Newman TB, Hulley SB. Carcinogenicity of lipid-lowering drugs. *JAMA* 1996;**275**(1):55-60.  
50  
51 3. Demierre MF, Higgins PD, Gruber SB, *et al.* Statins and cancer prevention. *Nat Rev Cancer*  
52 2005;**5**(12):930-42.  
53  
54 4. Zeichner S, Mihos CG, Santana O. The pleiotropic effects and therapeutic potential of the  
55 hydroxy-methyl-glutaryl-CoA reductase inhibitors in malignancies: A comprehensive review. *J*  
56 *Cancer Res Ther* 2012;**8**(2):176-83.  
57  
58 5. Lonardo A, Loria P. Potential for statins in the chemoprevention and management of hepatocellular  
59 carcinoma. *J Gastroenterol Hepatol* 2012;**27**(11):1654-64.  
60

- 1
  - 2
  - 3
  - 4
  - 5
  - 6
  - 7
  - 8
  - 9
  - 10
  - 11
  - 12
  - 13
  - 14
  - 15
  - 16
  - 17
  - 18
  - 19
  - 20
  - 21
  - 22
  - 23
  - 24
  - 25
  - 26
  - 27
  - 28
  - 29
  - 30
  - 31
  - 32
  - 33
  - 34
  - 35
  - 36
  - 37
  - 38
  - 39
  - 40
  - 41
  - 42
  - 43
  - 44
  - 45
  - 46
  - 47
  - 48
  - 49
  - 50
  - 51
  - 52
  - 53
  - 54
  - 55
  - 56
  - 57
  - 58
  - 59
  - 60
6. Shimoyama S. Statins are logical candidates for overcoming limitations of targeting therapies on malignancy: their potential application to gastrointestinal cancers. *Cancer Chemother Pharmacol* 2011;**67**(4):729-39.
7. Dale KM, Coleman CI, Henyan NN, *et al.* Statins and cancer risk: a meta-analysis. *JAMA* 2006;**295**(1):74-80.
8. Browning DRL, Martin RM. Statins and risk of cancer: A systematic review and metaanalysis. *Int J Cancer* 2007;**120**(4):833-43.
9. Kuoppala J, Lamminpaa A, Pukkala E. Statins and cancer: A systematic review and meta-analysis. *Eur J Cancer* 2008;**44**(15):2122-32.
10. Baigent C, Blackwell L, Emberson J, *et al.* Efficacy and safety of more intensive lowering of LDL cholesterol: a meta-analysis of data from 170,000 participants in 26 randomised trials. *Lancet* 2010;**376**(9753):1670-81.
11. Undela K, Srikanth V, Bansal D. Statin use and risk of breast cancer: a meta-analysis of observational studies. *Breast Cancer Res Treat* 2012;**135**(1):261-9.
12. Shimoyama S. Statins and gastric cancer risk. *Hepatogastroenterology* 2011;**58**(107-108):1057-61.
13. Cui X, Xie Y, Chen M, *et al.* Statin use and risk of pancreatic cancer: a meta-analysis. *Cancer Causes Control* 2012;**23**(7):1099-111.
14. Bansal D, Undela K, D'Cruz S, *et al.* Statin Use and Risk of Prostate Cancer: A Meta-Analysis of Observational Studies. *PLoS One* 2012;**7**(10):e46691.
15. Bardou M, Barkun A, Martel M. Effect of statin therapy on colorectal cancer. *Gut* 2010;**59**(11):1572-85.
16. Singh S, Singh PP, Singh AG, *et al.* Statins Are Associated With a Reduced Risk of Hepatocellular Cancer: A Systematic Review and Meta-analysis. *Gastroenterology* 2013;**144**(2):323-32.
17. Stein EA, Corsini A, Gimpelewicz CR, *et al.* Fluvastatin treatment is not associated with an increased incidence of cancer. *Int J Clin Pract* 2006;**60**(9):1028-34.
18. Matsushita Y, Sugihara M, Kaburagi J, *et al.* Pravastatin use and cancer risk: a meta-analysis of individual patient data from long-term prospective controlled trials in Japan. *Pharmacoepidemiol Drug Saf* 2010;**19**(2):196-202.
19. Emberson JR, Kearney PM, Blackwell L, *et al.* Lack of effect of lowering LDL cholesterol on cancer: meta-analysis of individual data from 175,000 people in 27 randomised trials of statin therapy. *PLoS One* 2012;**7**(1):e29849.
20. Gazerro P, Bifulco M. Statins and Cancer in Gastroenterology: New Insight? *Gastroenterology* 2013;**144**(7):1572-3.
21. Gazerro P, Proto MC, Gangemi G, *et al.* Pharmacological actions of statins: a critical appraisal in the management of cancer. *Pharmacol Rev* 2012;**64**(1):102-46.
22. Gronich N, Rennert G. Beyond aspirin - Cancer prevention with statins, metformin and bisphosphonates. *Nat Rev Clin Oncol* 2013;**10**(11):625-42.
23. Moher D, Liberati A, Tetzlaff J, *et al.* Preferred reporting items for systematic reviews and meta-analyses: the PRISMA statement. *BMJ* 2009;**339**:b2535.
24. GA Wells, B Shea, D O'Connell, *et al.* The Newcastle-Ottawa Scale (NOS) for assessing the quality of nonrandomised studies in meta-analyses. [http://www.ohri.ca/programs/clinical\\_epidemiology/oxford.asp](http://www.ohri.ca/programs/clinical_epidemiology/oxford.asp).
25. Higgins JP, Thompson SG, Deeks JJ, *et al.* Measuring inconsistency in meta-analyses. *BMJ* 2003;**327**(7414):557-60.

- 1
- 2
- 3 26. METABIAS: Stata module to test for small-study effects in meta-analysis [program], 2009.
- 4 27. Altman DG, Bland JM. Interaction revisited: the difference between two estimates. *BMJ*
- 5 2003;**326**(7382):219.
- 6
- 7 28. Friis S, Poulsen AH, Johnsen SP, *et al.* Cancer risk among statin users: A population-based cohort
- 8 study. *Int J Cancer* 2005;**114**(4):643-7.
- 9
- 10 29. Friedman GD, Flick ED, Udaltsova N, *et al.* Screening statins for possible carcinogenic risk: up to 9
- 11 years of follow-up of 361,859 recipients. *Pharmacoepidemiol Drug Saf* 2008;**17**(1):27-36.
- 12 30. Marelli C, Gunnarsson C, Ross S, *et al.* Statins and Risk of Cancer A Retrospective Cohort Analysis of
- 13 45,857 Matched Pairs From an Electronic Medical Records Database of 11 Million Adult
- 14 Americans. *J Am Coll Cardiol* 2011;**58**(5):530-7.
- 15 31. Tsan YT, Lee CH, Wang JD, *et al.* Statins and the risk of hepatocellular carcinoma in patients with
- 16 hepatitis B virus infection. *J Clin Oncol* 2012;**30**(6):623-30.
- 17 32. Tsan YT, Lee CH, Ho WC, *et al.* Statins and the risk of hepatocellular carcinoma in patients with
- 18 hepatitis C virus infection. *J Clin Oncol* 2013;**31**(12):1514-21.
- 19 33. Khurana V, Saluja A, Caldito G, *et al.* Statins are protective against hepatocellular cancer in patients
- 20 with hepatitis C virus infection: Half a million US veterans' study. *Gastroenterology*
- 21 2005;**128**(4, Suppl. 2):A714.
- 22 34. El-Serag HB, Johnson ML, Hachem C, *et al.* Statins are associated with a reduced risk of
- 23 hepatocellular carcinoma in a large cohort of patients with diabetes. *Gastroenterology*
- 24 2009;**136**(5):1601-8.
- 25 35. Chiu HF, Ho SC, Chen CC, *et al.* Statin use and the risk of liver cancer: a population-based
- 26 case-control study. *Am J Gastroenterol* 2011;**106**(5):894-8.
- 27 36. Lai SW, Liao KF, Lai HC, *et al.* Statin use and risk of hepatocellular carcinoma. *Eur J Epidemiol*
- 28 2013;**28**(6):485-92.
- 29 37. Leung HW, Chan AL, Lo D, *et al.* Common cancer risk and statins: a population-based case-control
- 30 study in a Chinese population. *Expert Opin Drug Saf* 2013;**12**(1):19-27.
- 31 38. Chaiteerakij R, Yang JD, Harmsen WS, *et al.* Risk factors for intrahepatic cholangiocarcinoma:
- 32 association between metformin use and reduced cancer risk. *Hepatology* 2013;**57**(2):648-55.
- 33 39. Singh S, Singh PP, Roberts LR, *et al.* Chemopreventive strategies in hepatocellular carcinoma. *Nat*
- 34 *Rev Gastroenterol Hepatol* 2014;**11**(1):45-54.
- 35 40. Pradelli D, Soranna D, Scotti L, *et al.* Statins and primary liver cancer: a meta-analysis of
- 36 observational studies. *Eur J Cancer Prev* 2013;**22**(3):229-34.
- 37 41. Zhang H, Gao C, Fang L, *et al.* Statin use and risk of liver cancer: A meta-analysis of 7 studies
- 38 involving more than 4.7 million patients. *World J Meta-Anal* 2013;**1**(3):130-7.
- 39 42. Ahn J, Lim U, Weinstein SJ, *et al.* Prediagnostic total and high-density lipoprotein cholesterol and
- 40 risk of cancer. *Cancer Epidemiol Biomarkers Prev* 2009;**18**(11):2814-21.
- 41 43. Iso H, Ikeda A, Inoue M, *et al.* Serum cholesterol levels in relation to the incidence of cancer: the
- 42 JPHC study cohorts. *Int J Cancer* 2009;**125**(11):2679-86.
- 43 44. Kitahara CM, de Gonzalez AB, Freedman ND, *et al.* Total Cholesterol and Cancer Risk in a Large
- 44 Prospective Study in Korea. *J Clin Oncol* 2011;**29**(12):1592-8.
- 45 45. Brookhart MA, Patrick AR, Dormuth C, *et al.* Adherence to lipid-lowering therapy and the use of
- 46 preventive health services: an investigation of the healthy user effect. *Am J Epidemiol*
- 47 2007;**166**(3):348-54.
- 48 46. Boudreau DM, Yu O, Johnson J. Statin use and cancer risk: a comprehensive review. *Expert Opin*
- 49
- 50
- 51
- 52
- 53
- 54
- 55
- 56
- 57
- 58
- 59
- 60

- 1  
2  
3 Drug Saf 2010;**9**(4):603-21.
- 4 47. Kim W, Yoon JH, Kim JR, *et al.* Synergistic anti-tumor efficacy of lovastatin and protein kinase  
5 C-beta inhibitor in hepatocellular carcinoma. *Cancer Chemother Pharmacol*  
6 2009;**64**(3):497-507.
- 7  
8 48. Polo MP, Crespo R, de Bravo MG. Geraniol and simvastatin show a synergistic effect on a human  
9 hepatocarcinoma cell line. *Cell Biochem Funct* 2011;**29**(6):452-8.
- 10 49. Kawata S, Yamasaki E, Nagase T, *et al.* Effect of pravastatin on survival in patients with advanced  
11 hepatocellular carcinoma. A randomized controlled trial. *Br J Cancer* 2001;**84**(7):886-91.
- 12 50. Lersch C, Schmelz R, Erdmann J, *et al.* Treatment of HCC with pravastatin, octreotide, or  
13 gemcitabine - A critical evaluation. *Hepatogastroenterology* 2004;**51**(58):1099-103.
- 14 51. Graf H, Jungst C, Straub G, *et al.* Chemoembolization combined with pravastatin improves survival  
15 in patients with hepatocellular carcinoma. *Digestion* 2008;**78**(1):34-8.
- 16 52. Georgescu EF, Badulescu F, Dumitrescu D, *et al.* Lovastatin may enhance cytostatic effects of  
17 sorafenib in hepatic carcinoma. Primary results of a pilot study. *Hepatol Int* 2011;**5**(1):423.
- 18 53. Wu CY, Chen YJ, Ho HJ, *et al.* Association between nucleoside analogues and risk of hepatitis B  
19 virus-related hepatocellular carcinoma recurrence following liver resection. *JAMA*  
20 2012;**308**(18):1906-14.
- 21 54. Lewis JH, Mortensen ME, Zweig S, *et al.* Efficacy and safety of high-dose pravastatin in  
22 hypercholesterolemic patients with well-compensated chronic liver disease: Results of a  
23 prospective, randomized, double-blind, placebo-controlled, multicenter trial. *Hepatology*  
24 2007;**46**(5):1453-63.
- 25 55. Nelson A, Torres DM, Morgan AE, *et al.* A pilot study using simvastatin in the treatment of  
26 nonalcoholic steatohepatitis: A randomized placebo-controlled trial. *J Clin Gastroenterol*  
27 2009;**43**(10):990-4.
- 28 56. Lewis JH. Clinical Perspective: Statins and the Liver-Harmful or Helpful? *Dig Dis Sci*  
29 2012;**57**(7):1754-63.
- 30 57. Bader T. The myth of statin-induced hepatotoxicity. *Am J Gastroenterol* 2010;**105**(5):978-80.

### Figure legends:

31  
32  
33  
34  
35  
36  
37  
38  
39  
40  
41  
42  
43  
44  
45  
46  
47  
48  
49  
50  
51  
52  
53  
54  
55  
56  
57  
58  
59  
60

**Figure 1.** Flow chart of study selection in the present meta-analysis.

**Figure 2.** Overall meta-analysis of the statin use and the liver cancer risk.

**Supplementary Figure 1.** Influence analysis.

**Supplementary Figure 2.** Subgroup analyses based on study design.

**Supplementary Figure 3.** Subgroup analyses based on baseline risk of liver cancer.

**Supplementary Figure 4.** Subgroup analyses based on confounder adjustment.

**Supplementary Figure 5.** Subgroup analyses based on study location.

1  
2  
3  
4  
5  
6  
7  
8  
9  
10  
11  
12  
13  
14  
15  
16  
17  
18  
19  
20  
21  
22  
23  
24  
25  
26  
27  
28  
29  
30  
31  
32  
33  
34  
35  
36  
37  
38  
39  
40  
41  
42  
43  
44  
45  
46  
47  
48  
49  
50  
51  
52  
53  
54  
55  
56  
57  
58  
59  
60

**Supplementary Figure 6.** Subgroup analyses based on pharmacokinetic of statins.

**Supplementary Figure 7.** Subgroup analysis of higher cumulative dose of statin use.

For peer review only



**Table 1.** Study characteristics

| Studies                                  | Study design | Patient population                                                      | Study period | Cases defined | Follow-up      | Statins type         | Dosage/Duration of Statin use |
|------------------------------------------|--------------|-------------------------------------------------------------------------|--------------|---------------|----------------|----------------------|-------------------------------|
| Emberson, 2012, UK <sup>19</sup>         | RCT          | IPD analysis of 22 RCTs                                                 | -            | ICD-9 155     | 5.1 years (Me) | A, F, L, P, R, S     | 5.1 years (Me)                |
| Friis, 2005, North Jutland <sup>28</sup> | Cohort       | General population (CPR)                                                | 1989-2002    | ICD-10 C22    | 3.3 years (M)  | Unspecified          | ≥2 Rx                         |
| Friedman, 2008, USA <sup>29</sup>        | Cohort       | General population (KPMCP)                                              | 1994-2003    | ICD-9-CM 155  | > 2 years      | A, L, S (97.6%)      | ≥1 Rx                         |
| Marelli, 2011, USA <sup>30</sup>         | Cohort       | General older population (men ≥ 45 and women ≥ 55 years; GE Centricity) | 1990-2009    | ICD-9 155     | 4.6 years (M)  | Unspecified          | ≥1 cDDD                       |
| Tsan, 2012, Taiwan <sup>31</sup>         | Cohort       | Patients with HBV infection (NHIRD)                                     | 1997-2008    | ICD-9 155     | 9.9 years (M)  | A, F, L, P, R, and S | ≥28 cDDDs                     |
| Tsan, 2013, Taiwan <sup>32</sup>         | Cohort       | Patients with HCV infection (NHIRD)                                     | 1999-2010    | ICD-9 155     | 10.7 years (M) | A, F, L, P, R, and S | ≥28 cDDDs                     |
| Khurana, 2005, USA <sup>33</sup>         | Case control | General population (VISN)                                               | 1997-2002    | ICD-9 155     | NR             | Unspecified          | ≥1 Rx                         |
| El-Serag, 2009, USA <sup>34</sup>        | Case control | Diabetes patients (VA)                                                  | 1997-2002    | ICD-9-CM 155  | 2.4 years (M)  | A, C, F, L, P, and S | 1.6 years (M)                 |
| Chiu, 2011, Taiwan <sup>35</sup>         | Case control | Older patients (≥ 50 years; NHIRD)                                      | 2005–2008    | ICD-9-CM 155  | NR             | A, F, L, P, R, and S | ≥ 1 cDDD                      |
| Lai, 2013, Taiwan <sup>36</sup>          | Case control | General population (NHIRD)                                              | 2000-2009    | ICD-9-CM 155  | 1.4 years (M)  | A, F, L, P, R, and S | ≥1 Rx                         |
| Leung, 2013, Taiwan <sup>37</sup>        | Case control | General population (NHIRD)                                              | 2000-2008    | ICD-9-CM 155  | 4.1 years (M)  | Unspecified          | > 0.5 years                   |
| Chaiteerakij, 2013, USA <sup>38</sup>    | Case control | Hyperlipidemia patients (Mayo Clinic)                                   | 2000-2010    | ICD-9-CM 155  | >1 years       | Unspecified          | ≥1 Rx                         |

Patients population: IPD = Individual patient data, RCT = randomized controlled trials, CPR = the Central Population Register of Danish citizens, KPMCP = the Kaiser Permanente Medical Care Program in northern California, GE Centricity = the General Electric Centricity database, NHIRD = the Taiwanese National Health Insurance research database, VISN = Veterans Integrated Service Networks 16 Veteran Affairs database, VA = Veterans Affairs national databases, Mayo Clinic = Mayo Clinic (Rochester, MN), HBV = hepatitis B virus; Cases defined: ICD-9 or -10 = International Classification of Diseases, Ninth Revision or Tenth Revision, CM = Clinical Modification; Duration of follow-up: When the follow-up periods of statin user and nonuser were different, only the shorter one was showed, and all periods were transformed to years; Statin type: A = Atorvastatin, C = Cerivastatin, F = Fluvastatin, L = Lovastatin, P = Pravastatin, R = Rosuvastatin, S = Simvastatin, Non-statin = Non-statin cholesterol-lowering drug(s) only; Duration of statin use: M = Mean, Me = Median, ≥1 cDDD = more than 1 cumulative defined daily dose before the diagnosis of liver cancer, Rx = prescriptions.

Table 2. Study data

| Studies                                   | Intervention/ Cases           |              | Control                       |              | Measurements of effect estimates | Crude RR with 95% CIs | Adjusted RR with 95% CIs | Confounders for adjustment      |
|-------------------------------------------|-------------------------------|--------------|-------------------------------|--------------|----------------------------------|-----------------------|--------------------------|---------------------------------|
|                                           | No. of event/ No. of exposure | No. of total | No. of event/ No. of exposure | No. of total |                                  |                       |                          |                                 |
| Emberson, 2012, UK <sup>19</sup>          | 35                            | 67258        | 33                            | 67279        | RR                               | 1.06 (0.66, 1.71)*    | 1.06 (0.66, 1.71)*       | Randomization                   |
| Friis, 2005, North Jutland <sup>28</sup>  | 1                             | 12251        | 166                           | 334754       | OR                               | NA                    | 1.16 (0.46-2.90)         | 1,2, 16, 21, 23                 |
| Friedman(Male), 2008, USA <sup>29</sup>   | 32                            | 192598       | NA                            | 1904876      | HR                               | NA                    | 0.49 (0.34-0.70)         | 16                              |
| Friedman(Female), 2008, USA <sup>29</sup> | 10                            | 169261       | NA                            | 1976332      | HR                               | NA                    | 0.40 (0.21-0.75)         |                                 |
| Marelli, 2011, USA <sup>30</sup>          | 13                            | 45857        | 24                            | 45857        | RR                               | 0.31 (0.14-0.68)*     | 0.31 (0.14-0.68)*        | 1-5, 14, 16-18, 26, 27          |
| Tsan, 2012, Taiwan <sup>31</sup>          | 58                            | 2785         | 963                           | 30628        | HR                               | 0.66 (0.51- 0.86)     | 0.47 (0.36-0.61)         | 1, 2, 7, 8, 11, 12              |
| Tsan, 2013, Taiwan <sup>32</sup>          | 1378                          | 35023        | 26505                         | 225841       | HR                               | 0.42 (0.39-0.46)      | 0.53 (0.49-0.58)         | 1, 2, 7, 8, 11, 13              |
| Khurana, 2005, USA <sup>33</sup>          | NA                            | NA           | NA                            | NA           | OR                               | NA                    | 0.52 (0.41- 0.67)        | 1, 11, 13                       |
| El-Serag, 2009, USA <sup>34</sup>         | 447                           | 1303         | 2766                          | 5212         | OR                               | 0.46 (0.40-0.52)      | 0.74 (0.64-0.87)         | 1-3, 6, 8, 9, 11-13, 21, 24, 28 |
| Chiu, 2011, Taiwan <sup>35</sup>          | 117                           | 1166         | 195                           | 1166         | OR                               | 0.53 (0.41-0.69)      | 0.62 (0.45-0.83)         | 1, 2, 8, 9, 11, 12, 20, 29      |
| Lai, 2013, Taiwan <sup>36</sup>           | 255                           | 3480         | 1635                          | 13920        | OR                               | 0.61 (0.52-0.72)      | 0.71 (0.56-0.89)         | 1, 2, 8-13, 22, 24, 25          |
| Leung, 2013, Taiwan <sup>37</sup>         | 26                            | 424          | 6851                          | 33781        | HR                               | 0.45 (0.30-0.67)      | 0.44 (0.28, 0.72)        | 1, 2, 11, 15, 20, 21, 23        |
| Chaiteerakij, 2013, USA <sup>38</sup>     | 72                            | 165          | 165                           | 256          | OR                               | NA                    | 0.6 (0.4-0.9)            | 1-3, 8, 11, 17, 22, 28, 30      |

The RR with an asterisk mark (\*) was calculated based on the raw data. The others, crude or adjusted, were extracted from the original paper; Confounders for adjustment: 1 = age, 2 = sex, 3 = race, 4 = BMI, 5 = smoking status, 6 = ethanol intake, 7 = socioeconomic status, 8 = cirrhosis, 9 = alcoholic liver disease, 10 = non-alcoholic fatty liver disease, 11 = diabetes mellitus, 12 = HBV infection, 13 = HCV infection, 14 = concomitant diagnoses (unspecified), 15 = Charlson score, 16 = calendar year, 17 = cholesterol (totalcholesterol, VLDL, LDL, or triglycerides), 18 = prostate-specific antigen, 19 = resection extent, 20 = other lipid-lowering agents, 21 = cardiovascular medications (aspirin, nonsteroidal anti-inflammatory medications, or angiotensin-converting enzymes inhibitors), 22 = metformin or thiazolidinedione, 23 = hormone-replacement therapy, 24 = HCV treatment, 25 = HBV treatment, 26 = medications taken (unspecified), 27 = the number of office visits, 28 = propensity to use statins, 29 = hospital stay, 30 = biliary tract diseases

Table 3. Subgroup analyses of included studies

| Subgroup                           | No. of studies<br>(reports) | Summary RR ( 95%<br>CIs) | Heterogeneity, I <sup>2</sup> | Heterogeneity, P value | P <sub>interaction</sub> |          |
|------------------------------------|-----------------------------|--------------------------|-------------------------------|------------------------|--------------------------|----------|
| Study design                       | RCT                         | 1                        | 1.06 (0.66-1.71)              | -                      | -                        | P = 0.01 |
|                                    | Observational studies       | 11(12)                   | 0.57(0.50-0.64)               | 61%                    | P = 0.003                |          |
| Observational studies              | Cohort studies              | 5 (6)                    | 0.51 (0.44–0.58)              | 18%                    | P = 0.30                 | P = 0.04 |
|                                    | Case-control studies        | 6                        | 0.63 (0.54–0.73)              | 46%                    | P = 0.10                 |          |
| Baseline risk of liver cancer      | Higher baseline risk        | 4                        | 0.52 (0.47-0.59)              | 16%                    | P = 0.31                 | P = 0.08 |
|                                    | General population          | 8 (9)                    | 0.63 (0.52–0.75)              | 59%                    | P = 0.01                 |          |
| Confounding adjustment             | Adequate adjustment         | 6                        | 0.64(0.53-0.77)               | 81%                    | P = 0.0001               | P = 0.08 |
|                                    | Inadequate adjustment       | 6 (7)                    | 0.51 (0.43-0.60)              | 3%                     | P = 0.40                 |          |
| Study location                     | Western studies             | 8 (9)                    | 0.61 (0.48-0.76)              | 64%                    | P = 0.007                | P = 0.54 |
|                                    | Asian studies               | 6                        | 0.56 (0.48- 0.64)             | 51%                    | P = 0.09                 |          |
| Pharmacokinetic                    | Hipophilic statins          | 5 (6)                    | 0.57 (0.50-0.65)              | 50%                    | P = 0.08                 | P = 0.86 |
|                                    | Hydrophilia statins         | 3                        | 0.59(0.41–0.84)               | 50%                    | P = 0.13                 |          |
| Higher cumulative dosage of statin |                             | 6                        | 0.53 (0.36-0.79)              | 90%                    | P<0.0001                 | -        |

RR = relative risk; higher baseline risk of liver cancer: patients with older age, HBV or HCV infection. Adequate adjustment: RCT or studies which adjusted for at least 4 of 7 important confounders, such as HBV infection, HCV infection, cirrhosis, alcoholic liver disease, NAFLD, HBV treatment, or HCV treatment; Lipophilic statins: Atorvastatin, Fluvastatin, Lovastatin, or Simvastatin; Hydrophilia statins: Pravastatin or Rosuvastatin; Higher cumulative dosage of statin use: > 180cumulative defined daily dose or Duration of statin use > 0.5 years before the diagnosis of liver cancer.

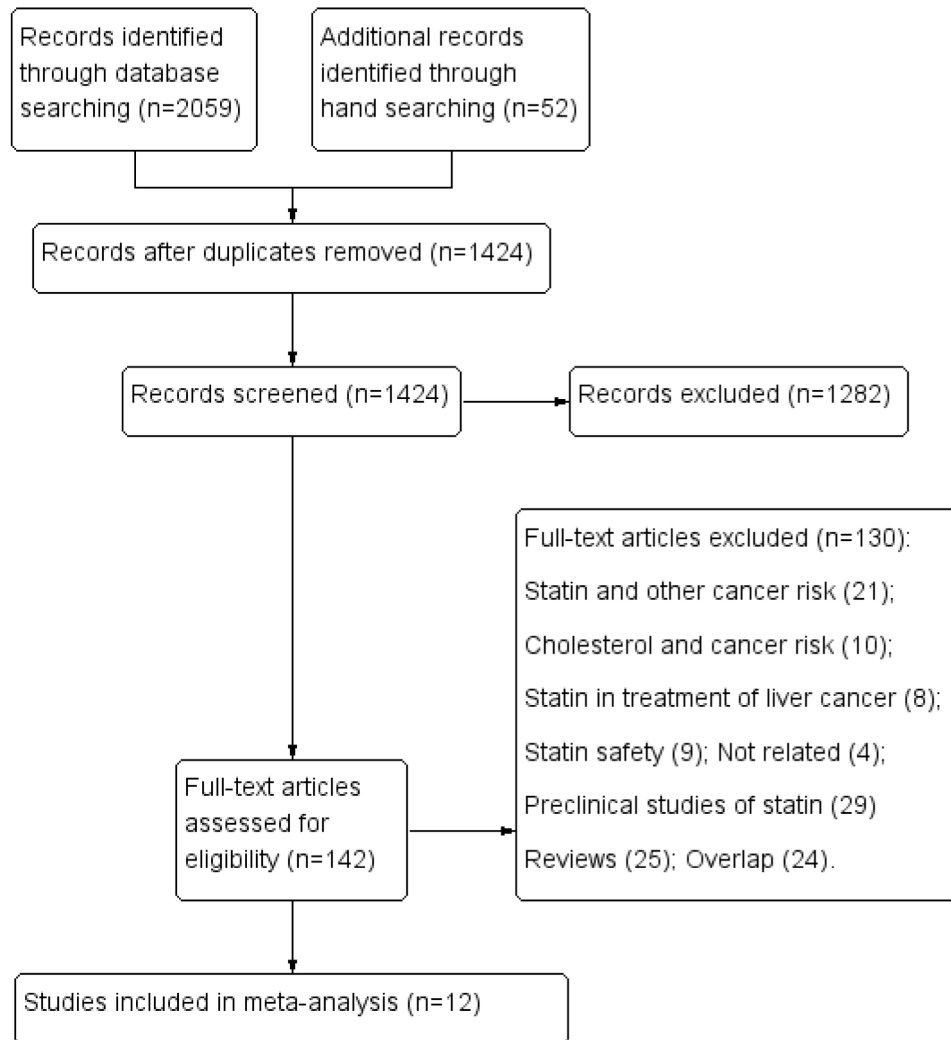

Flow chart of study selection in the present meta-analysis.  
207x224mm (300 x 300 DPI)

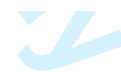

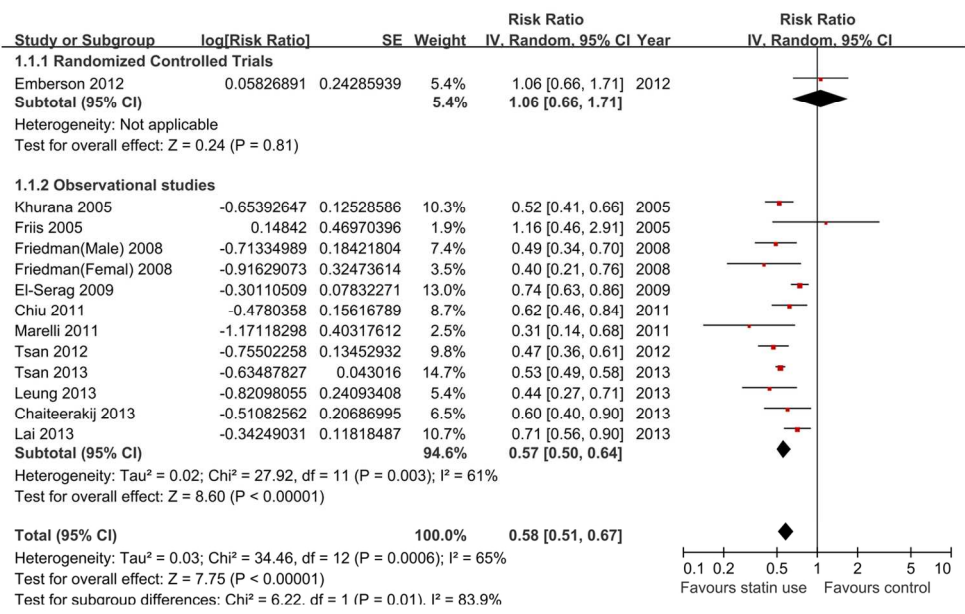

Overall meta-analysis of the statin use and the liver cancer risk.  
128x80mm (300 x 300 DPI)

Review only

1  
2  
3  
4  
5  
6  
7  
8  
9  
10  
11  
12  
13  
14  
15  
16  
17  
18  
19  
20  
21  
22  
23  
24  
25  
26  
27  
28  
29  
30  
31  
32  
33  
34  
35  
36  
37  
38  
39  
40  
41  
42  
43  
44  
45  
46  
47  
48  
49

**SUPPLEMENTARY TABLES:**

**Supplementary Table 1.** Assessment of methodological quality of the cohort and case-control studies according to the Newcastle–Ottawa Scale

| Cohort Studies               | Selection                                |                                     |                           | Outcome of present at start of study | Comparability                |                       | Outcome               |                       | Total Score |
|------------------------------|------------------------------------------|-------------------------------------|---------------------------|--------------------------------------|------------------------------|-----------------------|-----------------------|-----------------------|-------------|
|                              | Representativeness of the exposed cohort | Selection of the non-exposed cohort | Ascertainment of exposure |                                      | Control for important factor | Assessment of outcome | Follow-up long enough | Adequacy of follow up |             |
| Friis, 2005 <sup>28</sup>    | ☆                                        | ☆                                   | ☆                         | ☆                                    | ☆                            | ☆                     | -                     | ☆                     | 7           |
| Friedman, 2008 <sup>29</sup> | ☆                                        | ☆                                   | ☆                         | ☆                                    | ☆                            | ☆                     | -                     | ☆                     | 7           |
| Marelli, 2011 <sup>30</sup>  | ☆                                        | ☆                                   | ☆                         | ☆                                    | ☆                            | ☆                     | ☆                     | ☆                     | 8           |
| Tsan, 2012 <sup>31</sup>     | ☆                                        | ☆                                   | ☆                         | ☆                                    | ☆                            | ☆                     | ☆                     | ☆                     | 8           |
| Tsan, 2013 <sup>32</sup>     | ☆                                        | ☆                                   | ☆                         | ☆                                    | ☆                            | ☆                     | ☆                     | ☆                     | 8           |

  

| Case–Control Studies             | Selection                    |                             |                       | Definition of controls | Comparability                |                           | Exposure                           |                   | Total Score |
|----------------------------------|------------------------------|-----------------------------|-----------------------|------------------------|------------------------------|---------------------------|------------------------------------|-------------------|-------------|
|                                  | Adequate definition of cases | Representativeness of cases | Selection of controls |                        | Control for important factor | Ascertainment of Exposure | Same method for cases and controls | Non-response rate |             |
| Khurana, 2005 <sup>33</sup>      | -                            | ☆                           | ☆                     | ☆                      | ☆                            | ☆                         | ☆                                  | -                 | 6           |
| El-Serag, 2009 <sup>34</sup>     | -                            | ☆                           | ☆                     | ☆                      | ☆☆                           | ☆                         | ☆                                  | -                 | 7           |
| Chiu, 2011 <sup>35</sup>         | -                            | ☆                           | ☆                     | ☆                      | ☆☆                           | ☆                         | ☆                                  | -                 | 7           |
| Lai, 2013 <sup>36</sup>          | -                            | ☆                           | ☆                     | ☆                      | ☆☆                           | ☆                         | ☆                                  | -                 | 7           |
| Leung, 2013 <sup>37</sup>        | ☆                            | ☆                           | ☆                     | ☆                      | ☆                            | ☆                         | ☆                                  | ☆                 | 8           |
| Chaiteerakij, 2013 <sup>38</sup> | -                            | ☆                           | -                     | ☆                      | ☆                            | ☆                         | ☆                                  | -                 | 5           |

Control for important factor: ☆Reported relative risk have been adjusted for at least 4 of 7 important factors: HBV infection, HCV infection, cirrhosis, NAFLD, HCV treatment, HBV treatment, anti-diabetic medications; ☆ Study controls for any additional factor. Assessment of outcome: ☆ record linkage. Follow-up long enough: ☆ follow up period ≥ 4 years. Adequate definition of cases: ☆ The case is defined with independent validation. Non-response rate: ☆ Same rate for both groups.

**Supplementary Table 2.** Studies reporting RR for use of lipophilic or hydrophilic statins, and for higher cumulative dosage of statin use

| Studies                           | Measurements of effect estimates | Statins type         | Dosage/Duration of Statin use | Crude RR with 95% CIs | Adjusted RR with 95% CIs |
|-----------------------------------|----------------------------------|----------------------|-------------------------------|-----------------------|--------------------------|
| Tsan, 2012, Taiwan <sup>31</sup>  | HR                               | A, F, L, P, R, and S | >365 cDDD                     | 0.50 (0.26-0.96)      | 0.34 (0.33-0.59)         |
|                                   | HR                               | Lipophilia statin    | ≥28 cDDD                      | 0.62 (0.47-0.83)      | 0.44 (0.33-0.59)         |
|                                   | HR                               | Hydrophilic statin   | ≥28 cDDD                      | 0.65 (0.39-1.09)      | 0.51 (0.31-0.85)         |
| Tsan, 2013, Taiwan <sup>32</sup>  | HR                               | A, F, L, P, R, and S | >180 cDDD                     | NA                    | 0.33 (0.25-0.42)         |
| El-Serag, 2009, USA <sup>34</sup> | OR                               | Simvastatin          | 1.6 years (M)                 | 0.47 (0.41-0.54)      | 0.64 (0.55-0.75)         |
|                                   | OR                               | A, F, L, P, R, and S | >215.4 cDDD                   | 0.47 (0.30-0.72)      | 0.63 (0.37-1.06)         |
| Chiu, 2011, Taiwan <sup>35</sup>  | OR                               | Lipophilia statin    | ≥ 1 cDDD                      | NA                    | 0.56 (0.45-0.69)*        |
|                                   | OR                               | Hydrophilic statin   | ≥ 1 cDDD                      | NA                    | 0.46 (0.29-0.71)*        |
| Lai, 2013, Taiwan <sup>36</sup>   | OR                               | Lipophilia statin    | ≥1 Rx                         | 0.54 (0.48-0.61)*     | 0.67 (0.57-0.79)*        |
|                                   | OR                               | Hydrophilic statin   | ≥1 Rx                         | 0.63 (0.47-0.83)*     | 0.80 (0.55-1.16)*        |

The RR with an asterisk mark (\*) was calculated based on the raw data in the original study. The others, crude or adjusted, were extracted from the original paper.

1  
2  
3  
4  
5  
6  
7  
8  
9  
10  
11  
12  
13  
14  
15  
16  
17  
18  
19  
20  
21  
22  
23  
24  
25  
26  
27  
28  
29  
30  
31  
32  
33  
34  
35  
36  
37  
38  
39  
40  
41  
42  
43  
44  
45  
46  
47  
48  
49

**Supplementary Table 3.** Published studies of the total cholesterol and the risk of liver cancer

| Studies                             | Study design                                                                                | cases/<br>participants | Follow-up  | Reference<br>(mg/dL) | Index (mg/dL) | Adjusted HR (95% CIs) |                   | P for trend*                   | Confounders for<br>adjustment |
|-------------------------------------|---------------------------------------------------------------------------------------------|------------------------|------------|----------------------|---------------|-----------------------|-------------------|--------------------------------|-------------------------------|
|                                     |                                                                                             |                        |            |                      |               | Men                   | Women             |                                |                               |
| Iso, 2009, Japan <sup>43</sup>      | Population-based cohort<br>(JPHC Study)                                                     | 125 /33,368            | 12.4 years | 180–199              | <160          | 2.62 (1.44–4.76)      | 4.15 (1.70–10.16) | Men < 0.0001<br>Women < 0.0001 | 1-10                          |
|                                     |                                                                                             |                        |            |                      | 160–179       | 1.04 (0.52–2.07)      | 1.99 (0.82–4.85)  |                                |                               |
|                                     |                                                                                             |                        |            |                      | 180–199       | 1                     | 1                 |                                |                               |
|                                     |                                                                                             |                        |            |                      | 200–219       | 0.56 (0.24–1.28)      | 1.09 (0.44–2.68)  |                                |                               |
|                                     |                                                                                             |                        |            |                      | 200–239       | 0.49 (0.16–1.44)      | 0.41 (0.11–1.52)  |                                |                               |
| Ahn, 2009, Finland <sup>42</sup>    | Placebo-controlled,<br>double-blinded primary<br>prevention trial in male<br>smokers (ATBC) | 191/29,093             | 18.0 years | < 203.9              | < 203.9       | 1                     | -                 | P=0.0007                       | 1-5, 11-17                    |
|                                     |                                                                                             |                        |            |                      | 203.9-227.6   | 0.69 (0.46-1.05)      | -                 |                                |                               |
|                                     |                                                                                             |                        |            |                      | 227.7-249.2   | 0.63 (0.41-0.97)      | -                 |                                |                               |
|                                     |                                                                                             |                        |            |                      | 249.3-276.6   | 0.56 (0.36-0.88)      | -                 |                                |                               |
|                                     |                                                                                             |                        |            |                      | > 276.7       | 0.66 (0.43-1.01)      | -                 |                                |                               |
| Kitahara, 2011, Korea <sup>44</sup> | Prospective study of Korean<br>men and women (Korean<br>NHIC)                               | 10,161/1,189,719       | 12.7 years | < 160                | < 160         | 1                     | -                 | Men < 0.001<br>Women < 0.001   | 2-5, 13, 18                   |
|                                     |                                                                                             |                        |            |                      | 160-179       | 0.69 (0.65-74)        | 0.63 (0.54-0.72)  |                                |                               |
|                                     |                                                                                             |                        |            |                      | 180-199       | 0.62 (0.58-0.66)      | 0.50 (0.44-0.58)  |                                |                               |
|                                     |                                                                                             |                        |            |                      | 200-239       | 0.48 (0.45-0.51)      | 0.37(0.32-0.42)   |                                |                               |
|                                     |                                                                                             |                        |            |                      | ≥ 240         | 0.42 (0.38-0.45)      | 0.32 (0.27-0.39)  |                                |                               |

JPHC Study = The Japan Public Health Center-based Prospective Study, ATBC = The Alpha-Tocopherol, Beta-Carotene Cancer Prevention Study, Korean NHIC = The Korean National Health Insurance Corporation Medical Evaluation. \*Tests for linear trend were conducted by treating the total cholesterol as a continuous variable in the multivariable models. Confounders for adjustment: 1 = age, 2 = BMI, 3 = smoking, 4 = ethanol intake, 5 = hypertension, 6 = diabetes, 7 = hyperlipidemia medication use, 8 = total vegetable intake, 9 = coffee intake, 10 = public health center, 11 = intervention, 12 = level of education, 13 = physical activity, 14 = Saturates fat intake, 15 = polyunsaturated fat intake, 16 = total calorie, 17 = serum HDL cholesterol, 18 = fasting serum glucose.



**Supplementary Table 4.** Published trials of statin use as adjuvant in treatment of liver cancer

| Studies                                | Study design                                  | Patients population                                             | Intervention                                   | Control                                         | Overall survival of intervention (months) | Overall survival of control (months)                                | Kaplan-Meier and log-rank test            |
|----------------------------------------|-----------------------------------------------|-----------------------------------------------------------------|------------------------------------------------|-------------------------------------------------|-------------------------------------------|---------------------------------------------------------------------|-------------------------------------------|
| Kawata, 2001, Japan <sup>49</sup>      | Prospective, randomized, open label study     | Patients with advanced liver cancer after TAE procedure, n = 83 | Pravastatin 20-40 mg + 5-FU 200 mg QD, n = 41  | 5-FU 200 mg QD, n = 42                          | Median 18                                 | Median 9                                                            | <i>P</i> = 0.006                          |
| Lersch, 2004, Germany <sup>50</sup>    | Prospective study                             | Patients with advanced liver cancer, n = 58                     | Pravastatin 40-80 mg QD, n = 20                | A: Octreotide, n = 30;<br>B: Gemcitabine, n = 8 | Median 7.2<br>(95% CIs 2.9-11.5)          | A: Median 5(95% CIs 2.2-7.8);<br>B: Median 3.5<br>(95% CIs 2.2-4.9) | A: <i>P</i> = 0.09;<br>B: <i>P</i> = 0.03 |
| Graf, 2008, Germany <sup>51</sup>      | Prospective, non-randomized, open label study | Patients with advanced liver cancer after TACE, n = 183         | Pravastatin 20-40 mg QD, n = 52                | No treatment, n = 131                           | Median 20.9<br>(95% CIs 15.5-26.3)        | Median 20.9<br>(95% CIs 15.5-26.3)                                  | <i>P</i> = 0.003                          |
| Georgescu, 2011, Romania <sup>52</sup> | Prospective, randomized, open label study     | Patients with advanced liver cancer, n = 72                     | Lovastatin 40 mg + Sorafenib 400 mg QD, n = 39 | Sorafenib 400 mg QD, n = 33                     | Mean 12.15±0.76                           | Mean 10.85±0.82                                                     | Non-significant                           |

TAE = Transcatheter Arterial Embolization; TACE = Transhepatic Arterial Chemotherapy and Embolization).

**Supplementary Table 5.** Ongoing clinical trials of statin use as adjuvant in treatment of liver cancer

| Studies          | Year | Location | Phase | Study design                                                                 | Condition                                | Intervention                                                                                       | Control                           | Estimated Enrollment | Resist number                       | Status     |
|------------------|------|----------|-------|------------------------------------------------------------------------------|------------------------------------------|----------------------------------------------------------------------------------------------------|-----------------------------------|----------------------|-------------------------------------|------------|
| ESTAHEP-2010     | 2011 | Spain    | II    | Multicenter, prospective, randomized, double-blind, placebo-controlled study | Advanced liver cancer                    | Sorafenib 400 mg BID + Pravastatin 40 mg, QD                                                       | Sorafenib 400 mg BID + placebo QD | 216                  | NCT01418729; EUCTR2010-024421-21-ES | Recruiting |
| PRODIGE 21       | 2011 | France   | II    | Multicenter, prospective, randomized, open label study                       | Liver cancer with Child-Pugh B Cirrhosis | A: Sorafenib 400 mg BID; B: Pravastatin 40 mg, QD; C: Sorafenib 400 mg BID + Pravastatin 40 mg, QD | Best supportive care              | 160                  | NCT01357486                         | Recruiting |
| JOUVE PHRCK 2009 | 2013 | France   | III   | prospective, randomized, open label study                                    | Liver cancer with Child-Pugh A Cirrhosis | Sorafenib 800 mg BID + Pravastatin 40 mg, QD                                                       | Sorafenib 800 mg BID              | 474                  | NCT01903694; NCT01075555            | Recruiting |

SUPPLEMENTARY FIGURES:

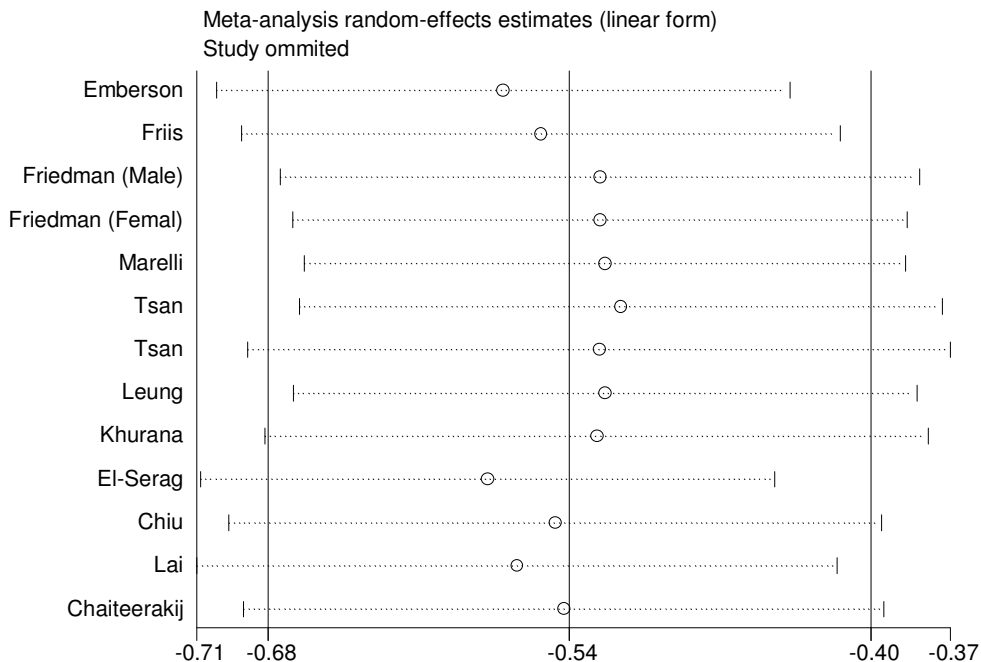

Supplementary Figure 1. Influence analysis.

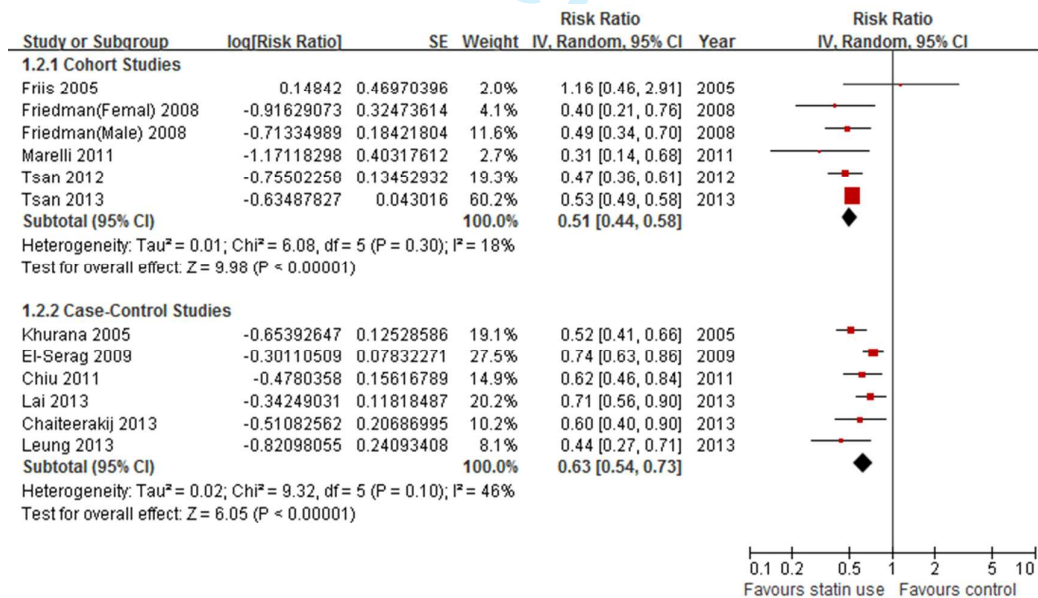

Supplementary Figure 2. Subgroup analyses based on study design.

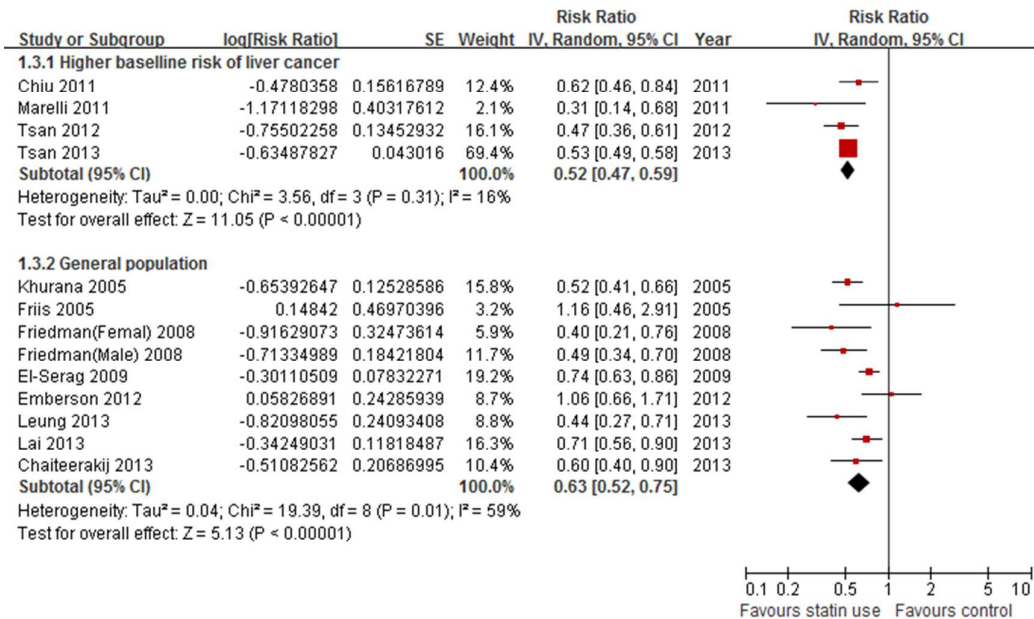

Supplementary Figure 3. Subgroup analyses based on baseline risk of liver cancer.

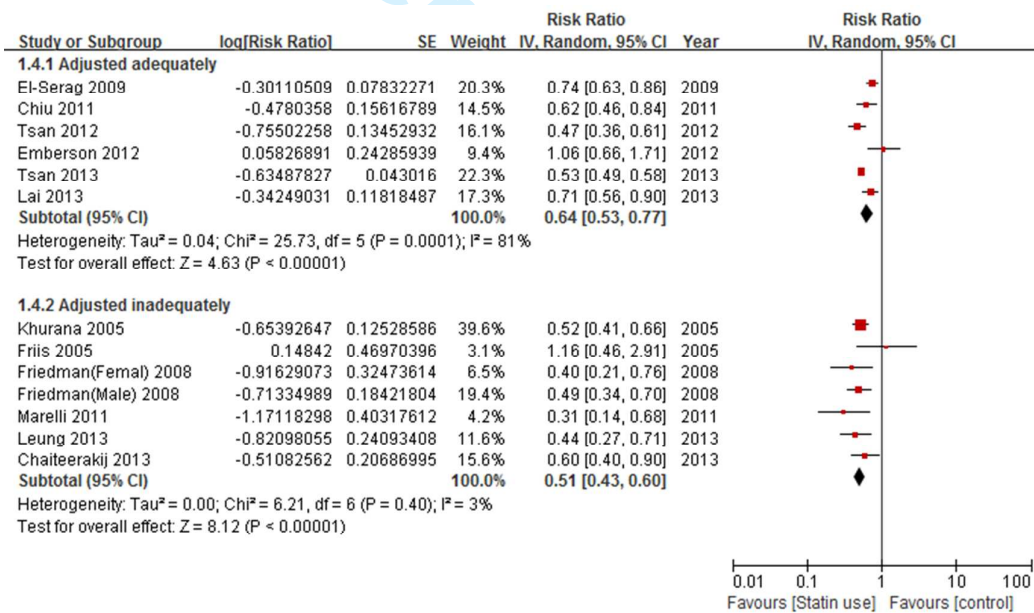

Supplementary Figure 4. Subgroup analyses based on confounder adjustment.

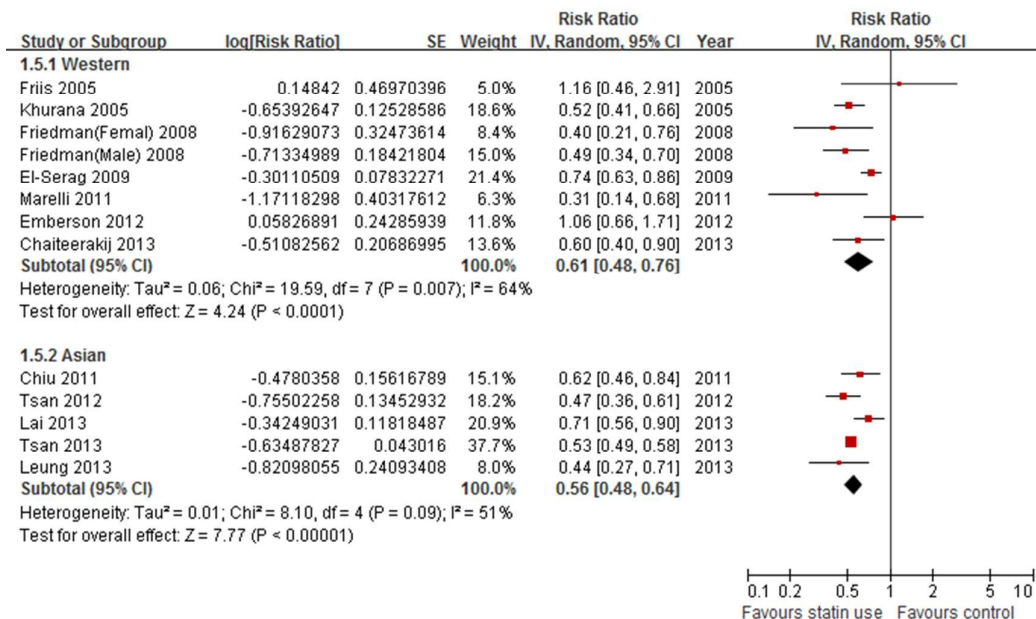

Supplementary Figure 5. Subgroup analyses based on study location.

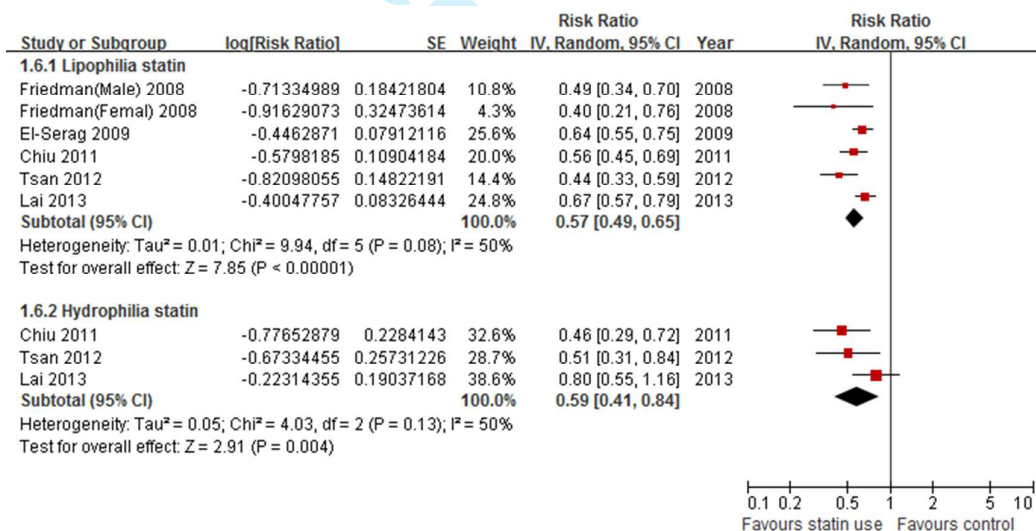

Supplementary Figure 6. Subgroup analyses based on pharmacokinetic of statins.

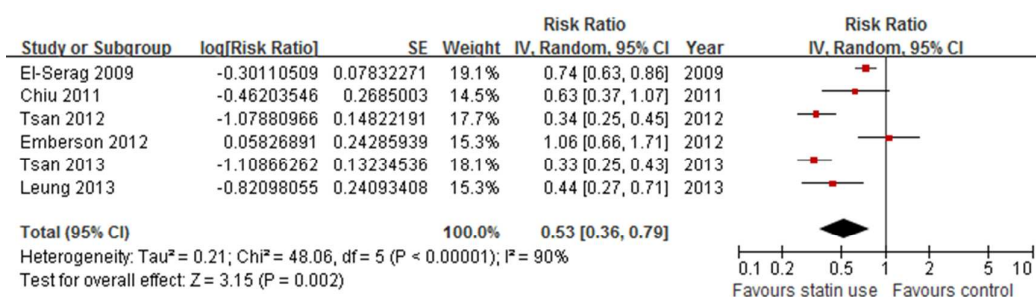

Supplementary Figure 7. Subgroup analysis of higher cumulative dose of statin use.

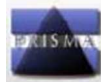

# PRISMA 2009 Checklist

1  
2  
3  
4  
5  
6  
7  
8  
9  
10  
11  
12  
13  
14  
15  
16  
17  
18  
19  
20  
21  
22  
23  
24  
25  
26  
27  
28  
29  
30  
31  
32  
33  
34  
35  
36  
37  
38  
39  
40  
41  
42  
43  
44  
45  
46  
47  
48  
49

| Section/topic                      | #  | Checklist item                                                                                                                                                                                                                                                                                              | Reported on page # |
|------------------------------------|----|-------------------------------------------------------------------------------------------------------------------------------------------------------------------------------------------------------------------------------------------------------------------------------------------------------------|--------------------|
| <b>TITLE</b>                       |    |                                                                                                                                                                                                                                                                                                             |                    |
| Title                              | 1  | Identify the report as a systematic review, meta-analysis, or both.                                                                                                                                                                                                                                         | 1                  |
| <b>ABSTRACT</b>                    |    |                                                                                                                                                                                                                                                                                                             |                    |
| Structured summary                 | 2  | Provide a structured summary including, as applicable: background; objectives; data sources; study eligibility criteria, participants, and interventions; study appraisal and synthesis methods; results; limitations; conclusions and implications of key findings; systematic review registration number. | 2                  |
| <b>INTRODUCTION</b>                |    |                                                                                                                                                                                                                                                                                                             |                    |
| Rationale                          | 3  | Describe the rationale for the review in the context of what is already known.                                                                                                                                                                                                                              | 4                  |
| Objectives                         | 4  | Provide an explicit statement of questions being addressed with reference to participants, interventions, comparisons, outcomes, and study design (PICOS).                                                                                                                                                  | 5                  |
| <b>METHODS</b>                     |    |                                                                                                                                                                                                                                                                                                             |                    |
| Protocol and registration          | 5  | Indicate if a review protocol exists, if and where it can be accessed (e.g., Web address), and, if available, provide registration information including registration number.                                                                                                                               | no                 |
| Eligibility criteria               | 6  | Specify study characteristics (e.g., PICOS, length of follow-up) and report characteristics (e.g., years considered, language, publication status) used as criteria for eligibility, giving rationale.                                                                                                      | 6                  |
| Information sources                | 7  | Describe all information sources (e.g., databases with dates of coverage, contact with study authors to identify additional studies) in the search and date last searched.                                                                                                                                  | 5                  |
| Search                             | 8  | Present full electronic search strategy for at least one database, including any limits used, such that it could be repeated.                                                                                                                                                                               | 5                  |
| Study selection                    | 9  | State the process for selecting studies (i.e., screening, eligibility, included in systematic review, and, if applicable, included in the meta-analysis).                                                                                                                                                   | 6                  |
| Data collection process            | 10 | Describe method of data extraction from reports (e.g., piloted forms, independently, in duplicate) and any processes for obtaining and confirming data from investigators.                                                                                                                                  | 6-7                |
| Data items                         | 11 | List and define all variables for which data were sought (e.g., PICOS, funding sources) and any assumptions and simplifications made.                                                                                                                                                                       | 6-7                |
| Risk of bias in individual studies | 12 | Describe methods used for assessing risk of bias of individual studies (including specification of whether this was done at the study or outcome level), and how this information is to be used in any data synthesis.                                                                                      | 7                  |
| Summary measures                   | 13 | State the principal summary measures (e.g., risk ratio, difference in means).                                                                                                                                                                                                                               | 7                  |
| Synthesis of results               | 14 | Describe the methods of handling data and combining results of studies, if done, including measures of consistency (e.g., $I^2$ for each meta-analysis).                                                                                                                                                    | 7                  |



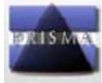

# PRISMA 2009 Checklist

Page 1 of 2

| Section/topic                 | #  | Checklist item                                                                                                                                                                                           | Reported on page # |
|-------------------------------|----|----------------------------------------------------------------------------------------------------------------------------------------------------------------------------------------------------------|--------------------|
| Risk of bias across studies   | 15 | Specify any assessment of risk of bias that may affect the cumulative evidence (e.g., publication bias, selective reporting within studies).                                                             | 8                  |
| Additional analyses           | 16 | Describe methods of additional analyses (e.g., sensitivity or subgroup analyses, meta-regression), if done, indicating which were pre-specified.                                                         | 8                  |
| <b>RESULTS</b>                |    |                                                                                                                                                                                                          |                    |
| Study selection               | 17 | Give numbers of studies screened, assessed for eligibility, and included in the review, with reasons for exclusions at each stage, ideally with a flow diagram.                                          | 8                  |
| Study characteristics         | 18 | For each study, present characteristics for which data were extracted (e.g., study size, PICOS, follow-up period) and provide the citations.                                                             | 9 Table1,2         |
| Risk of bias within studies   | 19 | Present data on risk of bias of each study and, if available, any outcome level assessment (see item 12).                                                                                                | 10, Suppl. Table 1 |
| Results of individual studies | 20 | For all outcomes considered (benefits or harms), present, for each study: (a) simple summary data for each intervention group (b) effect estimates and confidence intervals, ideally with a forest plot. | Figure 2           |
| Synthesis of results          | 21 | Present results of each meta-analysis done, including confidence intervals and measures of consistency.                                                                                                  | 10                 |
| Risk of bias across studies   | 22 | Present results of any assessment of risk of bias across studies (see Item 15).                                                                                                                          | 10                 |
| Additional analysis           | 23 | Give results of additional analyses, if done (e.g., sensitivity or subgroup analyses, meta-regression [see Item 16]).                                                                                    | 10-12              |
| <b>DISCUSSION</b>             |    |                                                                                                                                                                                                          |                    |
| Summary of evidence           | 24 | Summarize the main findings including the strength of evidence for each main outcome; consider their relevance to key groups (e.g., healthcare providers, users, and policy makers).                     | 12-13              |
| Limitations                   | 25 | Discuss limitations at study and outcome level (e.g., risk of bias), and at review-level (e.g., incomplete retrieval of identified research, reporting bias).                                            | 13-14              |
| Conclusions                   | 26 | Provide a general interpretation of the results in the context of other evidence, and implications for future research.                                                                                  | 15-16              |
| <b>FUNDING</b>                |    |                                                                                                                                                                                                          |                    |
| Funding                       | 27 | Describe sources of funding for the systematic review and other support (e.g., supply of data); role of funders for the systematic review.                                                               | NA                 |

From: Moher D, Liberati A, Tetzlaff J, Altman DG, The PRISMA Group (2009). Preferred Reporting Items for Systematic Reviews and Meta-Analyses: The PRISMA Statement. PLoS Med 6(6): e1000097. doi:10.1371/journal.pmed1000097

For more information, visit: [www.prisma-statement.org](http://www.prisma-statement.org).

For peer review only - <http://bmjopen.bmj.com/site/about/guidelines.xhtml>

# BMJ Open

## Statin use and risk of liver cancer: an update meta-analysis

|                                 |                                                                                                                                                                                                                                                                                                                                                                                                                                                                                   |
|---------------------------------|-----------------------------------------------------------------------------------------------------------------------------------------------------------------------------------------------------------------------------------------------------------------------------------------------------------------------------------------------------------------------------------------------------------------------------------------------------------------------------------|
| Journal:                        | <i>BMJ Open</i>                                                                                                                                                                                                                                                                                                                                                                                                                                                                   |
| Manuscript ID:                  | bmjopen-2014-005399.R2                                                                                                                                                                                                                                                                                                                                                                                                                                                            |
| Article Type:                   | Research                                                                                                                                                                                                                                                                                                                                                                                                                                                                          |
| Date Submitted by the Author:   | 08-Aug-2014                                                                                                                                                                                                                                                                                                                                                                                                                                                                       |
| Complete List of Authors:       | Shi, Meng; Nanfang Hospital, Southern Medical University, Department of Gastroenterology<br>Zheng, Huiling; Nanfang Hospital, Southern Medical University, Department of Gastroenterology<br>Nie, Biao; Nanfang Hospital, Southern Medical University, Department of Gastroenterology<br>Gong, Wei; Nanfang Hospital, Southern Medical University, Department of Gastroenterology<br>Cui, Xiaobing; Nanfang Hospital, Southern Medical University, Department of Gastroenterology |
| <b>Primary Subject Heading</b>: | Epidemiology                                                                                                                                                                                                                                                                                                                                                                                                                                                                      |
| Secondary Subject Heading:      | Epidemiology, Gastroenterology and hepatology, Oncology                                                                                                                                                                                                                                                                                                                                                                                                                           |
| Keywords:                       | Gastrointestinal tumours < GASTROENTEROLOGY, Epidemiology < ONCOLOGY, Hepatobiliary tumours < ONCOLOGY                                                                                                                                                                                                                                                                                                                                                                            |
|                                 |                                                                                                                                                                                                                                                                                                                                                                                                                                                                                   |

SCHOLARONE™  
Manuscripts

only



## Statin use and risk of liver cancer: an update meta-analysis

Meng Shi<sup>1</sup>, Huiling Zheng<sup>1</sup>, Biao Nie<sup>1</sup>, Wei Gong<sup>1\*</sup> and Xiaobing Cui<sup>1\*</sup>

<sup>1</sup>Guangdong Provincial Key Laboratory of Gastroenterology, Department of Gastroenterology, Nanfang Hospital, Southern Medical University, No. 1838 Guangzhou Avenue North, Guangzhou 510515, China

\*Correspondence to Dr. Xiaobing Cui, Email: [xbing119@gmail.com](mailto:xbing119@gmail.com); and Dr. Wei Gong, Email: [drgwei@foxmail.com](mailto:drgwei@foxmail.com).

**Running title:** Meta-analysis: statin and liver cancer

**Key words:** *Statin; Liver cancer; Cancer Prevention; Meta-analysis.*

## Abstract

**Objective:** Statins are commonly prescribed cholesterol-lowering drugs. Preclinical studies suggest that statins may possess cancer preventive properties. The primary objective of this meta-analysis was to determine the association between the statin use and the risk of liver cancer.

**Design:** Meta-analysis.

**Setting:** International.

**Participants:** A comprehensive literature search of PubMed, BIOSIS Previews, Web of Science, EMBASE, EBSCO and Cochrane Library was conducted through March 2014. The effect estimate was reported as pooled relative risk (RR) with 95% confidence intervals (CIs), using the random-effects model.

**Results:** A total of 12 studies (one individual patient data analysis of 22 randomized controlled trials, 5 cohorts, and 6 case-controls) were qualified for this meta-analysis, involving 5,640,313 participants including 35,756 liver cancer cases. Our results indicated a significant risk reduction of liver cancer among all statin users (RR 0.58, 95% CIs 0.51–0.67). The difference of the study designs can partly explained the significant heterogeneity found in the overall analysis ( $I^2 = 65\%$ ,  $P = 0.0006$ ). No evidence of publication bias was observed in this meta-analysis. Similar risk reductions were found in the subgroups analysis of Western and Asian countries, lipophilic and hydrophilia statins. There was a trend toward more risk reductions in subgroups with higher baseline risk, inadequate adjustment, and higher cumulative dosage of statin use.

1  
2  
3  
4 **Conclusions:** This meta-analysis suggests that the statin is associated with a  
5  
6 significant risk reduction of liver cancer, when taken daily for cardiovascular event  
7  
8 prevention. However, this preventive effect might be overestimated due to the  
9  
10 exposure period, the indication and contraindication of statins, and other confounders.  
11  
12  
13  
14 Statins might be considered as an adjuvant in the treatment of liver cancer.  
15  
16  
17  
18

### 19 **Strengths and limitations of this study**

20  
21 Statins are commonly prescribed as cholesterol-lowering drugs. In this comprehensive  
22  
23 meta-analysis, we demonstrate that the statin use is associated with a significant risk  
24  
25 reduction of liver cancer.  
26  
27

28  
29 The difference of the study designs is the part reason that explained the significant  
30  
31 heterogeneity found in the overall analysis.  
32

33  
34 However, this preventive effect might be overestimated due to the exposure period,  
35  
36 the indication and contraindication of statins, and other confounders.  
37

38  
39 Statins might be considered as an adjuvant in the treatment of liver cancer.  
40  
41  
42  
43  
44  
45  
46  
47  
48  
49  
50  
51  
52  
53  
54  
55  
56  
57  
58  
59  
60

## Introduction

Statins are inhibitors of 3-hydroxy-3-methylglutaryl coenzyme-A (HMG-CoA) reductase and they are widely used to reduce the plasma cholesterol level and the risk of cardiovascular events.<sup>1</sup> Although there is a concern over their possible carcinogenicity raised in rodent studies,<sup>2</sup> preclinical studies indicate that statins have anticancer properties *in vitro* and *in vivo*, through inhibiting angiogenesis, inducing apoptosis, and suppressing tumor growth and metastasis.<sup>3-5</sup>

However, higher concentrations of statins are typically required to induce these effects, raising questions concerning the therapeutic relevance of statins on cancer.<sup>6</sup>

To date, clinical studies regarding the cancer incidence associated with statin administration have highlighted conflicting results. Moreover, a large number of meta-analyses have concluded that there was no association between statin use and risk of overall cancer,<sup>7-10</sup> or cancer of breast<sup>11</sup>, stomach,<sup>12</sup> or pancreas.<sup>13</sup> There is only a modest protective effect of statins in prostate cancer<sup>14</sup> and colorectal cancer.<sup>15</sup>

In contrary, recent studies reported encouraging results for risk reduction of liver cancer among all statin users. Previous meta-analysis, conducted by Singh *et al.* by including 10 studies, found that statin users were less likely to develop hepatocellular carcinoma (HCC) than statin non-users.<sup>16</sup> However, Singh *et al.* included the ALERT, LIPS, and MEGA trials twice, by including three individual patient data (IPD) analysis of randomized controlled trials (RCTs).<sup>17-19</sup> Meanwhile, some factors of stratification were not considered in their analyses, such as dose and timing of exposure to statins, and the selection of controls and confounders, which might limit

1  
2  
3 the evaluation of cancer risk.<sup>20</sup> Furthermore, the lipophilic statins are accompanied by  
4  
5 an extensive first-pass effect at the hepatic level.<sup>21</sup> It is plausible that lipophilic statins  
6  
7 may have a better liver cancer preventive qualities than the hydrophilic ones.<sup>22</sup>  
8  
9

10  
11 Therefore, we performed this updated meta-analysis to assess the association between  
12  
13 the statin use and the risk of liver cancer, involving the recently published studies and  
14  
15 conducting more subgroup analyses based on the factors mentioned above. Our results  
16  
17 demonstrated that statin use was associated with an over 40% risk reduction in liver  
18  
19 cancer, which may have a significant translational potential in the clinical practice.  
20  
21  
22 However, there were some confounders might overestimate this preventive effect of  
23  
24 statins.  
25  
26  
27

## 28 **MATERIALS AND METHODS**

### 29 *Literature Search strategy*

30  
31 This meta-analysis was conducted following the PRISMA guidelines.<sup>23</sup>  
32  
33

34  
35 The systematic computerized search for eligible studies were performed on the  
36  
37 database of PubMed, BIOSIS Previews, Web of Science, EMBASE, EBSCO, and  
38  
39 Cochrane Library, covering all studies published from their inception to March 5,  
40  
41 2014. The following terms were searched with both the subjects (MeSH terms) and  
42  
43 text-word search strategies: “(Statin OR HMG-CoA reductase inhibitors OR  
44  
45 Atorvastatin OR Cerivastatin OR Fluvastatin OR Lovastatin OR Pravastatin OR  
46  
47 Rosuvastatin OR Simvastatin) AND (Hepatocellular OR Hepatic OR Intrahepatic OR  
48  
49 Interlobular OR Liver) AND (Carcinoma OR Sarcomas OR Angiosarcoma OR Cancer  
50  
51 OR Neoplasm). Additionally, the relevant reviews and retrieved articles were searched  
52  
53  
54  
55  
56  
57  
58  
59  
60

1  
2  
3 manually for more eligible studies.  
4

5  
6 In study searching, only the original researches, published in form of peer review  
7  
8 article or meeting abstract, were included. No language restrictions were imposed.  
9  
10  
11 However, the studies we included were all published in English.  
12

### 13 ***Study selection***

14  
15 The inclusion criteria were: (1) randomized controlled trial (RCTs), cohort studies or  
16  
17 case-control studies; (2) original studies that assessed the effect of statin use on the  
18  
19 risk of liver cancer, compared with placebo or no treatment; (3) liver cancer cases  
20  
21 were identified according to the International Classification of Diseases codes (ICD);  
22  
23 and (4) studies with estimate of relative risk (risk ratio, RR) of liver cancer, or with  
24  
25 data sufficient to calculate it.  
26  
27  
28  
29

30  
31 The exclusion criteria were: (1) study design not meeting the inclusion criteria; (2)  
32  
33 studies without estimate of RR, or without sufficient data to calculate it; or (3) studies  
34  
35 with duplicated or overlap reports.  
36  
37  
38

### 39 ***Data extraction***

40  
41 Two independent investigators (M. Shi and X.B. Cui) extracted data from the eligible  
42  
43 studies using a predefined data collection form. The differences of data extraction  
44  
45 were resolved by consensus referring back to the original article. The extracted  
46  
47 information included: (1) Studies: first author, year of publication, study design,  
48  
49 location, patient populations, period, and follow-up; (2) Statins: type, dosage or  
50  
51 duration of statin use; (3) liver cancer: case identification, number of liver cancer,  
52  
53 crude RR with 95% confidence intervals (CIs), adjusted RR reflecting the greatest  
54  
55  
56  
57  
58  
59  
60

1  
2  
3 degree of control for confounders, and confounders for adjustment (including  
4 variables for matching). When the RR were not available, the RR with 95% CIs were  
5  
6  
7  
8  
9 calculated from the raw data in original studies.

10  
11 We extracted different measurements of effect estimates from original studies, such as  
12  
13 Relative Risk (RR), Odds Ratio (OR), Hazard Ratio (HR), and Observed/Expected  
14  
15 ratio. Due to the fact that the incidence of liver cancer was low in all studies, these  
16  
17 different measurements can be used to provide similar estimates of RR.  
18  
19

### 20 21 ***Methodological quality assessment***

22  
23 Of note, the included RCT was pooled analysis of other RCTs, therefore, it is  
24  
25 inappropriate to assess the methodological quality. The methodological quality of  
26  
27 cohort and case-control studies were assessed on the Newcastle-Ottawa Scale,<sup>24</sup>  
28  
29 including eight items that were categorized three categories: selection (four items, one  
30  
31 star each), comparability (one item, up to two stars), and exposure/outcome (three  
32  
33 items, one star each). A “star” presents a “high” quality choice of each item.  
34  
35  
36  
37  
38

### 39 ***Statistical analysis***

40  
41 The overall meta-analysis was first performed, followed by the subgroup analyses,  
42  
43 based on study design, baseline risk of liver cancer, confounding adjustment, study  
44  
45 location, and pharmacokinetic. Meanwhile, we conducted subgroup analyses based on  
46  
47 studies which reported RR estimate for higher cumulative dosage of statin use, when  
48  
49 appropriate data were available.  
50  
51  
52

53  
54 To take into account the heterogeneity and provide a more conservative estimate, the  
55  
56 inverse variance method was used to estimate the pooled RR and corresponding 95%  
57  
58  
59  
60

1  
2  
3  
4 CIs, and data were pooled using a random effects model. Heterogeneity was assessed  
5  
6 using the Chi-squared statistic ( $P$ ) together with the Higgins I-squared statistic ( $I^2$ ), a  
7  
8  $P$  value  $<0.10$  was considered statistically significant for heterogeneity; and an  $I^2$   
9  
10 value  $> 50\%$  was considered a measure of severe heterogeneity.<sup>25</sup>

11  
12  
13  
14 Publication bias was assessed using the Begg's test and the Egger's test.<sup>26</sup> Influence  
15  
16 analysis was performed to investigate the influence of a single study on the overall  
17  
18 meta-analysis estimate, by omitting one study in each turn. Test for interaction was  
19  
20 applied to identify the difference between pooled RR from subgroup analysis using  
21  
22 the method described by Altman and Bland.<sup>27</sup> All statistical tests were two-sided and  
23  
24  $P < 0.05$  was considered statistically significant, unless otherwise specified. Software  
25  
26 Review Manager (RevMan5.2, Copenhagen) and STATA (Stata 11.2, Texas) were  
27  
28 used for the statistical analysis.  
29  
30  
31  
32

## 33 34 **Results**

### 35 36 **Study selection**

37  
38 **Figure 1** illustrated the process of study selection for the meta-analysis. Of the 1424  
39  
40 potentially relevant references identified by electric and manual search, 142 were  
41  
42 selected for full-text review after screening titles and abstracts. Finally, a total of 12  
43  
44 studies were included, with one IPD analysis,<sup>19</sup> five cohort studies,<sup>28-32</sup> and six  
45  
46 case-control studies.<sup>33-38</sup> One case-control study was presented solely in abstract  
47  
48 form.<sup>33</sup>  
49  
50  
51  
52

53  
54 Of note, the cohort study conducted by Friedman *et al.* reported RR estimate  
55  
56 separately for different gender (male and female),<sup>29</sup> we considered these two reports  
57  
58  
59  
60



1  
2  
3  
4 as separate studies. Therefore, a total of thirteen reports were included for the present  
5  
6 meta-analysis.  
7

### 8 *Study characteristics*

9  
10 **Table 1** summarized the characteristics of qualified studies in this meta-analysis. The  
11  
12 12 studies, involving 5,640,313 participants with 35,756 liver cancer cases, were  
13  
14 published between 2005 and 2013. The “RCT” in the present study was pooled  
15  
16 analysis of 22 clinical trials,<sup>19</sup> which investigated statins therapy in cardiovascular  
17  
18 event prevention and reported the occurrence of liver cancer as adverse event. The  
19  
20 observational studies were conducted with the local or national health databases, the  
21  
22 statin exposure were identified by linkage to prescription databases, and the controls  
23  
24 were matched mainly by age, sex and index date. Except one cohort adopted ICD-10  
25  
26 C22,<sup>28</sup> all other studies identified liver cancer cases according to the ICD-9 155. Of  
27  
28 note, two cohorts were restricted to patients with HBV infection,<sup>31</sup> and HCV  
29  
30 infection;<sup>32</sup> one case-control only included patients with diabetes mellitus;<sup>34</sup> two  
31  
32 observational studies included patients aged at least 45 years.<sup>30 35</sup>  
33  
34  
35  
36  
37  
38  
39  
40

41 **Table 2** summarized the data of the included studies. In the RCT<sup>19</sup> and one cohort  
42  
43 study,<sup>30</sup> the RR with 95% CIs were calculated from the 2x2 tables defined by the  
44  
45 incidence of liver cancer and the statin use status. The observational studies reported  
46  
47 different measurements of RR estimates with adjustment by confounders. Several  
48  
49 observational studies adopted the important risk factors of liver cancer for  
50  
51 adjustments<sup>31 32 34-36</sup>, such as HBV infection, HCV infection, cirrhosis, alcoholic liver  
52  
53 disease, or non-alcoholic fatty liver disease (NAFLD).<sup>39</sup> Of note, only two studies  
54  
55  
56  
57  
58  
59  
60

1  
2  
3 adjusted for the cholesterol level,<sup>30 38</sup> and no study adjusted for the metabolic  
4  
5  
6 syndrome, which might also influence the risk of liver cancer.<sup>39</sup>  
7

### 8 9 *Methodological quality*

10  
11 For the cohort and case-control studies, the median score was 7 on the  
12  
13 Newcastle-Ottawa Scale, with a range of 5 to 8 (**Supplementary Table 1**). These  
14  
15 results indicated that the observational studies were in a reasonable good quality.  
16  
17

### 18 19 *Overall meta-analysis*

20  
21 **Figure 2** depicted the forest plot of RR estimate with 95% CIs from individual studies  
22  
23 and overall meta-analysis. In the overall meta-analysis, pooled results showed a  
24  
25 statistically significant decrease in the liver cancer risk among all statin users (RR  
26  
27 0.58, 95% CIs 0.51–0.67). Of note, a statistically significant heterogeneity was  
28  
29 observed ( $I^2 = 65%$ ,  $P = 0.0006$ ). The  $P$ -values of Begg's test and Egger's test were  
30  
31 0.669 and 0.749, respectively, both suggesting there was no evidence of publication  
32  
33 bias. In the influence analysis, the omission of any individual studies did not alter the  
34  
35 direction and magnitude of the observed effect (**Supplementary Figure 1**).  
36  
37  
38  
39

### 40 41 *Subgroup analyses and Test for interaction*

42  
43 We first performed preplanned subgroup analyses based on study design, baseline risk  
44  
45 of liver cancer, confounding adjustment, and study location (**Table 3**).  
46  
47

48  
49 The RCT showed there is no significant association between statin use and risk of  
50  
51 liver cancer (RR 1.06, 0.66–1.71). But the observational studies indicated a significant  
52  
53 decrease of liver cancer risk among all statin users (RR 0.57, 0.50–0.64;  $I^2 = 61%$ ,  $P =$   
54  
55 0.003) (**Figure 2**). Furthermore, we found a greater risk reduction in the subgroup  
56  
57  
58  
59  
60

1  
2  
3  
4 analysis of cohort studies (RR 0.51, 0.44–0.58;  $I^2 = 18\%$ ,  $P = 0.30$ ) than in the  
5  
6 case-control studies (RR 0.63, 0.54–0.73;  $I^2 = 46\%$ ,  $P = 0.10$ ) (**Supplementary**  
7  
8 **Figure 2**).

9  
10  
11 Test for interaction showed significant results between subgroups of the RCT and  
12  
13 observational studies ( $P_{\text{interaction}} = 0.01$ ,  $Z = 2.47$ ), and between subgroups of the  
14  
15 cohort and case-control studies ( $P_{\text{interaction}} = 0.04$ ,  $Z = -2.03$ ). These results indicated  
16  
17 that the difference of the study designs was the part reason that why there was severe  
18  
19 heterogeneity in the overall analysis (**Table 3**).

20  
21  
22 In the subgroup analysis of the four studies with higher baseline risk of liver  
23  
24 cancer,<sup>30-32 35</sup> defined as patients with older age, HBV or HCV infection, there was a  
25  
26 trend toward more decrease of liver cancer risk (RR 0.52, 0.47-0.59;  $I^2 = 16\%$ ,  $P =$   
27  
28 0.31) than in the other eight studies with general population<sup>19 28 29 33 34 36-38</sup> (RR 0.63,  
29  
30 0.52–0.75;  $I^2 = 59\%$ ,  $P = 0.01$ ) (**Supplementary Figure 3**).

31  
32  
33 We defined the RCT or studies adjusted for at least 4 of 7 important confounders,  
34  
35 such as HBV infection, HCV infection, cirrhosis, alcoholic liver disease, NAFLD,  
36  
37 HBV treatment, or HCV treatment,<sup>39</sup> were adjusted adequately. Subgroup analysis of  
38  
39 these six studies<sup>19 31 32 34-36</sup> found a trend toward less decrease of liver cancer risk (RR  
40  
41 0.64, 0.53-0.77;  $I^2 = 81\%$   $P = 0.0001$ ) than the other six studies<sup>28-30 33 37 38</sup> (RR, 0.51,  
42  
43 0.43-0.60;  $I^2 = 3\%$ ,  $P = 0.40$ ) (**Supplementary Figure 4**).

44  
45  
46 Subgroup analyses based on study location found a similar risk reduction of liver  
47  
48 cancer in the Western countries (RR 0.61, 0.48–0.76;  $I^2 = 64\%$ ,  $P = 0.007$ ) and in the  
49  
50 Asian countries (RR 0.56, 0.48–0.64;  $I^2 = 51\%$ ,  $P = 0.09$ ). (**Supplementary Figure 5**)  
51  
52  
53  
54  
55  
56  
57  
58  
59  
60

1  
2  
3  
4 Besides the overall RR estimates, some studies reported different RR estimate for  
5  
6 different pharmacokinetic and dosage of statin use (**Supplementary Table 2**). We  
7  
8 conducted further subgroup analyses based on these available data.  
9

10  
11 According to the different pharmacokinetic, statins can be classified as lipophilic  
12  
13 statins (Atorvastatin, Fluvastatin, Lovastatin, and Simvastatin) and hydrophilia statins  
14  
15 (Pravastatin and Rosuvastatin).<sup>21</sup> Subgroup analysis of lipophilic statins<sup>29 31 34-36</sup>  
16  
17 found a significant decrease of liver cancer risk (RR 0.57, 0.50–0.65;  $I^2 = 50%$ ,  $P =$   
18  
19 0.08). And there was a similar result among users of hydrophilia statins<sup>31 35 36</sup> (RR  
20  
21 0.59, 0.41–0.84;  $I^2 = 50%$ ,  $P = 0.13$ ) (**Supplementary Figure 6**).  
22  
23

24  
25 Test for interaction showed non-significant results for subgroups with different  
26  
27 baseline risk, confounding adjustment, study location, or pharmacokinetic ( $P_{\text{interaction}} =$   
28  
29 0.08, 0.08, 0.54 and 0.86, respectively) (**Table 3**). Therefore, there is no strong  
30  
31 evidence to support a different preventive effect of statins on liver cancer in these  
32  
33 subgroups.  
34  
35

36  
37 Subgroup analysis of six studies with higher cumulative dose of statin use, defined as  
38  
39 statin use more than 180 cumulative defined daily dose (cDDD) or 0.5 years  
40  
41 (cumulative duration), showed a trend toward more risk reduction of liver cancer (RR  
42  
43 0.53, 0.36-0.79), but with a high degree of heterogeneity ( $I^2 = 90%$ ,  $P < 0.00001$ )  
44  
45 (**Supplementary Figure 7**).  
46  
47  
48  
49

## 50 51 Discussion

52  
53 This present meta-analysis represents the most comprehensive review to date on the  
54  
55 association between the statin use and the liver cancer risk, by including 12 studies  
56  
57  
58  
59  
60

1  
2  
3  
4 (one IPD analysis of 22 RCTs, 5 cohort studies, and 6 case-control studies) and  
5  
6 involving 5,640,313 participants with 35,756 liver cancer cases. Overall, we found  
7  
8 that statin use was associated with an over 40% risk reduction in liver cancer  
9  
10 compared with nonusers (RR 0.58, 95%CI 0.51–0.67). This result was in line with the  
11  
12 previous three meta-analyses: Singh *et al.* included 10 studies and suggested statin  
13  
14 users were less likely to develop HCC (OR 0.63, 95%CI 0.52–0.76),<sup>16</sup> Pradelli *et al.*  
15  
16 and Zhang *et al.* included 5 and 7 observational studies and found a summary RR of  
17  
18 0.58 (95%CI 0.46–0.74) and 0.61 (95%CI 0.49–0.76), respectively.<sup>40 41</sup>

19  
20  
21  
22  
23  
24 The IPD analysis of 22 RCTs showed there is no significant association between statin  
25  
26 use and risk of liver cancer. The significant risk reduction of liver cancer among all  
27  
28 statin users was seen primarily in the observational studies, and this preventive effect  
29  
30 was relatively convinced in the cohorts than in the case-controls. There were some  
31  
32 reasons to explain the different findings between RCTs and observational studies.  
33  
34

35  
36 First, the exposure period to statins might be shorter than the period to carcinogenesis  
37  
38 and the latency to diagnosis in the cohorts and the case-controls. The observational  
39  
40 studies defined statin use varying in dosage and duration, from patients who received  
41  
42  $\geq 1$  cDDD or  $>1$  Rx of statins to more than 0.5 years (**Table 1**). On the other hand, the  
43  
44 median period of statin use was 5.1 years in the RCTs. Although there was a trend  
45  
46 toward more risk reduction of liver cancer with higher cumulative dose of statin use,  
47  
48 this defect might still result in overestimating the cancer-preventive effect of statins in  
49  
50 the observational studies.  
51  
52  
53  
54

55  
56 Second, clinical studies demonstrated that higher serum total cholesterol  
57  
58  
59  
60

1  
2  
3  
4 concentration was associated with decreased risk of liver cancer (**Supplementary**  
5  
6 **Table 3**).<sup>42-44</sup> Meanwhile, there were inverse association between use of non-statin  
7  
8 lipid-lowering drugs and risk of the liver cancer.<sup>35 38</sup> Meanwhile, because of the  
9  
10 contraindication, statins might not prescribed to the patients with the chronic liver  
11  
12 disease, which is known as a risk factor of liver cancer. Unfortunately, the  
13  
14 observational studies included in this analysis seldom adopted these factors for  
15  
16 adjustment. Actually, subgroup analysis of studies with adequate adjustment showed a  
17  
18 trend toward less risk reduction, indicating the potential of overestimate this  
19  
20 preventive effect by confounders.

21  
22  
23  
24  
25  
26 Third, the RCTs included lower risk population (patients with cardiovascular disease  
27  
28 rather than HBV /HCV infection), might not be powerful enough to investigate the  
29  
30 liver cancer outcomes, which were much rarer than cardiovascular events. In addition,  
31  
32 subgroup analysis of studies with higher baseline risk showed a trend toward more  
33  
34 decrease of liver cancer risk.

35  
36  
37  
38  
39 These reasons suggested that the observed modulation of cancer incidence cannot be  
40  
41 ascribable to a direct statin-mediated effect,<sup>20</sup> the exposure period, the indication (e.g.  
42  
43 hyperlipidemia) and contraindication (e.g. chronic liver disease) of statins might  
44  
45 overestimate its cancer-preventive effect.

46  
47  
48  
49 We found similar results in Western countries and Asian countries, which were  
50  
51 different from the meta-analysis conducted by Singh *et al.* which concluded that the  
52  
53 inverse association of statins with HCC was stronger in the Asian population.  
54  
55 Considering four more studies we included, this difference might be caused by the  
56  
57  
58  
59  
60

1  
2  
3  
4 insufficient data in their meta-analysis. Based on the pharmacokinetics, it is plausible  
5  
6 that lipophilic and hydrophilic statins will differ in their liver cancer prevention  
7  
8 qualities.<sup>21 22</sup> However, subgroup analysis of lipophilic and hydrophilic statins showed  
9  
10 similar results.  
11

12  
13 Besides the limitations described previously, there were some other limitations should  
14  
15 be noted. First, a significant heterogeneity was observed in the present meta-analysis,  
16  
17 which might results from the difference in study design. Results of subgroup analyses  
18  
19 would also be limited by this heterogeneity. Second, the adherence to statin therapy is  
20  
21 known to be associated with healthy lifestyle, which might affect the cancer  
22  
23 outcome.<sup>45</sup> Such information is hard to be captured in databases or medical record in  
24  
25 the observational studies.<sup>46</sup> Third, five observational studies were conducted using the  
26  
27 Taiwanese National Health Insurance Research Database (NHIRD),<sup>31 32 35-37</sup> although  
28  
29 they were not in the same period, these studies might contain overlapping groups of  
30  
31 patients. These limitations mentioned above might lead to confounding of overall  
32  
33 results from the present study, and should be considered in future studies aiming at  
34  
35 confirming the protective effects of statins on human cancer risk.  
36  
37

38  
39 The strengths of our meta-analysis were as follows: First, we performed a much more  
40  
41 comprehensive search and more subgroup analyses, compared with the previous  
42  
43 meta-analyses; Second, the methodological quality of the included studies were  
44  
45 reasonable good; Third, publication bias, which due to the tendency of not publishing  
46  
47 small studies with null results, were not found in our meta-analysis.  
48  
49

50  
51 Of note, preclinical studies have indicated that statins possess synergism with other  
52  
53  
54  
55

1  
2  
3  
4 therapeutic agents *in vitro* and *in vivo* for liver cancer.<sup>47 48</sup> Some clinical studies have  
5  
6 also demonstrated that statins would prolong survival in patients with advanced liver  
7  
8 cancer (**Supplementary Table 4**),<sup>49-52</sup> and associated with risk reduction of  
9  
10 recurrence after curative surgery in patients of HBV related HCC.<sup>53</sup> Therefore,  
11  
12 considerable interest exists in adjunctive therapy with statins for liver cancer. In fact,  
13  
14 there were some RCTs ongoing to determine the effectiveness of pravastatin, when  
15  
16 used in combination with sorafenib, in the treatment of liver cancer (**Supplementary**  
17  
18 **Table 5**).

19  
20  
21  
22  
23  
24 Currently, physicians are less likely to prescribe statins for patients with chronic liver  
25  
26 disease, based on the concerns about the statin-induced liver injury.<sup>31</sup> However, there  
27  
28 were number of studies have demonstrated the safe use, even salutary effects.<sup>54-56</sup>  
29  
30  
31 Meanwhile, the risk of serious statin-related liver injury appears to be no greater than  
32  
33 the background incidence of this rare event.<sup>57</sup> Therefore, considering their benefits for  
34  
35 cardiovascular event prevention and the potential effect in liver cancer prevention and  
36  
37 treatment, statins should not be denied to these patients.  
38  
39

40  
41 In conclusion, our results suggest that statin use is associated with a significant risk  
42  
43 reduction of liver cancer, when taken daily for cardiovascular event prevention.  
44  
45 However, this preventive effect might be overestimated due to the exposure period,  
46  
47 indication and contraindication of statins, and other confounders. Statins might be  
48  
49 considered as an adjuvant in the treatment of liver cancer.  
50  
51  
52  
53  
54  
55  
56  
57  
58  
59  
60



**ACKNOWLEDGEMENT**

We thank Medjaden Bioscience Limited and Gui Lv for assisting in the preparation and revision of this manuscript.

**CONTRIBUTORSHIP STATEMENT**

XB Cui had the original idea, M Shi, XB Cui and W Gong worked together to develop an appropriate theoretical framework and design. XB Cui developed the search, M Shi and XB Cui were involved in the selection process. M Shi and XB Cui extracted relevant data, XB Cui and W Gong performed the statistical analysis and all authors were involved in the data interpretation. M Shi and B Nie wrote the manuscript draft and revised the draft based on input from the other authors. All authors revised it critically for content and approved the final version.

**COMPETING INTERESTS**

There are no competing interests

**FUNDING**

None.

**DATA SHARING**

No additional data available.

**REFERENCES:**

1. Baigent C, Keech A, Kearney PM, *et al.* Efficacy and safety of cholesterol-lowering treatment: prospective meta-analysis of data from 90,056 participants in 14 randomised trials of statins. *Lancet* 2005;**366**(9493):1267-78.
2. Newman TB, Hulley SB. Carcinogenicity of lipid-lowering drugs. *JAMA* 1996;**275**(1):55-60.
3. Demierre MF, Higgins PD, Gruber SB, *et al.* Statins and cancer prevention. *Nat Rev Cancer* 2005;**5**(12):930-42.
4. Zeichner S, Mihos CG, Santana O. The pleiotropic effects and therapeutic potential of the hydroxy-methyl-glutaryl-CoA reductase inhibitors in malignancies: A comprehensive review. *J Cancer Res Ther* 2012;**8**(2):176-83.
5. Lonardo A, Loria P. Potential for statins in the chemoprevention and management of hepatocellular carcinoma. *J Gastroenterol Hepatol* 2012;**27**(11):1654-64.
6. Shimoyama S. Statins are logical candidates for overcoming limitations of targeting therapies on malignancy: their potential application to gastrointestinal cancers. *Cancer Chemother Pharmacol* 2011;**67**(4):729-39.
7. Dale KM, Coleman CI, Henyan NN, *et al.* Statins and cancer risk: a meta-analysis. *JAMA* 2006;**295**(1):74-80.
8. Browning DRL, Martin RM. Statins and risk of cancer: A systematic review and metaanalysis. *Int J Cancer* 2007;**120**(4):833-43.
9. Kuoppala J, Lamminpaa A, Pukkala E. Statins and cancer: A systematic review and meta-analysis. *Eur J Cancer* 2008;**44**(15):2122-32.
10. Baigent C, Blackwell L, Emberson J, *et al.* Efficacy and safety of more intensive lowering of LDL cholesterol: a meta-analysis of data from 170,000 participants in 26 randomised trials. *Lancet* 2010;**376**(9753):1670-81.
11. Undela K, Srikanth V, Bansal D. Statin use and risk of breast cancer: a meta-analysis of observational studies. *Breast Cancer Res Treat* 2012;**135**(1):261-9.
12. Shimoyama S. Statins and gastric cancer risk. *Hepatogastroenterology* 2011;**58**(107-108):1057-61.
13. Cui X, Xie Y, Chen M, *et al.* Statin use and risk of pancreatic cancer: a meta-analysis. *Cancer Causes Control* 2012;**23**(7):1099-111.
14. Bansal D, Undela K, D'Cruz S, *et al.* Statin Use and Risk of Prostate Cancer: A Meta-Analysis of Observational Studies. *PLoS One* 2012;**7**(10):e46691.
15. Bardou M, Barkun A, Martel M. Effect of statin therapy on colorectal cancer. *Gut* 2010;**59**(11):1572-85.
16. Singh S, Singh PP, Singh AG, *et al.* Statins Are Associated With a Reduced Risk of Hepatocellular Cancer: A Systematic Review and Meta-analysis. *Gastroenterology* 2013;**144**(2):323-32.
17. Stein EA, Corsini A, Gimpelewicz CR, *et al.* Fluvastatin treatment is not associated with an increased incidence of cancer. *Int J Clin Pract* 2006;**60**(9):1028-34.
18. Matsushita Y, Sugihara M, Kaburagi J, *et al.* Pravastatin use and cancer risk: a meta-analysis of individual patient data from long-term prospective controlled trials in Japan. *Pharmacoepidemiol Drug Saf* 2010;**19**(2):196-202.
19. Emberson JR, Kearney PM, Blackwell L, *et al.* Lack of effect of lowering LDL cholesterol on cancer: meta-analysis of individual data from 175,000 people in 27 randomised trials of statin therapy.

- 1  
2  
3 PLoS One 2012;**7**(1):e29849.
- 4 20. Gazerro P, Bifulco M. Statins and Cancer in Gastroenterology: New Insight? *Gastroenterology*  
5 2013;**144**(7):1572-3.
- 6 21. Gazerro P, Proto MC, Gangemi G, *et al.* Pharmacological actions of statins: a critical appraisal in  
7 the management of cancer. *Pharmacol Rev* 2012;**64**(1):102-46.
- 8 22. Gronich N, Rennert G. Beyond aspirin - Cancer prevention with statins, metformin and  
9 bisphosphonates. *Nat Rev Clin Oncol* 2013;**10**(11):625-42.
- 10 23. Moher D, Liberati A, Tetzlaff J, *et al.* Preferred reporting items for systematic reviews and  
11 meta-analyses: the PRISMA statement. *BMJ* 2009;**339**:b2535.
- 12 24. GA Wells, B Shea, D O'Connell, *et al.* The Newcastle-Ottawa Scale (NOS) for assessing the quality of  
13 nonrandomised studies in meta-analyses.  
14 [http://www.ohri.ca/programs/clinical\\_epidemiology/oxford.asp](http://www.ohri.ca/programs/clinical_epidemiology/oxford.asp).
- 15 25. Higgins JP, Thompson SG, Deeks JJ, *et al.* Measuring inconsistency in meta-analyses. *BMJ*  
16 2003;**327**(7414):557-60.
- 17 26. METABIAS: Stata module to test for small-study effects in meta-analysis [program], 2009.
- 18 27. Altman DG, Bland JM. Interaction revisited: the difference between two estimates. *BMJ*  
19 2003;**326**(7382):219.
- 20 28. Friis S, Poulsen AH, Johnsen SP, *et al.* Cancer risk among statin users: A population-based cohort  
21 study. *Int J Cancer* 2005;**114**(4):643-7.
- 22 29. Friedman GD, Flick ED, Udaltsova N, *et al.* Screening statins for possible carcinogenic risk: up to 9  
23 years of follow-up of 361,859 recipients. *Pharmacoepidemiol Drug Saf* 2008;**17**(1):27-36.
- 24 30. Marelli C, Gunnarsson C, Ross S, *et al.* Statins and Risk of Cancer A Retrospective Cohort Analysis of  
25 45,857 Matched Pairs From an Electronic Medical Records Database of 11 Million Adult  
26 Americans. *J Am Coll Cardiol* 2011;**58**(5):530-7.
- 27 31. Tsan YT, Lee CH, Wang JD, *et al.* Statins and the risk of hepatocellular carcinoma in patients with  
28 hepatitis B virus infection. *J Clin Oncol* 2012;**30**(6):623-30.
- 29 32. Tsan YT, Lee CH, Ho WC, *et al.* Statins and the risk of hepatocellular carcinoma in patients with  
30 hepatitis C virus infection. *J Clin Oncol* 2013;**31**(12):1514-21.
- 31 33. Khurana V, Saluja A, Caldito G, *et al.* Statins are protective against hepatocellular cancer in patients  
32 with hepatitis C virus infection: Half a million US veterans' study. *Gastroenterology*  
33 2005;**128**(4, Suppl. 2):A714.
- 34 34. El-Serag HB, Johnson ML, Hachem C, *et al.* Statins are associated with a reduced risk of  
35 hepatocellular carcinoma in a large cohort of patients with diabetes. *Gastroenterology*  
36 2009;**136**(5):1601-8.
- 37 35. Chiu HF, Ho SC, Chen CC, *et al.* Statin use and the risk of liver cancer: a population-based  
38 case-control study. *Am J Gastroenterol* 2011;**106**(5):894-8.
- 39 36. Lai SW, Liao KF, Lai HC, *et al.* Statin use and risk of hepatocellular carcinoma. *Eur J Epidemiol*  
40 2013;**28**(6):485-92.
- 41 37. Leung HW, Chan AL, Lo D, *et al.* Common cancer risk and statins: a population-based case-control  
42 study in a Chinese population. *Expert Opin Drug Saf* 2013;**12**(1):19-27.
- 43 38. Chaiteerakij R, Yang JD, Harmsen WS, *et al.* Risk factors for intrahepatic cholangiocarcinoma:  
44 association between metformin use and reduced cancer risk. *Hepatology* 2013;**57**(2):648-55.
- 45 39. Singh S, Singh PP, Roberts LR, *et al.* Chemopreventive strategies in hepatocellular carcinoma. *Nat*  
46 *Rev Gastroenterol Hepatol* 2014;**11**(1):45-54.
- 47  
48  
49  
50  
51  
52  
53  
54  
55  
56  
57  
58  
59  
60

- 1
- 2
- 3 40. Pradelli D, Soranna D, Scotti L, *et al.* Statins and primary liver cancer: a meta-analysis of
- 4 observational studies. *Eur J Cancer Prev* 2013;**22**(3):229-34.
- 5
- 6 41. Zhang H, Gao C, Fang L, *et al.* Statin use and risk of liver cancer: A meta-analysis of 7 studies
- 7 involving more than 4.7 million patients. *World J Meta-Anal* 2013;**1**(3):130-7.
- 8
- 9 42. Ahn J, Lim U, Weinstein SJ, *et al.* Prediagnostic total and high-density lipoprotein cholesterol and
- 10 risk of cancer. *Cancer Epidemiol Biomarkers Prev* 2009;**18**(11):2814-21.
- 11
- 12 43. Iso H, Ikeda A, Inoue M, *et al.* Serum cholesterol levels in relation to the incidence of cancer: the
- 13 JPHC study cohorts. *Int J Cancer* 2009;**125**(11):2679-86.
- 14
- 15 44. Kitahara CM, de Gonzalez AB, Freedman ND, *et al.* Total Cholesterol and Cancer Risk in a Large
- 16 Prospective Study in Korea. *J Clin Oncol* 2011;**29**(12):1592-8.
- 17
- 18 45. Brookhart MA, Patrick AR, Dormuth C, *et al.* Adherence to lipid-lowering therapy and the use of
- 19 preventive health services: an investigation of the healthy user effect. *Am J Epidemiol*
- 20 2007;**166**(3):348-54.
- 21
- 22 46. Boudreau DM, Yu O, Johnson J. Statin use and cancer risk: a comprehensive review. *Expert Opin*
- 23 *Drug Saf* 2010;**9**(4):603-21.
- 24
- 25 47. Kim W, Yoon JH, Kim JR, *et al.* Synergistic anti-tumor efficacy of lovastatin and protein kinase
- 26 C-beta inhibitor in hepatocellular carcinoma. *Cancer Chemother Pharmacol*
- 27 2009;**64**(3):497-507.
- 28
- 29 48. Polo MP, Crespo R, de Bravo MG. Geraniol and simvastatin show a synergistic effect on a human
- 30 hepatocarcinoma cell line. *Cell Biochem Funct* 2011;**29**(6):452-8.
- 31
- 32 49. Kawata S, Yamasaki E, Nagase T, *et al.* Effect of pravastatin on survival in patients with advanced
- 33 hepatocellular carcinoma. A randomized controlled trial. *Br J Cancer* 2001;**84**(7):886-91.
- 34
- 35 50. Lersch C, Schmelz R, Erdmann J, *et al.* Treatment of HCC with pravastatin, octreotide, or
- 36 gemcitabine - A critical evaluation. *Hepatogastroenterology* 2004;**51**(58):1099-103.
- 37
- 38 51. Graf H, Jungst C, Straub G, *et al.* Chemoembolization combined with pravastatin improves survival
- 39 in patients with hepatocellular carcinoma. *Digestion* 2008;**78**(1):34-8.
- 40
- 41 52. Georgescu EF, Badulescu F, Dumitrescu D, *et al.* Lovastatin may enhance cytostatic effects of
- 42 sorafenib in hepatic carcinoma. Primary results of a pilot study. *Hepatol Int* 2011;**5**(1):423.
- 43
- 44 53. Wu CY, Chen YJ, Ho HJ, *et al.* Association between nucleoside analogues and risk of hepatitis B
- 45 virus-related hepatocellular carcinoma recurrence following liver resection. *JAMA*
- 46 2012;**308**(18):1906-14.
- 47
- 48 54. Lewis JH, Mortensen ME, Zweig S, *et al.* Efficacy and safety of high-dose pravastatin in
- 49 hypercholesterolemic patients with well-compensated chronic liver disease: Results of a
- 50 prospective, randomized, double-blind, placebo-controlled, multicenter trial. *Hepatology*
- 51 2007;**46**(5):1453-63.
- 52
- 53 55. Nelson A, Torres DM, Morgan AE, *et al.* A pilot study using simvastatin in the treatment of
- 54 nonalcoholic steatohepatitis: A randomized placebo-controlled trial. *J Clin Gastroenterol*
- 55 2009;**43**(10):990-4.
- 56
- 57 56. Lewis JH. Clinical Perspective: Statins and the Liver-Harmful or Helpful? *Dig Dis Sci*
- 58 2012;**57**(7):1754-63.
- 59
- 60 57. Bader T. The myth of statin-induced hepatotoxicity. *Am J Gastroenterol* 2010;**105**(5):978-80.

**Figure legends:**

**Figure 1.** Flow chart of study selection in the present meta-analysis.

**Figure 2.** Overall meta-analysis of the statin use and the liver cancer risk.

**Supplementary Figure 1.** Influence analysis.

**Supplementary Figure 2.** Subgroup analyses based on study design.

**Supplementary Figure 3.** Subgroup analyses based on baseline risk of liver cancer.

**Supplementary Figure 4.** Subgroup analyses based on confounder adjustment.

**Supplementary Figure 5.** Subgroup analyses based on study location.

**Supplementary Figure 6.** Subgroup analyses based on pharmacokinetic of statins.

**Supplementary Figure 7.** Subgroup analysis of higher cumulative dose of statin use.

**Table 1.** Study characteristics

| Studies                                  | Study design | Patient population                                                      | Study period | Cases defined | Follow-up      | Statins type         | Dosage/Duration of Statin use |
|------------------------------------------|--------------|-------------------------------------------------------------------------|--------------|---------------|----------------|----------------------|-------------------------------|
| Emberson, 2012, UK <sup>19</sup>         | RCT          | IPD analysis of 22 RCTs                                                 | -            | ICD-9 155     | 5.1 years (Me) | A, F, L, P, R, S     | 5.1 years (Me)                |
| Friis, 2005, North Jutland <sup>28</sup> | Cohort       | General population (CPR)                                                | 1989-2002    | ICD-10 C22    | 3.3 years (M)  | Unspecified          | ≥2 Rx                         |
| Friedman, 2008, USA <sup>29</sup>        | Cohort       | General population (KPMCP)                                              | 1994-2003    | ICD-9-CM 155  | > 2 years      | A, L, S (97.6%)      | ≥1 Rx                         |
| Marelli, 2011, USA <sup>30</sup>         | Cohort       | General older population (men ≥ 45 and women ≥ 55 years; GE Centricity) | 1990-2009    | ICD-9 155     | 4.6 years (M)  | Unspecified          | ≥1 cDDD                       |
| Tsan, 2012, Taiwan <sup>31</sup>         | Cohort       | Patients with HBV infection (NHIRD)                                     | 1997-2008    | ICD-9 155     | 9.9 years (M)  | A, F, L, P, R, and S | ≥28 cDDDs                     |
| Tsan, 2013, Taiwan <sup>32</sup>         | Cohort       | Patients with HCV infection (NHIRD)                                     | 1999-2010    | ICD-9 155     | 10.7 years (M) | A, F, L, P, R, and S | ≥28 cDDDs                     |
| Khurana, 2005, USA <sup>33</sup>         | Case control | General population (VISN)                                               | 1997-2002    | ICD-9 155     | NR             | Unspecified          | ≥1 Rx                         |
| El-Serag, 2009, USA <sup>34</sup>        | Case control | Diabetes patients (VA)                                                  | 1997-2002    | ICD-9-CM 155  | 2.4 years (M)  | A, C, F, L, P, and S | 1.6 years (M)                 |
| Chiu, 2011, Taiwan <sup>35</sup>         | Case control | Older patients (≥ 50 years; NHIRD)                                      | 2005–2008    | ICD-9-CM 155  | NR             | A, F, L, P, R, and S | ≥ 1 cDDD                      |
| Lai, 2013, Taiwan <sup>36</sup>          | Case control | General population (NHIRD)                                              | 2000-2009    | ICD-9-CM 155  | 1.4 years (M)  | A, F, L, P, R, and S | ≥1 Rx                         |
| Leung, 2013, Taiwan <sup>37</sup>        | Case control | General population (NHIRD)                                              | 2000-2008    | ICD-9-CM 155  | 4.1 years (M)  | Unspecified          | > 0.5 years                   |
| Chaiteerakij, 2013, USA <sup>38</sup>    | Case control | Hyperlipidemia patients (Mayo Clinic)                                   | 2000-2010    | ICD-9-CM 155  | >1 years       | Unspecified          | ≥1 Rx                         |

Patients population: IPD = Individual patient data, RCT = randomized controlled trials, CPR = the Central Population Register of Danish citizens, KPMCP = the Kaiser Permanente Medical Care Program in northern California, GE Centricity = the General Electric Centricity database, NHIRD = the Taiwanese National Health Insurance research database, VISN = Veterans Integrated Service Networks 16 Veteran Affairs database, VA = Veterans Affairs national databases, Mayo Clinic = Mayo Clinic (Rochester, MN), HBV = hepatitis B virus; Cases defined: ICD-9 or -10 = International Classification of Diseases, Ninth Revision or Tenth Revision, CM = Clinical Modification; Duration of follow-up: When the follow-up periods of statin user and nonuser were different, only the shorter one was showed, and all periods were transformed to years; Statin type: A = Atorvastatin, C = Cerivastatin, F = Fluvastatin, L = Lovastatin, P = Pravastatin, R = Rosuvastatin, S = Simvastatin, Non-statin = Non-statin cholesterol-lowering drug(s) only; Duration of statin use: M = Mean, Me = Median, ≥1 cDDD = more than 1 cumulative defined daily dose before the diagnosis of liver cancer, Rx = prescriptions.

1  
2  
3  
4  
5  
6  
7  
8  
9  
10  
11  
12  
13  
14  
15  
16  
17  
18  
19  
20  
21  
22  
23  
24  
25  
26  
27  
28  
29  
30  
31  
32  
33  
34  
35  
36  
37  
38  
39  
40  
41  
42  
43  
44  
45  
46  
47  
48  
49

**Table 2.** Study data

| Studies                                   | Intervention/ Cases           |              | Control                       |              | Measurements of effect estimates | Crude RR with 95% CIs | Adjusted RR with 95% CIs | Confounders for adjustment      |
|-------------------------------------------|-------------------------------|--------------|-------------------------------|--------------|----------------------------------|-----------------------|--------------------------|---------------------------------|
|                                           | No. of event/ No. of exposure | No. of total | No. of event/ No. of exposure | No. of total |                                  |                       |                          |                                 |
| Emberson, 2012, UK <sup>19</sup>          | 35                            | 67258        | 33                            | 67279        | RR                               | 1.06 (0.66, 1.71)*    | 1.06 (0.66, 1.71)*       | Randomization                   |
| Friis, 2005, North Jutland <sup>28</sup>  | 1                             | 12251        | 166                           | 334754       | OR                               | NA                    | 1.16 (0.46-2.90)         | 1,2, 16, 21, 23                 |
| Friedman(Male), 2008, USA <sup>29</sup>   | 32                            | 192598       | NA                            | 1904876      | HR                               | NA                    | 0.49 (0.34-0.70)         | 16                              |
| Friedman(Female), 2008, USA <sup>29</sup> | 10                            | 169261       | NA                            | 1976332      | HR                               | NA                    | 0.40 (0.21-0.75)         |                                 |
| Marelli, 2011, USA <sup>30</sup>          | 13                            | 45857        | 24                            | 45857        | RR                               | 0.31 (0.14-0.68)*     | 0.31 (0.14-0.68)*        | 1-5, 14, 16-18, 26, 27          |
| Tsan, 2012, Taiwan <sup>31</sup>          | 58                            | 2785         | 963                           | 30628        | HR                               | 0.66 (0.51- 0.86)     | 0.47 (0.36-0.61)         | 1, 2, 7, 8, 11, 12              |
| Tsan, 2013, Taiwan <sup>32</sup>          | 1378                          | 35023        | 26505                         | 225841       | HR                               | 0.42 (0.39-0.46)      | 0.53 (0.49–0.58)         | 1, 2, 7, 8, 11, 13              |
| Khurana, 2005, USA <sup>33</sup>          | NA                            | NA           | NA                            | NA           | OR                               | NA                    | 0.52 (0.41- 0.67)        | 1, 11, 13                       |
| El-Serag, 2009, USA <sup>34</sup>         | 447                           | 1303         | 2766                          | 5212         | OR                               | 0.46 (0.40-0.52)      | 0.74 (0.64-0.87)         | 1-3, 6, 8, 9, 11-13, 21, 24, 28 |
| Chiu, 2011, Taiwan <sup>35</sup>          | 117                           | 1166         | 195                           | 1166         | OR                               | 0.53 (0.41-0.69)      | 0.62 (0.45-0.83)         | 1, 2, 8, 9, 11, 12, 20, 29      |
| Lai, 2013, Taiwan <sup>36</sup>           | 255                           | 3480         | 1635                          | 13920        | OR                               | 0.61 (0.52–0.72)      | 0.71 (0.56–0.89)         | 1, 2, 8-13, 22, 24, 25          |
| Leung, 2013, Taiwan <sup>37</sup>         | 26                            | 424          | 6851                          | 33781        | HR                               | 0.45 (0.30-0.67)      | 0.44 (0.28, 0.72)        | 1, 2, 11, 15, 20, 21, 23        |
| Chaiteerakij, 2013, USA <sup>38</sup>     | 72                            | 165          | 165                           | 256          | OR                               | NA                    | 0.6 (0.4-0.9)            | 1-3, 8, 11, 17, 22, 28, 30      |

The RR with an asterisk mark (\*) was calculated based on the raw data. The others, crude or adjusted, were extracted from the original paper; Confounders for adjustment: 1 = age, 2 = sex, 3 = race, 4 = BMI, 5 = smoking status, 6 = ethanol intake, 7 = socioeconomic status, 8 = cirrhosis, 9 = alcoholic liver disease, 10 = non-alcoholic fatty liver disease, 11 = diabetes mellitus, 12 = HBV infection, 13 = HCV infection, 14 = concomitant diagnoses (unspecified), 15 = Charlson score, 16 = calendar year, 17 = cholesterol (totalcholesterol, VLDL, LDL, or triglycerides), 18 = prostate-specific antigen, 19 = resection extent, 20 = other lipid-lowering agents, 21 = cardiovascular medications (aspirin, nonsteroidal anti-inflammatory medications, or angiotensin-converting enzymes inhibitors), 22 = metformin or thiazolidinedione, 23 = hormone-replacement therapy, 24 = HCV treatment, 25 = HBV treatment, 26 = medications taken (unspecified), 27 = the number of office visits, 28 = propensity to use statins, 29 = hospital stay, 30 = biliary tract diseases

Table 3. Subgroup analyses of included studies

| Subgroup                           | No. of studies (reports) | Summary RR ( 95% CIs) | Heterogeneity, I <sup>2</sup> | Heterogeneity, P value | P <sub>interaction</sub> |          |
|------------------------------------|--------------------------|-----------------------|-------------------------------|------------------------|--------------------------|----------|
| Study design                       | RCT                      | 1                     | 1.06 (0.66-1.71)              | -                      | -                        | P = 0.01 |
|                                    | Observational studies    | 11(12)                | 0.57(0.50-0.64)               | 61%                    | P = 0.003                |          |
| Observational studies              | Cohort studies           | 5 (6)                 | 0.51 (0.44–0.58)              | 18%                    | P = 0.30                 | P = 0.04 |
|                                    | Case-control studies     | 6                     | 0.63 (0.54–0.73)              | 46%                    | P = 0.10                 |          |
| Baseline risk of liver cancer      | Higher baseline risk     | 4                     | 0.52 (0.47-0.59)              | 16%                    | P = 0.31                 | P = 0.08 |
|                                    | General population       | 8 (9)                 | 0.63 (0.52–0.75)              | 59%                    | P = 0.01                 |          |
| Confounding adjustment             | Adequate adjustment      | 6                     | 0.64(0.53-0.77)               | 81%                    | P = 0.0001               | P = 0.08 |
|                                    | Inadequate adjustment    | 6 (7)                 | 0.51 (0.43-0.60)              | 3%                     | P = 0.40                 |          |
| Study location                     | Western studies          | 7 (8)                 | 0.61 (0.48-0.76)              | 64%                    | P = 0.007                | P = 0.54 |
|                                    | Asian studies            | 5                     | 0.56 (0.48-0.64)              | 51%                    | P = 0.09                 |          |
| Pharmacokinetic                    | Hipophilic statins       | 5 (6)                 | 0.57 (0.50-0.65)              | 50%                    | P = 0.08                 | P = 0.86 |
|                                    | Hydrophilia statins      | 3                     | 0.59(0.41–0.84)               | 50%                    | P = 0.13                 |          |
| Higher cumulative dosage of statin |                          | 6                     | 0.53 (0.36-0.79)              | 90%                    | P<0.0001                 | -        |

RR = relative risk; higher baseline risk of liver cancer: patients with older age, HBV or HCV infection. Adequate adjustment: RCT or studies which adjusted for at least 4 of 7 important confounders, such as HBV infection, HCV infection, cirrhosis, alcoholic liver disease, NAFLD, HBV treatment, or HCV treatment; Lipophilic statins: Atorvastatin, Fluvastatin, Lovastatin, or Simvastatin; Hydrophilia statins: Pravastatin or Rosuvastatin; Higher cumulative dosage of statin use: > 180cumulative defined daily dose or Duration of statin use > 0.5 years before the diagnosis of liver cancer.



## Statin use and risk of liver cancer: an update meta-analysis

Meng Shi<sup>1</sup>, Huiling Zheng<sup>1</sup>, Biao Nie<sup>1</sup>, Wei Gong<sup>1\*</sup> and Xiaobing Cui<sup>1\*</sup>

<sup>1</sup>Guangdong Provincial Key Laboratory of Gastroenterology, Department of Gastroenterology, Nanfang Hospital, Southern Medical University, No. 1838 Guangzhou Avenue North, Guangzhou 510515, China

\*Correspondence to Dr. Xiaobing Cui, Email: [xbing119@gmail.com](mailto:xbing119@gmail.com); and Dr. Wei Gong, Email: [drgwei@foxmail.com](mailto:drgwei@foxmail.com).

**Running title:** Meta-analysis: statin and liver cancer

**Key words:** *Statin; Liver cancer; Cancer Prevention; Meta-analysis.*

**Abstract**

**Objective:** Statins are commonly prescribed cholesterol-lowering drugs. Preclinical studies suggest that statins may possess cancer preventive properties. The primary objective of this meta-analysis was to determine the association between the statin use and the risk of liver cancer.

**Design:** Meta-analysis.

**Setting:** International.

**Participants:** A comprehensive literature search of PubMed, BIOSIS Previews, Web of Science, EMBASE, EBSCO and Cochrane Library was conducted through March 2014. The effect estimate was reported as pooled relative risk (RR) with 95% confidence intervals (CIs), using the random-effects model.

**Results:** A total of 12 studies (one individual patient data analysis of 22 randomized controlled trials, 5 cohorts, and 6 case-controls) were qualified for this meta-analysis, involving 5,640,313 participants including 35,756 liver cancer cases. Our results indicated a significant risk reduction of liver cancer among all statin users (RR 0.58, 95%CIs 0.51–0.67). The difference of the study designs can partly explained the significant heterogeneity found in the overall analysis ( $I^2 = 65%$ ,  $P = 0.0006$ ). No evidence of publication bias was observed in this meta-analysis. Similar risk reductions were found in the subgroups analysis of Western and Asian countries, lipophilic and hydrophilia statins. There was a trend toward more risk reductions in subgroups with higher baseline risk, inadequate adjustment, and higher cumulative dosage of statin use.

1  
2  
3  
4 **Conclusions:** This meta-analysis suggests that the statin is associated with a  
5  
6 significant risk reduction of liver cancer, when taken daily for cardiovascular event  
7  
8 prevention. However, this preventive effect might be overestimated due to the  
9  
10 exposure period, the indication and contraindication of statins, and other confounders.  
11  
12  
13  
14 Statins might be considered as an adjuvant in the treatment of liver cancer.

15  
16 **Key words:** *Statin; Liver cancer; Cancer Prevention; Meta-analysis.*  
17  
18  
19  
20

### 21 **Strengths and limitations of this study**

22  
23 Statins are commonly prescribed as cholesterol-lowering drugs. In this comprehensive  
24  
25 meta-analysis, we demonstrate that the statin use is associated with a significant risk  
26  
27 reduction of liver cancer.  
28  
29

30  
31 The difference of the study designs is the part reason that explained the significant  
32  
33 heterogeneity found in the overall analysis.  
34  
35

36  
37 However, this preventive effect might be overestimated due to the exposure period,  
38  
39 the indication and contraindication of statins, and other confounders.

40  
41 Statins might be considered as an adjuvant in the treatment of liver cancer.  
42  
43  
44  
45  
46  
47  
48  
49  
50  
51  
52  
53  
54  
55  
56  
57  
58  
59  
60

## Introduction

Statins are inhibitors of 3-hydroxy-3-methylglutaryl coenzyme-A (HMG-CoA) reductase and they are widely used to reduce the plasma cholesterol level and the risk of cardiovascular events.<sup>1</sup> Although there is a concern over their possible carcinogenicity raised in rodent studies,<sup>2</sup> preclinical studies indicate that statins have anticancer properties *in vitro* and *in vivo*, through inhibiting angiogenesis, inducing apoptosis, and suppressing tumor growth and metastasis.<sup>3-5</sup>

However, higher concentrations of statins are typically required to induce these effects, raising questions concerning the therapeutic relevance of statins on cancer.<sup>6</sup>

To date, clinical studies regarding the cancer incidence associated with statin administration have highlighted conflicting results. Moreover, a large number of meta-analyses have concluded that there was no association between statin use and risk of overall cancer,<sup>7-10</sup> or cancer of breast<sup>11</sup>, stomach,<sup>12</sup> or pancreas.<sup>13</sup> There is only a modest protective effect of statins in prostate cancer<sup>14</sup> and colorectal cancer.<sup>15</sup>

In contrary, recent studies reported encouraging results for risk reduction of liver cancer among all statin users. Previous meta-analysis, conducted by Singh *et al.* by including 10 studies, found that statin users were less likely to develop hepatocellular carcinoma (HCC) than statin non-users.<sup>16</sup> However, Singh *et al.* included the ALERT, LIPS, and MEGA trials twice, by including three individual patient data (IPD) analysis of randomized controlled trials (RCTs).<sup>17-19</sup> Meanwhile, some factors of stratification were not considered in their analyses, such as dose and timing of exposure to statins, and the selection of controls and confounders, which might limit

1  
2  
3 the evaluation of cancer risk.<sup>20</sup> Furthermore, the lipophilic statins are accompanied by  
4  
5 an extensive first-pass effect at the hepatic level.<sup>21</sup> It is plausible that lipophilic statins  
6  
7 may have a better liver cancer preventive qualities than the hydrophilic ones.<sup>22</sup>  
8  
9

10  
11 Therefore, we performed this updated meta-analysis to assess the association between  
12  
13 the statin use and the risk of liver cancer, involving the recently published studies and  
14  
15 conducting more subgroup analyses based on the factors mentioned above. Our results  
16  
17 demonstrated that statin use was associated with an over 40% risk reduction in liver  
18  
19 cancer, which may have a significant translational potential in the clinical practice.  
20  
21  
22 However, there were some confounders might overestimate this preventive effect of  
23  
24 statins.  
25  
26  
27

## 28 **MATERIALS AND METHODS**

### 29 *Literature Search strategy*

30  
31 This meta-analysis was conducted following the PRISMA guidelines.<sup>23</sup>  
32  
33

34  
35 The systematic computerized search for eligible studies were performed on the  
36  
37 database of PubMed, BIOSIS Previews, Web of Science, EMBASE, EBSCO, and  
38  
39 Cochrane Library, covering all studies published from their inception to March 5,  
40  
41 2014. The following terms were searched with both the subjects (MeSH terms) and  
42  
43 text-word search strategies: “(Statin OR HMG-CoA reductase inhibitors OR  
44  
45 Atorvastatin OR Cerivastatin OR Fluvastatin OR Lovastatin OR Pravastatin OR  
46  
47 Rosuvastatin OR Simvastatin) AND (Hepatocellular OR Hepatic OR Intrahepatic OR  
48  
49 Interlobular OR Liver) AND (Carcinoma OR Sarcomas OR Angiosarcoma OR Cancer  
50  
51 OR Neoplasm). Additionally, the relevant reviews and retrieved articles were searched  
52  
53  
54  
55  
56  
57  
58  
59  
60

1  
2  
3  
4 manually for more eligible studies.

5  
6 In study searching, only the original researches, published in form of peer review  
7  
8 article or meeting abstract, were included. No language restrictions were imposed.  
9  
10  
11 However, the studies we included were all published in English.  
12

### 13 ***Study selection***

14  
15 The inclusion criteria were: (1) randomized controlled trial (RCTs), cohort studies or  
16  
17 case-control studies; (2) original studies that assessed the effect of statin use on the  
18  
19 risk of liver cancer, compared with placebo or no treatment; (3) liver cancer cases  
20  
21 were identified according to the International Classification of Diseases codes (ICD);  
22  
23 and (4) studies with estimate of relative risk (risk ratio, RR) of liver cancer, or with  
24  
25 data sufficient to calculate it.  
26  
27  
28  
29

30  
31 The exclusion criteria were: (1) study design not meeting the inclusion criteria; (2)  
32  
33 studies without estimate of RR, or without sufficient data to calculate it; or (3) studies  
34  
35 with duplicated or overlap reports.  
36  
37  
38

### 39 ***Data extraction***

40  
41 Two independent investigators (M. Shi and X.B. Cui) extracted data from the eligible  
42  
43 studies using a predefined data collection form. The differences of data extraction  
44  
45 were resolved by consensus referring back to the original article. The extracted  
46  
47 information included: (1) Studies: first author, year of publication, study design,  
48  
49 location, patient populations, period, and follow-up; (2) Statins: type, dosage or  
50  
51 duration of statin use; (3) liver cancer: case identification, number of liver cancer,  
52  
53 crude RR with 95% confidence intervals (CIs), adjusted RR reflecting the greatest  
54  
55  
56  
57  
58  
59  
60

1  
2  
3  
4 degree of control for confounders, and confounders for adjustment (including  
5  
6 variables for matching). When the RR were not available, the RR with 95% CIs were  
7  
8 calculated from the raw data in original studies.  
9

10  
11 We extracted different measurements of effect estimates from original studies, such as  
12  
13 Relative Risk (RR), Odds Ratio (OR), Hazard Ratio (HR), and Observed/Expected  
14  
15 ratio. Due to the fact that the incidence of liver cancer was low in all studies, these  
16  
17 different measurements can be used to provide similar estimates of RR.  
18  
19

### 20 21 ***Methodological quality assessment*** 22

23  
24 Of note, the included RCT was pooled analysis of other RCTs, therefore, it is  
25  
26 inappropriate to assess the methodological quality. The methodological quality of  
27  
28 cohort and case-control studies were assessed on the Newcastle-Ottawa Scale,<sup>24</sup>  
29  
30 including eight items that were categorized three categories: selection (four items, one  
31  
32 star each), comparability (one item, up to two stars), and exposure/outcome (three  
33  
34 items, one star each). A “star” presents a “high” quality choice of each item.  
35  
36  
37  
38

### 39 ***Statistical analysis*** 40

41  
42 The overall meta-analysis was first performed, followed by the subgroup analyses,  
43  
44 based on study design, baseline risk of liver cancer, confounding adjustment, study  
45  
46 location, and pharmacokinetic. Meanwhile, we conducted subgroup analyses based on  
47  
48 studies which reported RR estimate for higher cumulative dosage of statin use, when  
49  
50 appropriate data were available.  
51  
52

53  
54 To take into account the heterogeneity and provide a more conservative estimate, the  
55  
56 inverse variance method was used to estimate the pooled RR and corresponding 95%  
57  
58  
59  
60

1  
2  
3  
4 CIs, and data were pooled using a random effects model. Heterogeneity was assessed  
5  
6 using the Chi-squared statistic ( $P$ ) together with the Higgins I-squared statistic ( $I^2$ ), a  
7  
8  $P$  value  $<0.10$  was considered statistically significant for heterogeneity; and an  $I^2$   
9  
10 value  $> 50\%$  was considered a measure of severe heterogeneity.<sup>25</sup>

11  
12  
13  
14 Publication bias was assessed using the Begg's test and the Egger's test.<sup>26</sup> Influence  
15  
16 analysis was performed to investigate the influence of a single study on the overall  
17  
18 meta-analysis estimate, by omitting one study in each turn. Test for interaction was  
19  
20 applied to identify the difference between pooled RR from subgroup analysis using  
21  
22 the method described by Altman and Bland.<sup>27</sup> All statistical tests were two-sided and  
23  
24  $P < 0.05$  was considered statistically significant, unless otherwise specified. Software  
25  
26 Review Manager (RevMan5.2, Copenhagen) and STATA (Stata 11.2, Texas) were  
27  
28 used for the statistical analysis.  
29  
30  
31  
32

## 33 34 **Results**

### 35 36 **Study selection**

37  
38 **Figure 1** illustrated the process of study selection for the meta-analysis. Of the 1424  
39  
40 potentially relevant references identified by electric and manual search, 142 were  
41  
42 selected for full-text review after screening titles and abstracts. Finally, a total of 12  
43  
44 studies were included, with one IPD analysis,<sup>19</sup> five cohort studies,<sup>28-32</sup> and six  
45  
46 case-control studies.<sup>33-38</sup> One case-control study was presented solely in abstract  
47  
48 form.<sup>33</sup>  
49  
50

51  
52  
53  
54 Of note, the cohort study conducted by Friedman *et al.* reported RR estimate  
55  
56 separately for different gender (male and female),<sup>29</sup> we considered these two reports  
57  
58  
59  
60



1  
2  
3  
4 as separate studies. Therefore, a total of thirteen reports were included for the present  
5  
6 meta-analysis.  
7

### 8 *Study characteristics*

9  
10 **Table 1** summarized the characteristics of qualified studies in this meta-analysis. The  
11  
12 12 studies, involving 5,640,313 participants with 35,756 liver cancer cases, were  
13  
14 published between 2005 and 2013. The “RCT” in the present study was pooled  
15  
16 analysis of 22 clinical trials,<sup>19</sup> which investigated statins therapy in cardiovascular  
17  
18 event prevention and reported the occurrence of liver cancer as adverse event. The  
19  
20 observational studies were conducted with the local or national health databases, the  
21  
22 statin exposure were identified by linkage to prescription databases, and the controls  
23  
24 were matched mainly by age, sex and index date. Except one cohort adopted ICD-10  
25  
26 C22,<sup>28</sup> all other studies identified liver cancer cases according to the ICD-9 155. Of  
27  
28 note, two cohorts were restricted to patients with HBV infection,<sup>31</sup> and HCV  
29  
30 infection;<sup>32</sup> one case-control only included patients with diabetes mellitus;<sup>34</sup> two  
31  
32 observational studies included patients aged at least 45 years.<sup>30 35</sup>  
33  
34  
35  
36  
37  
38  
39  
40

41 **Table 2** summarized the data of the included studies. In the RCT<sup>19</sup> and one cohort  
42  
43 study,<sup>30</sup> the RR with 95% CIs were calculated from the 2×2 tables defined by the  
44  
45 incidence of liver cancer and the statin use status. The observational studies reported  
46  
47 different measurements of RR estimates with adjustment by confounders. Several  
48  
49 observational studies adopted the important risk factors of liver cancer for  
50  
51 adjustments<sup>31 32 34-36</sup>, such as HBV infection, HCV infection, cirrhosis, alcoholic liver  
52  
53 disease, or non-alcoholic fatty liver disease (NAFLD).<sup>39</sup> Of note, only two studies  
54  
55  
56  
57  
58  
59  
60

1  
2  
3 adjusted for the cholesterol level,<sup>30 38</sup> and no study adjusted for the metabolic  
4  
5  
6 syndrome, which might also influence the risk of liver cancer.<sup>39</sup>  
7

### 8 9 *Methodological quality*

10  
11 For the cohort and case-control studies, the median score was 7 on the  
12  
13 Newcastle-Ottawa Scale, with a range of 5 to 8 (**Supplementary Table 1**). These  
14  
15 results indicated that the observational studies were in a reasonable good quality.  
16  
17

### 18 19 *Overall meta-analysis*

20  
21 **Figure 2** depicted the forest plot of RR estimate with 95% CIs from individual studies  
22  
23 and overall meta-analysis. In the overall meta-analysis, pooled results showed a  
24  
25 statistically significant decrease in the liver cancer risk among all statin users (RR  
26  
27 0.58, 95%CIs 0.51–0.67). Of note, a statistically significant heterogeneity was  
28  
29 observed ( $I^2 = 65\%$ ,  $P = 0.0006$ ). The  $P$ -values of Begg's test and Egger's test were  
30  
31 0.669 and 0.749, respectively, both suggesting there was no evidence of publication  
32  
33 bias. In the influence analysis, the omission of any individual studies did not alter the  
34  
35 direction and magnitude of the observed effect (**Supplementary Figure 1**).  
36  
37  
38  
39

### 40 41 *Subgroup analyses and Test for interaction*

42  
43 We first performed preplanned subgroup analyses based on study design, baseline risk  
44  
45 of liver cancer, confounding adjustment, and study location (**Table 3**).  
46  
47

48  
49 The RCT showed there is no significant association between statin use and risk of  
50  
51 liver cancer (RR 1.06, 0.66–1.71). But the observational studies indicated a significant  
52  
53 decrease of liver cancer risk among all statin users (RR 0.57, 0.50–0.64;  $I^2 = 61\%$ ,  $P =$   
54  
55 0.003) (**Figure 2**). Furthermore, we found a greater risk reduction in the subgroup  
56  
57  
58  
59  
60

1  
2  
3  
4 analysis of cohort studies (RR 0.51, 0.44–0.58;  $I^2 = 18\%$ ,  $P = 0.30$ ) than in the  
5  
6 case-control studies (RR 0.63, 0.54–0.73;  $I^2 = 46\%$ ,  $P = 0.10$ ) (**Supplementary**  
7  
8 **Figure 2**).

9  
10  
11 Test for interaction showed significant results between subgroups of the RCT and  
12  
13 observational studies ( $P_{\text{interaction}} = 0.01$ ,  $Z = 2.47$ ), and between subgroups of the  
14  
15 cohort and case-control studies ( $P_{\text{interaction}} = 0.04$ ,  $Z = -2.03$ ). These results indicated  
16  
17 that the difference of the study designs was the part reason that why there was severe  
18  
19 heterogeneity in the overall analysis (**Table 3**).

20  
21  
22 In the subgroup analysis of the four studies with higher baseline risk of liver  
23  
24 cancer,<sup>30-32 35</sup> defined as patients with older age, HBV or HCV infection, there was a  
25  
26 trend toward more decrease of liver cancer risk (RR 0.52, 0.47-0.59;  $I^2 = 16\%$ ,  $P =$   
27  
28 0.31) than in the other eight studies with general population<sup>19 28 29 33 34 36-38</sup> (RR 0.63,  
29  
30 0.52–0.75;  $I^2 = 59\%$ ,  $P = 0.01$ ) (**Supplementary Figure 3**).

31  
32  
33 We defined the RCT or studies adjusted for at least 4 of 7 important confounders,  
34  
35 such as HBV infection, HCV infection, cirrhosis, alcoholic liver disease, NAFLD,  
36  
37 HBV treatment, or HCV treatment,<sup>39</sup> were adjusted adequately. Subgroup analysis of  
38  
39 these six studies<sup>19 31 32 34-36</sup> found a trend toward less decrease of liver cancer risk (RR  
40  
41 0.64, 0.53-0.77;  $I^2 = 81\%$   $P = 0.0001$ ) than the other six studies<sup>28-30 33 37 38</sup> (RR, 0.51,  
42  
43 0.43-0.60;  $I^2 = 3\%$ ,  $P = 0.40$ ) (**Supplementary Figure 4**).

44  
45  
46 Subgroup analyses based on study location found a similar risk reduction of liver  
47  
48 cancer in the Western countries (RR 0.61, 0.48–0.76;  $I^2 = 64\%$ ,  $P = 0.007$ ) and in the  
49  
50 Asian countries (RR 0.56, 0.48–0.64;  $I^2 = 51\%$ ,  $P = 0.09$ ). (**Supplementary Figure 5**)  
51  
52  
53  
54  
55  
56  
57  
58  
59  
60

1  
2  
3  
4 Besides the overall RR estimates, some studies reported different RR estimate for  
5  
6 different pharmacokinetic and dosage of statin use (**Supplementary Table 2**). We  
7  
8 conducted further subgroup analyses based on these available data.  
9

10  
11 According to the different pharmacokinetic, statins can be classified as lipophilic  
12  
13 statins (Atorvastatin, Fluvastatin, Lovastatin, and Simvastatin) and hydrophilia statins  
14  
15 (Pravastatin and Rosuvastatin).<sup>21</sup> Subgroup analysis of lipophilic statins<sup>29 31 34-36</sup>  
16  
17 found a significant decrease of liver cancer risk (RR 0.57, 0.50–0.65;  $I^2 = 50\%$ ,  $P =$   
18  
19 0.08). And there was a similar result among users of hydrophilia statins<sup>31 35 36</sup> (RR  
20  
21 0.59, 0.41–0.84;  $I^2 = 50\%$ ,  $P = 0.13$ ) (**Supplementary Figure 6**).  
22  
23  
24

25  
26 Test for interaction showed non-significant results for subgroups with different  
27  
28 baseline risk, confounding adjustment, study location, or pharmacokinetic ( $P_{\text{interaction}} =$   
29  
30 0.08, 0.08, 0.54 and 0.86, respectively) (**Table 3**). Therefore, there is no strong  
31  
32 evidence to support a different preventive effect of statins on liver cancer in these  
33  
34 subgroups.  
35  
36

37  
38 Subgroup analysis of six studies with higher cumulative dose of statin use, defined as  
39  
40 statin use more than 180 cumulative defined daily dose (cDDD) or 0.5 years  
41  
42 (cumulative duration), showed a trend toward more risk reduction of liver cancer (RR  
43  
44 0.53, 0.36-0.79), but with a high degree of heterogeneity ( $I^2 = 90\%$ ,  $P < 0.00001$ )  
45  
46  
47  
48 (**Supplementary Figure 7**).  
49

## 50 51 Discussion

52  
53 This present meta-analysis represents the most comprehensive review to date on the  
54  
55 association between the statin use and the liver cancer risk, by including 12 studies  
56  
57  
58  
59  
60

1  
2  
3  
4 (one IPD analysis of 22 RCTs, 5 cohort studies, and 6 case-control studies) and  
5  
6 involving 5,640,313 participants with 35,756 liver cancer cases. Overall, we found  
7  
8 that statin use was associated with an over 40% risk reduction in liver cancer  
9  
10 compared with nonusers (RR 0.58, 95%CI 0.51–0.67). This result was in line with the  
11  
12 previous three meta-analyses: Singh *et al.* included 10 studies and suggested statin  
13  
14 users were less likely to develop HCC (OR 0.63, 95%CI 0.52–0.76),<sup>16</sup> Pradelli *et al.*  
15  
16 and Zhang *et al.* included 5 and 7 observational studies and found a summary RR of  
17  
18 0.58 (95%CI 0.46–0.74) and 0.61 (95%CI 0.49–0.76), respectively.<sup>40 41</sup>

19  
20 The IPD analysis of 22 RCTs showed there is no significant association between statin  
21  
22 use and risk of liver cancer. The significant risk reduction of liver cancer among all  
23  
24 statin users was seen primarily in the observational studies, and this preventive effect  
25  
26 was relatively convinced in the cohorts than in the case-controls. There were some  
27  
28 reasons to explain the different findings between RCTs and observational studies.  
29  
30

31  
32 First, the exposure period to statins might be shorter than the period to carcinogenesis  
33  
34 and the latency to diagnosis in the cohorts and the case-controls. The observational  
35  
36 studies defined statin use varying in dosage and duration, from patients who received  
37  
38  $\geq 1$  cDDD or  $>1$  Rx of statins to more than 0.5 years (**Table 1**). On the other hand, the  
39  
40 median period of statin use was 5.1 years in the RCTs. Although there was a trend  
41  
42 toward more risk reduction of liver cancer with higher cumulative dose of statin use,  
43  
44 this defect might still result in overestimating the cancer-preventive effect of statins in  
45  
46 the observational studies.  
47  
48

49  
50 Second, clinical studies demonstrated that higher serum total cholesterol  
51  
52  
53  
54  
55  
56  
57  
58  
59  
60

1  
2  
3  
4 concentration was associated with decreased risk of liver cancer (**Supplementary**  
5  
6 **Table 3**).<sup>42-44</sup> Meanwhile, there were inverse association between use of non-statin  
7  
8 lipid-lowering drugs and risk of the liver cancer.<sup>35 38</sup> Meanwhile, because of the  
9  
10 contraindication, statins might not prescribed to the patients with the chronic liver  
11  
12 disease, which is known as a risk factor of liver cancer. Unfortunately, the  
13  
14 observational studies included in this analysis seldom adopted these factors for  
15  
16 adjustment. Actually, subgroup analysis of studies with adequate adjustment showed a  
17  
18 trend toward less risk reduction, indicating the potential of overestimate this  
19  
20 preventive effect by confounders.

21  
22  
23  
24  
25  
26 Third, the RCTs included lower risk population (patients with cardiovascular disease  
27  
28 rather than HBV /HCV infection), might not be powerful enough to investigate the  
29  
30 liver cancer outcomes, which were much rarer than cardiovascular events. In addition,  
31  
32 subgroup analysis of studies with higher baseline risk showed a trend toward more  
33  
34 decrease of liver cancer risk.

35  
36  
37  
38  
39 These reasons suggested that the observed modulation of cancer incidence cannot be  
40  
41 ascribable to a direct statin-mediated effect,<sup>20</sup> the exposure period, the indication (e.g.  
42  
43 hyperlipidemia) and contraindication (e.g. chronic liver disease) of statins might  
44  
45 overestimate its cancer-preventive effect.

46  
47  
48  
49 We found similar results in Western countries and Asian countries, which were  
50  
51 different from the meta-analysis conducted by Singh *et al.* which concluded that the  
52  
53 inverse association of statins with HCC was stronger in the Asian population.  
54  
55 Considering four more studies we included, this difference might be caused by the  
56  
57  
58  
59  
60

1  
2  
3  
4 insufficient data in their meta-analysis. Based on the pharmacokinetics, it is plausible  
5  
6 that lipophilic and hydrophilic statins will differ in their liver cancer prevention  
7  
8 qualities.<sup>21 22</sup> However, subgroup analysis of lipophilic and hydrophilic statins showed  
9  
10 similar results.  
11

12  
13 Besides the limitations described previously, there were some other limitations should  
14  
15 be noted. First, a significant heterogeneity was observed in the present meta-analysis,  
16  
17 which might results from the difference in study design. Results of subgroup analyses  
18  
19 would also be limited by this heterogeneity. Second, the adherence to statin therapy is  
20  
21 known to be associated with healthy lifestyle, which might affect the cancer  
22  
23 outcome.<sup>45</sup> Such information is hard to be captured in databases or medical record in  
24  
25 the observational studies.<sup>46</sup> Third, five observational studies were conducted using the  
26  
27 Taiwanese National Health Insurance Research Database (NHIRD),<sup>31 32 35-37</sup> although  
28  
29 they were not in the same period, these studies might contain overlapping groups of  
30  
31 patients. These limitations mentioned above might lead to confounding of overall  
32  
33 results from the present study, and should be considered in future studies aiming at  
34  
35 confirming the protective effects of statins on human cancer risk.  
36  
37  
38  
39  
40  
41  
42

43 The strengths of our meta-analysis were as follows: First, we performed a much more  
44  
45 comprehensive search and more subgroup analyses, compared with the previous  
46  
47 meta-analyses; Second, the methodological quality of the included studies were  
48  
49 reasonable good; Third, publication bias, which due to the tendency of not publishing  
50  
51 small studies with null results, were not found in our meta-analysis.  
52  
53  
54

55  
56 Of note, preclinical studies have indicated that statins possess synergism with other  
57  
58  
59  
60

1  
2  
3  
4 therapeutic agents *in vitro* and *in vivo* for liver cancer.<sup>47 48</sup> Some clinical studies have  
5  
6 also demonstrated that statins would prolong survival in patients with advanced liver  
7  
8 cancer (**Supplementary Table 4**),<sup>49-52</sup> and associated with risk reduction of  
9  
10 recurrence after curative surgery in patients of HBV related HCC.<sup>53</sup> Therefore,  
11  
12 considerable interest exists in adjunctive therapy with statins for liver cancer. In fact,  
13  
14 there were some RCTs ongoing to determine the effectiveness of pravastatin, when  
15  
16 used in combination with sorafenib, in the treatment of liver cancer (**Supplementary**  
17  
18 **Table 5**).

19  
20  
21  
22  
23  
24 Currently, physicians are less likely to prescribe statins for patients with chronic liver  
25  
26 disease, based on the concerns about the statin-induced liver injury.<sup>31</sup> However, there  
27  
28 were number of studies have demonstrated the safe use, even salutary effects.<sup>54-56</sup>  
29  
30  
31 Meanwhile, the risk of serious statin-related liver injury appears to be no greater than  
32  
33 the background incidence of this rare event.<sup>57</sup> Therefore, considering their benefits for  
34  
35 cardiovascular event prevention and the potential effect in liver cancer prevention and  
36  
37 treatment, statins should not be denied to these patients.  
38  
39

40  
41 In conclusion, our results suggest that statin use is associated with a significant risk  
42  
43 reduction of liver cancer, when taken daily for cardiovascular event prevention.  
44  
45 However, this preventive effect might be overestimated due to the exposure period,  
46  
47 indication and contraindication of statins, and other confounders. Statins might be  
48  
49 considered as an adjuvant in the treatment of liver cancer.  
50  
51  
52

#### 53 54 55 **ACKNOWLEDGEMENT**

56  
57 We thank Medjaden Bioscience Limited and Gui Lv for assisting in the preparation  
58  
59  
60



1  
2  
3 and revision of this manuscript.  
4  
5  
6

### 7 **CONTRIBUTORSHIP STATEMENT**

8  
9 XB Cui had the original idea, M Shi, XB Cui and W Gong worked together to  
10 develop an appropriate theoretical framework and design. XB Cui developed the  
11 search, M Shi and XB Cui were involved in the selection process. M Shi and XB Cui  
12 extracted relevant data, XB Cui and W Gong performed the statistical analysis and all  
13 authors were involved in the data interpretation. M Shi and B Nie wrote the  
14 manuscript draft and revised the draft based on input from the other authors. All  
15 authors revised it critically for content and approved the final version.  
16  
17  
18  
19  
20  
21  
22  
23  
24  
25

### 26 **COMPETING INTERESTS**

27  
28 There are no competing interests  
29  
30  
31

### 32 **FUNDING**

33  
34 None.  
35  
36

### 37 **DATA SHARING**

38  
39 No additional data available.  
40  
41  
42  
43

### 44 **REFERENCES:**

- 45  
46 1. Baigent C, Keech A, Kearney PM, *et al.* Efficacy and safety of cholesterol-lowering treatment:  
47 prospective meta-analysis of data from 90,056 participants in 14 randomised trials of statins.  
48 *Lancet* 2005;**366**(9493):1267-78.  
49  
50 2. Newman TB, Hulley SB. Carcinogenicity of lipid-lowering drugs. *JAMA* 1996;**275**(1):55-60.  
51  
52 3. Demierre MF, Higgins PD, Gruber SB, *et al.* Statins and cancer prevention. *Nat Rev Cancer*  
53 2005;**5**(12):930-42.  
54  
55 4. Zeichner S, Mihos CG, Santana O. The pleiotropic effects and therapeutic potential of the  
56 hydroxy-methyl-glutaryl-CoA reductase inhibitors in malignancies: A comprehensive review. *J*  
57 *Cancer Res Ther* 2012;**8**(2):176-83.  
58  
59 5. Lonardo A, Loria P. Potential for statins in the chemoprevention and management of hepatocellular  
60

- carcinoma. *J Gastroenterol Hepatol* 2012;**27**(11):1654-64.
6. Shimoyama S. Statins are logical candidates for overcoming limitations of targeting therapies on malignancy: their potential application to gastrointestinal cancers. *Cancer Chemother Pharmacol* 2011;**67**(4):729-39.
  7. Dale KM, Coleman CI, Henyan NN, *et al.* Statins and cancer risk: a meta-analysis. *JAMA* 2006;**295**(1):74-80.
  8. Browning DRL, Martin RM. Statins and risk of cancer: A systematic review and metaanalysis. *Int J Cancer* 2007;**120**(4):833-43.
  9. Kuoppala J, Lamminpaa A, Pukkala E. Statins and cancer: A systematic review and meta-analysis. *Eur J Cancer* 2008;**44**(15):2122-32.
  10. Baigent C, Blackwell L, Emberson J, *et al.* Efficacy and safety of more intensive lowering of LDL cholesterol: a meta-analysis of data from 170,000 participants in 26 randomised trials. *Lancet* 2010;**376**(9753):1670-81.
  11. Undela K, Srikanth V, Bansal D. Statin use and risk of breast cancer: a meta-analysis of observational studies. *Breast Cancer Res Treat* 2012;**135**(1):261-9.
  12. Shimoyama S. Statins and gastric cancer risk. *Hepatogastroenterology* 2011;**58**(107-108):1057-61.
  13. Cui X, Xie Y, Chen M, *et al.* Statin use and risk of pancreatic cancer: a meta-analysis. *Cancer Causes Control* 2012;**23**(7):1099-111.
  14. Bansal D, Undela K, D'Cruz S, *et al.* Statin Use and Risk of Prostate Cancer: A Meta-Analysis of Observational Studies. *PLoS One* 2012;**7**(10):e46691.
  15. Bardou M, Barkun A, Martel M. Effect of statin therapy on colorectal cancer. *Gut* 2010;**59**(11):1572-85.
  16. Singh S, Singh PP, Singh AG, *et al.* Statins Are Associated With a Reduced Risk of Hepatocellular Cancer: A Systematic Review and Meta-analysis. *Gastroenterology* 2013;**144**(2):323-32.
  17. Stein EA, Corsini A, Gimpelewicz CR, *et al.* Fluvastatin treatment is not associated with an increased incidence of cancer. *Int J Clin Pract* 2006;**60**(9):1028-34.
  18. Matsushita Y, Sugihara M, Kaburagi J, *et al.* Pravastatin use and cancer risk: a meta-analysis of individual patient data from long-term prospective controlled trials in Japan. *Pharmacoepidemiol Drug Saf* 2010;**19**(2):196-202.
  19. Emberson JR, Kearney PM, Blackwell L, *et al.* Lack of effect of lowering LDL cholesterol on cancer: meta-analysis of individual data from 175,000 people in 27 randomised trials of statin therapy. *PLoS One* 2012;**7**(1):e29849.
  20. Gazerro P, Bifulco M. Statins and Cancer in Gastroenterology: New Insight? *Gastroenterology* 2013;**144**(7):1572-3.
  21. Gazerro P, Proto MC, Gangemi G, *et al.* Pharmacological actions of statins: a critical appraisal in the management of cancer. *Pharmacol Rev* 2012;**64**(1):102-46.
  22. Gronich N, Rennert G. Beyond aspirin - Cancer prevention with statins, metformin and bisphosphonates. *Nat Rev Clin Oncol* 2013;**10**(11):625-42.
  23. Moher D, Liberati A, Tetzlaff J, *et al.* Preferred reporting items for systematic reviews and meta-analyses: the PRISMA statement. *BMJ* 2009;**339**:b2535.
  24. GA Wells, B Shea, D O'Connell, *et al.* The Newcastle-Ottawa Scale (NOS) for assessing the quality of nonrandomised studies in meta-analyses. [http://www.ohri.ca/programs/clinical\\_epidemiology/oxford.asp](http://www.ohri.ca/programs/clinical_epidemiology/oxford.asp).
  25. Higgins JP, Thompson SG, Deeks JJ, *et al.* Measuring inconsistency in meta-analyses. *BMJ*

- 2003;**327**(7414):557-60.
26. METABIAS: Stata module to test for small-study effects in meta-analysis [program], 2009.
27. Altman DG, Bland JM. Interaction revisited: the difference between two estimates. *BMJ* 2003;**326**(7382):219.
28. Friis S, Poulsen AH, Johnsen SP, *et al.* Cancer risk among statin users: A population-based cohort study. *Int J Cancer* 2005;**114**(4):643-7.
29. Friedman GD, Flick ED, Udaltsova N, *et al.* Screening statins for possible carcinogenic risk: up to 9 years of follow-up of 361,859 recipients. *Pharmacoepidemiol Drug Saf* 2008;**17**(1):27-36.
30. Marelli C, Gunnarsson C, Ross S, *et al.* Statins and Risk of Cancer A Retrospective Cohort Analysis of 45,857 Matched Pairs From an Electronic Medical Records Database of 11 Million Adult Americans. *J Am Coll Cardiol* 2011;**58**(5):530-7.
31. Tsan YT, Lee CH, Wang JD, *et al.* Statins and the risk of hepatocellular carcinoma in patients with hepatitis B virus infection. *J Clin Oncol* 2012;**30**(6):623-30.
32. Tsan YT, Lee CH, Ho WC, *et al.* Statins and the risk of hepatocellular carcinoma in patients with hepatitis C virus infection. *J Clin Oncol* 2013;**31**(12):1514-21.
33. Khurana V, Saluja A, Caldito G, *et al.* Statins are protective against hepatocellular cancer in patients with hepatitis C virus infection: Half a million US veterans' study. *Gastroenterology* 2005;**128**(4, Suppl. 2):A714.
34. El-Serag HB, Johnson ML, Hachem C, *et al.* Statins are associated with a reduced risk of hepatocellular carcinoma in a large cohort of patients with diabetes. *Gastroenterology* 2009;**136**(5):1601-8.
35. Chiu HF, Ho SC, Chen CC, *et al.* Statin use and the risk of liver cancer: a population-based case-control study. *Am J Gastroenterol* 2011;**106**(5):894-8.
36. Lai SW, Liao KF, Lai HC, *et al.* Statin use and risk of hepatocellular carcinoma. *Eur J Epidemiol* 2013;**28**(6):485-92.
37. Leung HW, Chan AL, Lo D, *et al.* Common cancer risk and statins: a population-based case-control study in a Chinese population. *Expert Opin Drug Saf* 2013;**12**(1):19-27.
38. Chaiteerakij R, Yang JD, Harmsen WS, *et al.* Risk factors for intrahepatic cholangiocarcinoma: association between metformin use and reduced cancer risk. *Hepatology* 2013;**57**(2):648-55.
39. Singh S, Singh PP, Roberts LR, *et al.* Chemopreventive strategies in hepatocellular carcinoma. *Nat Rev Gastroenterol Hepatol* 2014;**11**(1):45-54.
40. Pradelli D, Soranna D, Scotti L, *et al.* Statins and primary liver cancer: a meta-analysis of observational studies. *Eur J Cancer Prev* 2013;**22**(3):229-34.
41. Zhang H, Gao C, Fang L, *et al.* Statin use and risk of liver cancer: A meta-analysis of 7 studies involving more than 4.7 million patients. *World J Meta-Anal* 2013;**1**(3):130-7.
42. Ahn J, Lim U, Weinstein SJ, *et al.* Prediagnostic total and high-density lipoprotein cholesterol and risk of cancer. *Cancer Epidemiol Biomarkers Prev* 2009;**18**(11):2814-21.
43. Iso H, Ikeda A, Inoue M, *et al.* Serum cholesterol levels in relation to the incidence of cancer: the JPHC study cohorts. *Int J Cancer* 2009;**125**(11):2679-86.
44. Kitahara CM, de Gonzalez AB, Freedman ND, *et al.* Total Cholesterol and Cancer Risk in a Large Prospective Study in Korea. *J Clin Oncol* 2011;**29**(12):1592-8.
45. Brookhart MA, Patrick AR, Dormuth C, *et al.* Adherence to lipid-lowering therapy and the use of preventive health services: an investigation of the healthy user effect. *Am J Epidemiol* 2007;**166**(3):348-54.

- 1  
2  
3 46. Boudreau DM, Yu O, Johnson J. Statin use and cancer risk: a comprehensive review. *Expert Opin*  
4 *Drug Saf* 2010;**9**(4):603-21.
- 5  
6 47. Kim W, Yoon JH, Kim JR, *et al.* Synergistic anti-tumor efficacy of lovastatin and protein kinase  
7 C-beta inhibitor in hepatocellular carcinoma. *Cancer Chemother Pharmacol*  
8 2009;**64**(3):497-507.
- 9  
10 48. Polo MP, Crespo R, de Bravo MG. Geraniol and simvastatin show a synergistic effect on a human  
11 hepatocarcinoma cell line. *Cell Biochem Funct* 2011;**29**(6):452-8.
- 12  
13 49. Kawata S, Yamasaki E, Nagase T, *et al.* Effect of pravastatin on survival in patients with advanced  
14 hepatocellular carcinoma. A randomized controlled trial. *Br J Cancer* 2001;**84**(7):886-91.
- 15  
16 50. Lersch C, Schmelz R, Erdmann J, *et al.* Treatment of HCC with pravastatin, octreotide, or  
17 gemcitabine - A critical evaluation. *Hepatogastroenterology* 2004;**51**(58):1099-103.
- 18  
19 51. Graf H, Jungst C, Straub G, *et al.* Chemoembolization combined with pravastatin improves survival  
20 in patients with hepatocellular carcinoma. *Digestion* 2008;**78**(1):34-8.
- 21  
22 52. Georgescu EF, Badulescu F, Dumitrescu D, *et al.* Lovastatin may enhance cytostatic effects of  
23 sorafenib in hepatic carcinoma. Primary results of a pilot study. *Hepatol Int* 2011;**5**(1):423.
- 24  
25 53. Wu CY, Chen YJ, Ho HJ, *et al.* Association between nucleoside analogues and risk of hepatitis B  
26 virus-related hepatocellular carcinoma recurrence following liver resection. *JAMA*  
27 2012;**308**(18):1906-14.
- 28  
29 54. Lewis JH, Mortensen ME, Zweig S, *et al.* Efficacy and safety of high-dose pravastatin in  
30 hypercholesterolemic patients with well-compensated chronic liver disease: Results of a  
31 prospective, randomized, double-blind, placebo-controlled, multicenter trial. *Hepatology*  
32 2007;**46**(5):1453-63.
- 33  
34 55. Nelson A, Torres DM, Morgan AE, *et al.* A pilot study using simvastatin in the treatment of  
35 nonalcoholic steatohepatitis: A randomized placebo-controlled trial. *J Clin Gastroenterol*  
36 2009;**43**(10):990-4.
- 37  
38 56. Lewis JH. Clinical Perspective: Statins and the Liver-Harmful or Helpful? *Dig Dis Sci*  
39 2012;**57**(7):1754-63.
- 40  
41 57. Bader T. The myth of statin-induced hepatotoxicity. *Am J Gastroenterol* 2010;**105**(5):978-80.

#### Figure legends:

42  
43  
44 **Figure 1.** Flow chart of study selection in the present meta-analysis.

45  
46  
47 **Figure 2.** Overall meta-analysis of the statin use and the liver cancer risk.

48  
49 **Supplementary Figure 1.** Influence analysis.

50  
51  
52 **Supplementary Figure 2.** Subgroup analyses based on study design.

53  
54  
55 **Supplementary Figure 3.** Subgroup analyses based on baseline risk of liver cancer.

56  
57  
58 **Supplementary Figure 4.** Subgroup analyses based on confounder adjustment.

1  
2  
3  
4  
5  
6  
7  
8  
9  
10  
11  
12  
13  
14  
15  
16  
17  
18  
19  
20  
21  
22  
23  
24  
25  
26  
27  
28  
29  
30  
31  
32  
33  
34  
35  
36  
37  
38  
39  
40  
41  
42  
43  
44  
45  
46  
47  
48  
49  
50  
51  
52  
53  
54  
55  
56  
57  
58  
59  
60

**Supplementary Figure 5.** Subgroup analyses based on study location.

**Supplementary Figure 6.** Subgroup analyses based on pharmacokinetic of statins.

**Supplementary Figure 7.** Subgroup analysis of higher cumulative dose of statin use.

For peer review only

**Table 1.** Study characteristics

| Studies                                  | Study design | Patient population                                                      | Study period | Cases defined | Follow-up      | Statins type         | Dosage/Duration of Statin use |
|------------------------------------------|--------------|-------------------------------------------------------------------------|--------------|---------------|----------------|----------------------|-------------------------------|
| Emberson, 2012, UK <sup>19</sup>         | RCT          | IPD analysis of 22 RCTs                                                 | -            | ICD-9 155     | 5.1 years (Me) | A, F, L, P, R, S     | 5.1 years (Me)                |
| Friis, 2005, North Jutland <sup>28</sup> | Cohort       | General population (CPR)                                                | 1989-2002    | ICD-10 C22    | 3.3 years (M)  | Unspecified          | ≥2 Rx                         |
| Friedman, 2008, USA <sup>29</sup>        | Cohort       | General population (KPMCP)                                              | 1994-2003    | ICD-9-CM 155  | > 2 years      | A, L, S (97.6%)      | ≥1 Rx                         |
| Marelli, 2011, USA <sup>30</sup>         | Cohort       | General older population (men ≥ 45 and women ≥ 55 years; GE Centricity) | 1990-2009    | ICD-9 155     | 4.6 years (M)  | Unspecified          | ≥1 cDDD                       |
| Tsan, 2012, Taiwan <sup>31</sup>         | Cohort       | Patients with HBV infection (NHIRD)                                     | 1997-2008    | ICD-9 155     | 9.9 years (M)  | A, F, L, P, R, and S | ≥28 cDDDs                     |
| Tsan, 2013, Taiwan <sup>32</sup>         | Cohort       | Patients with HCV infection (NHIRD)                                     | 1999-2010    | ICD-9 155     | 10.7 years (M) | A, F, L, P, R, and S | ≥28 cDDDs                     |
| Khurana, 2005, USA <sup>33</sup>         | Case control | General population (VISN)                                               | 1997-2002    | ICD-9 155     | NR             | Unspecified          | ≥1 Rx                         |
| El-Serag, 2009, USA <sup>34</sup>        | Case control | Diabetes patients (VA)                                                  | 1997-2002    | ICD-9-CM 155  | 2.4 years (M)  | A, C, F, L, P, and S | 1.6 years (M)                 |
| Chiu, 2011, Taiwan <sup>35</sup>         | Case control | Older patients (≥ 50 years; NHIRD)                                      | 2005–2008    | ICD-9-CM 155  | NR             | A, F, L, P, R, and S | ≥ 1 cDDD                      |
| Lai, 2013, Taiwan <sup>36</sup>          | Case control | General population (NHIRD)                                              | 2000-2009    | ICD-9-CM 155  | 1.4 years (M)  | A, F, L, P, R, and S | ≥1 Rx                         |
| Leung, 2013, Taiwan <sup>37</sup>        | Case control | General population (NHIRD)                                              | 2000-2008    | ICD-9-CM 155  | 4.1 years (M)  | Unspecified          | > 0.5 years                   |
| Chaiteerakij, 2013, USA <sup>38</sup>    | Case control | Hyperlipidemia patients (Mayo Clinic)                                   | 2000-2010    | ICD-9-CM 155  | >1 years       | Unspecified          | ≥1 Rx                         |

Patients population: IPD = Individual patient data, RCT = randomized controlled trials, CPR = the Central Population Register of Danish citizens, KPMCP = the Kaiser Permanente Medical Care Program in northern California, GE Centricity = the General Electric Centricity database, NHIRD = the Taiwanese National Health Insurance research database, VISN = Veterans Integrated Service Networks 16 Veteran Affairs database, VA = Veterans Affairs national databases, Mayo Clinic = Mayo Clinic (Rochester, MN), HBV = hepatitis B virus; Cases defined: ICD-9 or -10 = International Classification of Diseases, Ninth Revision or Tenth Revision, CM = Clinical Modification; Duration of follow-up: When the follow-up periods of statin user and nonuser were different, only the shorter one was showed, and all periods were transformed to years; Statin type: A = Atorvastatin, C = Cerivastatin, F = Fluvastatin, L = Lovastatin, P = Pravastatin, R = Rosuvastatin, S = Simvastatin, Non-statin = Non-statin cholesterol-lowering drug(s) only; Duration of statin use: M = Mean, Me = Median, ≥1 cDDD = more than 1 cumulative defined daily dose before the diagnosis of liver cancer, Rx = prescriptions.

1  
2  
3  
4  
5  
6  
7  
8  
9  
10  
11  
12  
13  
14  
15  
16  
17  
18  
19  
20  
21  
22  
23  
24  
25  
26  
27  
28  
29  
30  
31  
32  
33  
34  
35  
36  
37  
38  
39  
40  
41  
42  
43  
44  
45  
46  
47  
48  
49

Table 2. Study data

| Studies                                   | Intervention/ Cases           |              | Control                       |              | Measurements of effect estimates | Crude RR with 95% CIs | Adjusted RR with 95% CIs | Confounders for adjustment      |
|-------------------------------------------|-------------------------------|--------------|-------------------------------|--------------|----------------------------------|-----------------------|--------------------------|---------------------------------|
|                                           | No. of event/ No. of exposure | No. of total | No. of event/ No. of exposure | No. of total |                                  |                       |                          |                                 |
| Emberson, 2012, UK <sup>19</sup>          | 35                            | 67258        | 33                            | 67279        | RR                               | 1.06 (0.66, 1.71)*    | 1.06 (0.66, 1.71)*       | Randomization                   |
| Friis, 2005, North Jutland <sup>28</sup>  | 1                             | 12251        | 166                           | 334754       | OR                               | NA                    | 1.16 (0.46-2.90)         | 1,2, 16, 21, 23                 |
| Friedman(Male), 2008, USA <sup>29</sup>   | 32                            | 192598       | NA                            | 1904876      | HR                               | NA                    | 0.49 (0.34-0.70)         | 16                              |
| Friedman(Female), 2008, USA <sup>29</sup> | 10                            | 169261       | NA                            | 1976332      | HR                               | NA                    | 0.40 (0.21-0.75)         |                                 |
| Marelli, 2011, USA <sup>30</sup>          | 13                            | 45857        | 24                            | 45857        | RR                               | 0.31 (0.14-0.68)*     | 0.31 (0.14-0.68)*        | 1-5, 14, 16-18, 26, 27          |
| Tsan, 2012, Taiwan <sup>31</sup>          | 58                            | 2785         | 963                           | 30628        | HR                               | 0.66 (0.51- 0.86)     | 0.47 (0.36-0.61)         | 1, 2, 7, 8, 11, 12              |
| Tsan, 2013, Taiwan <sup>32</sup>          | 1378                          | 35023        | 26505                         | 225841       | HR                               | 0.42 (0.39-0.46)      | 0.53 (0.49-0.58)         | 1, 2, 7, 8, 11, 13              |
| Khurana, 2005, USA <sup>33</sup>          | NA                            | NA           | NA                            | NA           | OR                               | NA                    | 0.52 (0.41- 0.67)        | 1, 11, 13                       |
| El-Serag, 2009, USA <sup>34</sup>         | 447                           | 1303         | 2766                          | 5212         | OR                               | 0.46 (0.40-0.52)      | 0.74 (0.64-0.87)         | 1-3, 6, 8, 9, 11-13, 21, 24, 28 |
| Chiu, 2011, Taiwan <sup>35</sup>          | 117                           | 1166         | 195                           | 1166         | OR                               | 0.53 (0.41-0.69)      | 0.62 (0.45-0.83)         | 1, 2, 8, 9, 11, 12, 20, 29      |
| Lai, 2013, Taiwan <sup>36</sup>           | 255                           | 3480         | 1635                          | 13920        | OR                               | 0.61 (0.52-0.72)      | 0.71 (0.56-0.89)         | 1, 2, 8-13, 22, 24, 25          |
| Leung, 2013, Taiwan <sup>37</sup>         | 26                            | 424          | 6851                          | 33781        | HR                               | 0.45 (0.30-0.67)      | 0.44 (0.28, 0.72)        | 1, 2, 11, 15, 20, 21, 23        |
| Chaiteerakij, 2013, USA <sup>38</sup>     | 72                            | 165          | 165                           | 256          | OR                               | NA                    | 0.6 (0.4-0.9)            | 1-3, 8, 11, 17, 22, 28, 30      |

The RR with an asterisk mark (\*) was calculated based on the raw data. The others, crude or adjusted, were extracted from the original paper; Confounders for adjustment: 1 = age, 2 = sex, 3 = race, 4 = BMI, 5 = smoking status, 6 = ethanol intake, 7 = socioeconomic status, 8 = cirrhosis, 9 = alcoholic liver disease, 10 = non-alcoholic fatty liver disease, 11 = diabetes mellitus, 12 = HBV infection, 13 = HCV infection, 14 = concomitant diagnoses (unspecified), 15 = Charlson score, 16 = calendar year, 17 = cholesterol (totalcholesterol, VLDL, LDL, or triglycerides), 18 = prostate-specific antigen, 19 = resection extent, 20 = other lipid-lowering agents, 21 = cardiovascular medications (aspirin, nonsteroidal anti-inflammatory medications, or angiotensin-converting enzymes inhibitors), 22 = metformin or thiazolidinedione, 23 = hormone-replacement therapy, 24 = HCV treatment, 25 = HBV treatment, 26 = medications taken (unspecified), 27 = the number of office visits, 28 = propensity to use statins, 29 = hospital stay, 30 = biliary tract diseases

Table 3. Subgroup analyses of included studies

| Subgroup                           | No. of studies (reports) | Summary RR ( 95% CIs) | Heterogeneity, I <sup>2</sup> | Heterogeneity, P value | P <sub>interaction</sub> |          |
|------------------------------------|--------------------------|-----------------------|-------------------------------|------------------------|--------------------------|----------|
| Study design                       | RCT                      | 1                     | 1.06 (0.66-1.71)              | -                      | -                        | P = 0.01 |
|                                    | Observational studies    | 11(12)                | 0.57(0.50-0.64)               | 61%                    | P = 0.003                |          |
| Observational studies              | Cohort studies           | 5 (6)                 | 0.51 (0.44–0.58)              | 18%                    | P = 0.30                 | P = 0.04 |
|                                    | Case-control studies     | 6                     | 0.63 (0.54–0.73)              | 46%                    | P = 0.10                 |          |
| Baseline risk of liver cancer      | Higher baseline risk     | 4                     | 0.52 (0.47-0.59)              | 16%                    | P = 0.31                 | P = 0.08 |
|                                    | General population       | 8 (9)                 | 0.63 (0.52–0.75)              | 59%                    | P = 0.01                 |          |
| Confounding adjustment             | Adequate adjustment      | 6                     | 0.64(0.53-0.77)               | 81%                    | P = 0.0001               | P = 0.08 |
|                                    | Inadequate adjustment    | 6 (7)                 | 0.51 (0.43-0.60)              | 3%                     | P = 0.40                 |          |
| Study location                     | Western studies          | 7 (8)                 | 0.61 (0.48-0.76)              | 64%                    | P = 0.007                | P = 0.54 |
|                                    | Asian studies            | 5                     | 0.56 (0.48-0.64)              | 51%                    | P = 0.09                 |          |
| Pharmacokinetic                    | Hipophilic statins       | 5 (6)                 | 0.57 (0.50-0.65)              | 50%                    | P = 0.08                 | P = 0.86 |
|                                    | Hydrophilia statins      | 3                     | 0.59(0.41–0.84)               | 50%                    | P = 0.13                 |          |
| Higher cumulative dosage of statin |                          | 6                     | 0.53 (0.36-0.79)              | 90%                    | P<0.0001                 | -        |

RR = relative risk; higher baseline risk of liver cancer: patients with older age, HBV or HCV infection. Adequate adjustment: RCT or studies which adjusted for at least 4 of 7 important confounders, such as HBV infection, HCV infection, cirrhosis, alcoholic liver disease, NAFLD, HBV treatment, or HCV treatment; Lipophilic statins: Atorvastatin, Fluvastatin, Lovastatin, or Simvastatin; Hydrophilia statins: Pravastatin or Rosuvastatin; Higher cumulative dosage of statin use: > 180cumulative defined daily dose or Duration of statin use > 0.5 years before the diagnosis of liver cancer.



1  
2  
3  
4  
5  
6  
7  
8  
9  
10  
11  
12  
13  
14  
15  
16  
17  
18  
19  
20  
21  
22  
23  
24  
25  
26  
27  
28  
29  
30  
31  
32  
33  
34  
35  
36  
37  
38  
39  
40  
41  
42  
43  
44  
45  
46  
47  
48  
49  
50  
51  
52  
53  
54  
55  
56  
57  
58  
59  
60

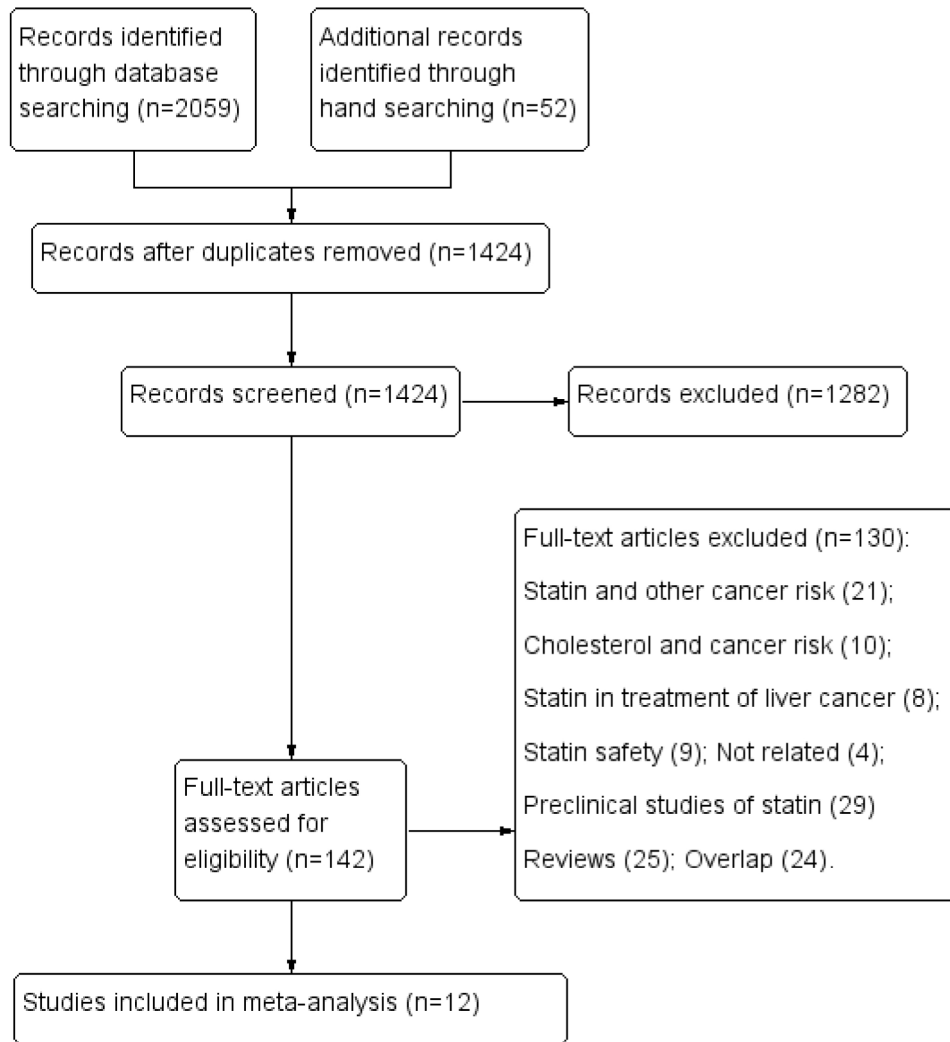

Flow chart of study selection in the present meta-analysis.  
207x224mm (300 x 300 DPI)





Overall meta-analysis of the statin use and the liver cancer risk.  
128x80mm (300 x 300 DPI)

Review only

SUPPLEMENTARY FIGURES:

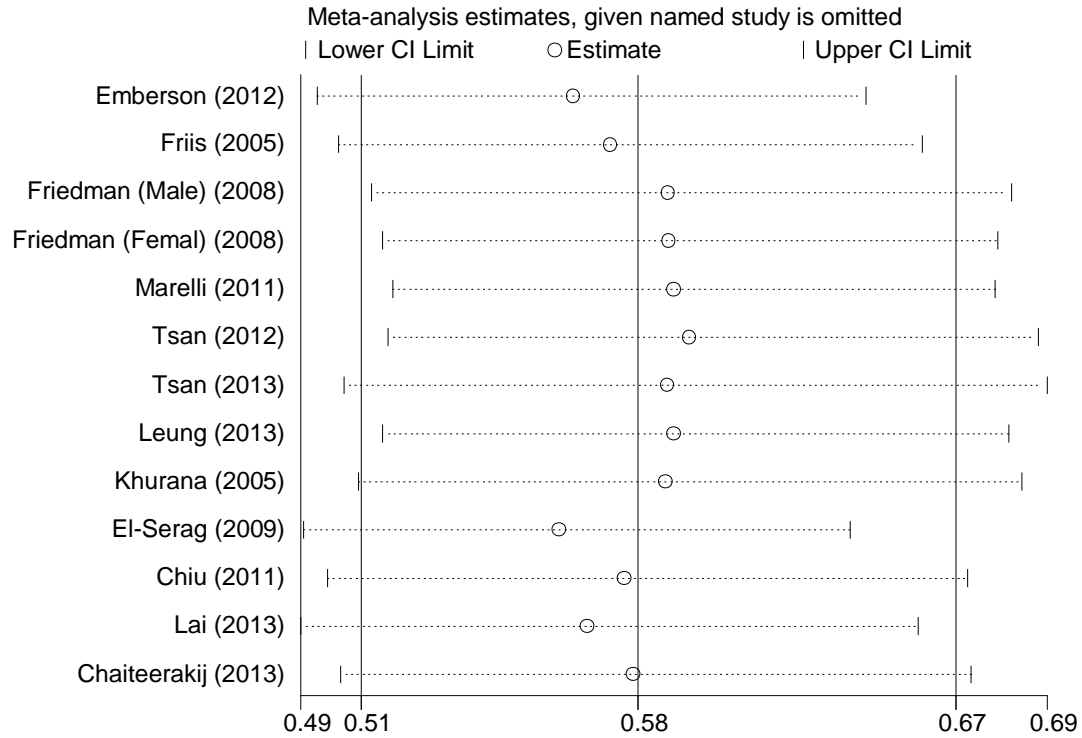

Supplementary Figure 1. Influence analysis.

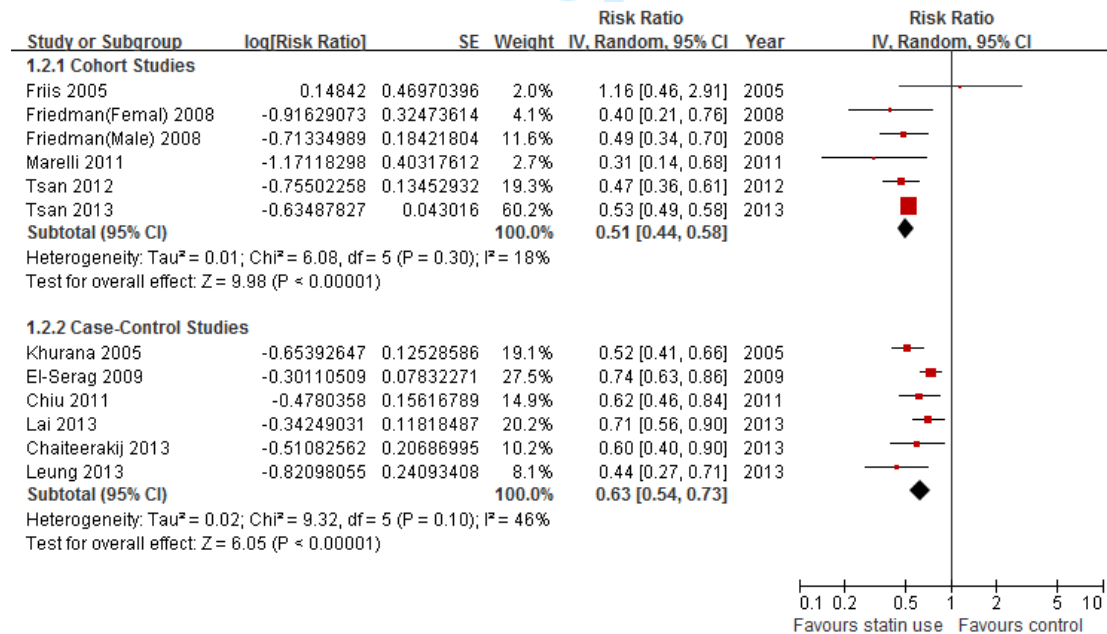

Supplementary Figure 2. Subgroup analyses based on study design.

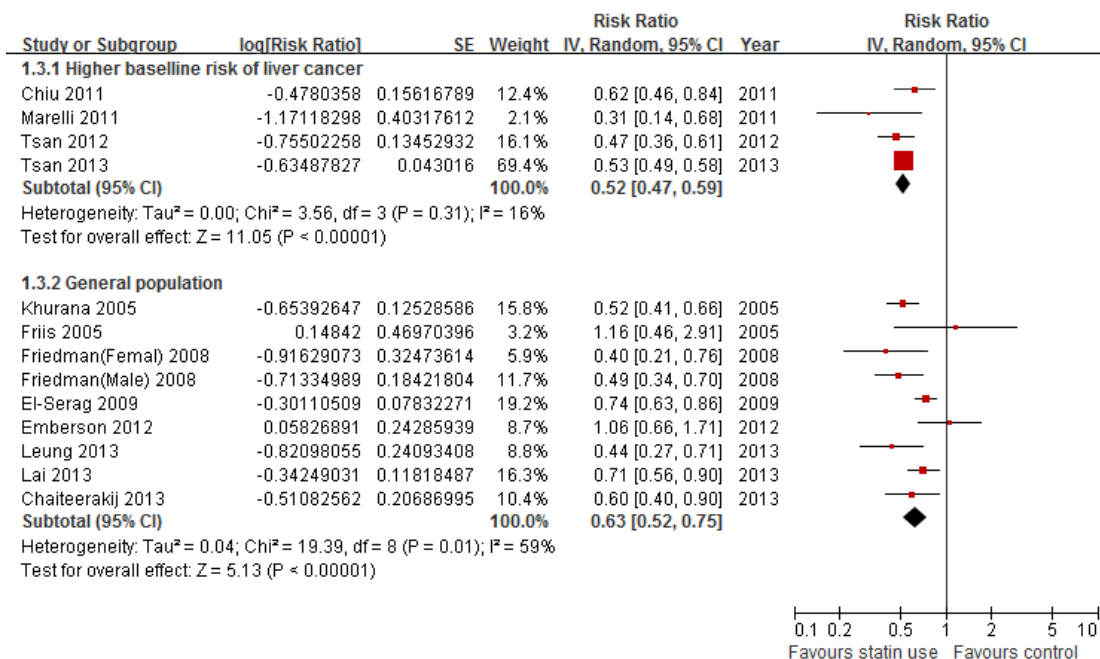

Supplementary Figure 3. Subgroup analyses based on baseline risk of liver cancer.

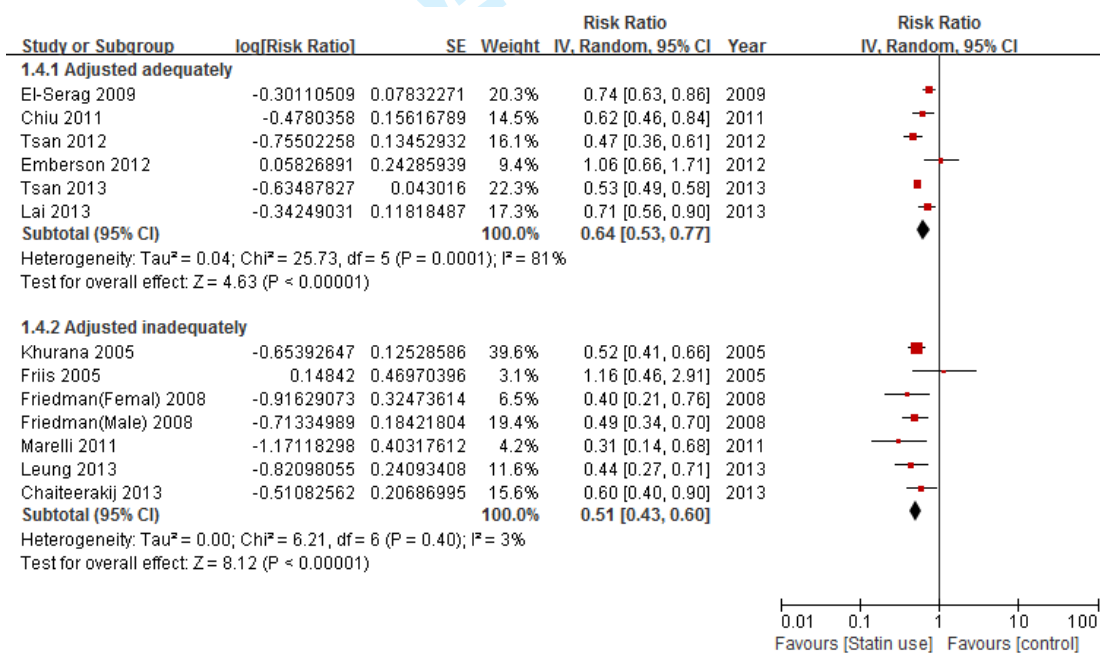

Supplementary Figure 4. Subgroup analyses based on confounder adjustment.

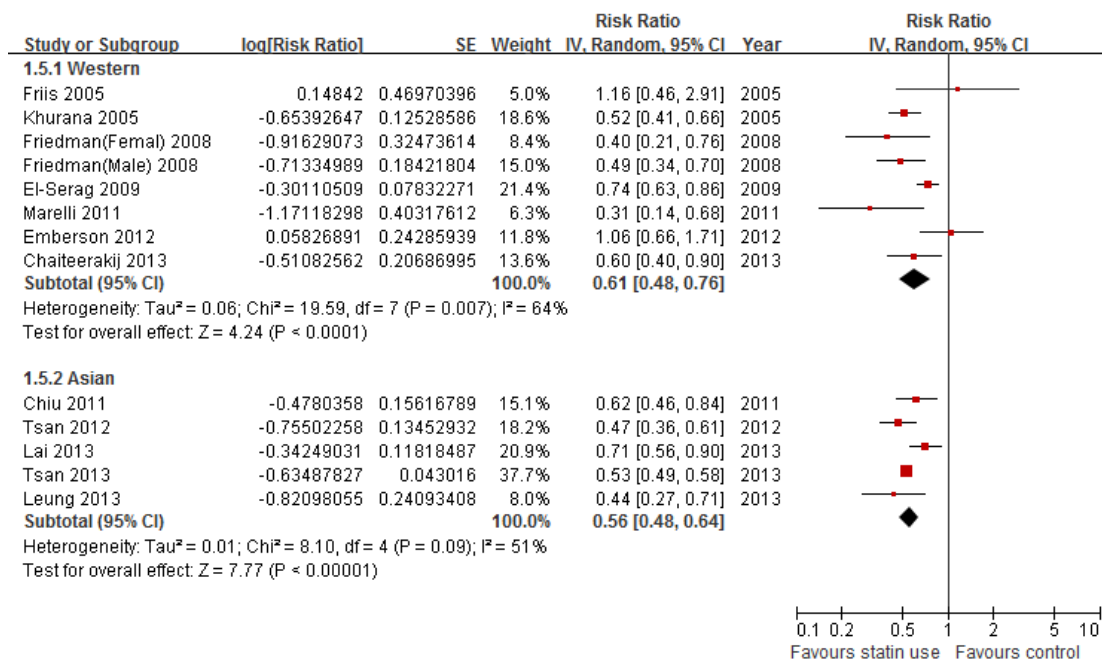

Supplementary Figure 5. Subgroup analyses based on study location.

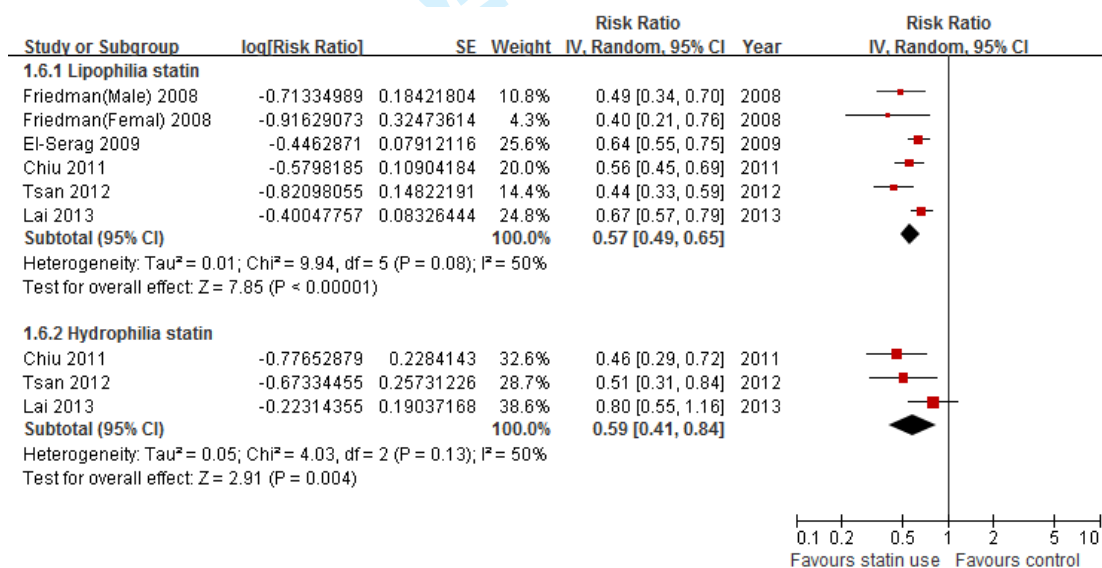

Supplementary Figure 6. Subgroup analyses based on pharmacokinetic of statins.

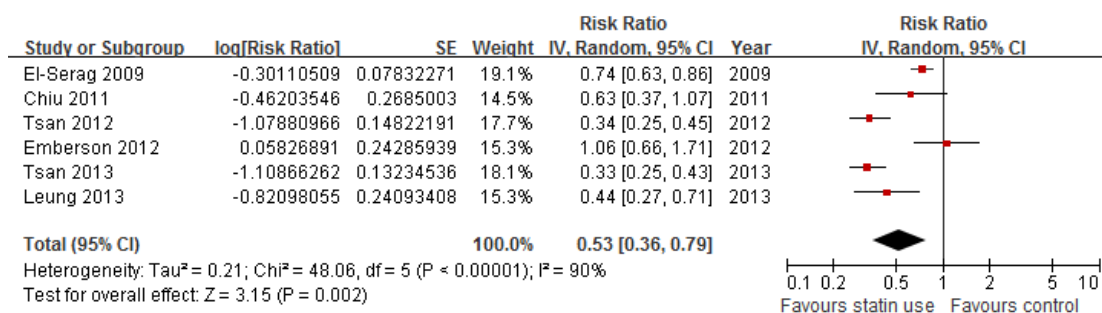

Supplementary Figure 7. Subgroup analysis of higher cumulative dose of statin use.

## SUPPLEMENTARY TABLES:

Supplementary Table 1. Assessment of methodological quality of the cohort and case-control studies according to the Newcastle–Ottawa Scale

| Cohort Studies               | Selection                                |                                     |                           | Comparability                        |                              |                       | Outcome               |                       | Total Score |
|------------------------------|------------------------------------------|-------------------------------------|---------------------------|--------------------------------------|------------------------------|-----------------------|-----------------------|-----------------------|-------------|
|                              | Representativeness of the exposed cohort | Selection of the non-exposed cohort | Ascertainment of exposure | Outcome of present at start of study | Control for important factor | Assessment of outcome | Follow-up long enough | Adequacy of follow up |             |
| Friis, 2005 <sup>28</sup>    | ☆                                        | ☆                                   | ☆                         | ☆                                    | ☆                            | ☆                     | -                     | ☆                     | 7           |
| Friedman, 2008 <sup>29</sup> | ☆                                        | ☆                                   | ☆                         | ☆                                    | ☆                            | ☆                     | -                     | ☆                     | 7           |
| Marelli, 2011 <sup>30</sup>  | ☆                                        | ☆                                   | ☆                         | ☆                                    | ☆                            | ☆                     | ☆                     | ☆                     | 8           |
| Tsan, 2012 <sup>31</sup>     | ☆                                        | ☆                                   | ☆                         | ☆                                    | ☆                            | ☆                     | ☆                     | ☆                     | 8           |
| Tsan, 2013 <sup>32</sup>     | ☆                                        | ☆                                   | ☆                         | ☆                                    | ☆                            | ☆                     | ☆                     | ☆                     | 8           |

  

| Case–Control Studies             | Selection                    |                             |                       | Comparability          |                              |                           | Exposure                           |                   | Total Score |
|----------------------------------|------------------------------|-----------------------------|-----------------------|------------------------|------------------------------|---------------------------|------------------------------------|-------------------|-------------|
|                                  | Adequate definition of cases | Representativeness of cases | Selection of controls | Definition of controls | Control for important factor | Ascertainment of Exposure | Same method for cases and controls | Non-response rate |             |
| Khurana, 2005 <sup>33</sup>      | -                            | ☆                           | ☆                     | ☆                      | ☆                            | ☆                         | ☆                                  | -                 | 6           |
| El-Serag, 2009 <sup>34</sup>     | -                            | ☆                           | ☆                     | ☆                      | ☆☆                           | ☆                         | ☆                                  | -                 | 7           |
| Chiu, 2011 <sup>35</sup>         | -                            | ☆                           | ☆                     | ☆                      | ☆☆                           | ☆                         | ☆                                  | -                 | 7           |
| Lai, 2013 <sup>36</sup>          | -                            | ☆                           | ☆                     | ☆                      | ☆☆                           | ☆                         | ☆                                  | -                 | 7           |
| Leung, 2013 <sup>37</sup>        | ☆                            | ☆                           | ☆                     | ☆                      | ☆                            | ☆                         | ☆                                  | ☆                 | 8           |
| Chaiteerakij, 2013 <sup>38</sup> | -                            | ☆                           | -                     | ☆                      | ☆                            | ☆                         | ☆                                  | -                 | 5           |

Control for important factor: ☆ Reported relative risk have been adjusted for at least 4 of 7 important factors: HBV infection, HCV infection, cirrhosis, NAFLD, HCV treatment, HBV treatment, anti-diabetic medications; ☆ Study controls for any additional factor. Assessment of outcome: ☆ record linkage. Follow-up long enough: ☆ follow up period  $\geq 4$  years. Adequate definition of cases: ☆ The case is defined with independent validation. Non-response rate: ☆ Same rate for both groups.

1  
2  
3  
4  
5  
6  
7  
8  
9  
10  
11  
12  
13  
14  
15  
16  
17  
18  
19  
20  
21  
22  
23  
24  
25  
26  
27  
28  
29  
30  
31  
32  
33  
34  
35  
36  
37  
38  
39  
40  
41  
42  
43  
44  
45  
46  
47

**Supplementary Table 2.** Studies reporting RR for use of lipophilic or hydrophilia statins, and for higher cumulative dosage of statin use

| Studies                           | Measurements of effect estimates | Statins type         | Dosage/Duration of Statin use | Crude RR with 95% CIs | Adjusted RR with 95% CIs |
|-----------------------------------|----------------------------------|----------------------|-------------------------------|-----------------------|--------------------------|
| Tsan, 2012, Taiwan <sup>31</sup>  | HR                               | A, F, L, P, R, and S | >365 cDDD                     | 0.50 (0.26-0.96)      | 0.34 (0.33-0.59)         |
|                                   | HR                               | Lipophilia statin    | ≥28 cDDD                      | 0.62 (0.47-0.83)      | 0.44 (0.33-0.59)         |
|                                   | HR                               | Hydrophilia statin   | ≥28 cDDD                      | 0.65 (0.39 -1.09)     | 0.51 (0.31-0.85)         |
| Tsan, 2013, Taiwan <sup>32</sup>  | HR                               | A, F, L, P, R, and S | >180 cDDD                     | NA                    | 0.33 (0.25–0.42)         |
| El-Serag, 2009, USA <sup>34</sup> | OR                               | Simvastatin          | 1.6 years (M)                 | 0.47 (0.41- 0.54)     | 0.64 (0.55-0.75)         |
|                                   | OR                               | A, F, L, P, R, and S | >215.4 cDDD                   | 0.47 (0.30-0.72)      | 0.63 (0.37-1.06)         |
| Chiu, 2011, Taiwan <sup>35</sup>  | OR                               | Lipophilia statin    | ≥ 1 cDDD                      | NA                    | 0.56 (0.45–0.69)*        |
|                                   | OR                               | Hydrophilia statin   | ≥ 1 cDDD                      | NA                    | 0.46 (0.29–0.71)*        |
|                                   | OR                               | Lipophilia statin    | ≥1 Rx                         | 0.54 (0.48–0.61)*     | 0.67 (0.57–0.79)*        |
| Lai, 2013, Taiwan <sup>36</sup>   | OR                               | Hydrophilia statin   | ≥1 Rx                         | 0.63 (0.47–0.83)*     | 0.80 (0.55–1.16)*        |

The RR with an asterisk mark (\*) was calculated based on the raw data in the original study. The others, crude or adjusted, were extracted from the original paper.

**Supplementary Table 3.** Published studies of the total cholesterol and the risk of liver cancer

| Studies                             | Study design                                                                                | cases/<br>participants | Follow-up  | Reference<br>(mg/dL) | Index (mg/dL) | Adjusted HR (95% CIs) |                   | P for trend*                   | Confounders for<br>adjustment |
|-------------------------------------|---------------------------------------------------------------------------------------------|------------------------|------------|----------------------|---------------|-----------------------|-------------------|--------------------------------|-------------------------------|
|                                     |                                                                                             |                        |            |                      |               | Men                   | Women             |                                |                               |
| Iso, 2009, Japan <sup>43</sup>      | Population-based cohort<br>(JPHC Study)                                                     | 125 /33,368            | 12.4 years | 180–199              | <160          | 2.62 (1.44–4.76)      | 4.15 (1.70–10.16) | Men < 0.0001<br>Women < 0.0001 | 1-10                          |
|                                     |                                                                                             |                        |            |                      | 160–179       | 1.04 (0.52–2.07)      | 1.99 (0.82–4.85)  |                                |                               |
|                                     |                                                                                             |                        |            |                      | 180–199       | 1                     | 1                 |                                |                               |
|                                     |                                                                                             |                        |            |                      | 200–219       | 0.56 (0.24–1.28)      | 1.09 (0.44–2.68)  |                                |                               |
|                                     |                                                                                             |                        |            |                      | 200–239       | 0.49 (0.16–1.44)      | 0.41 (0.11–1.52)  |                                |                               |
|                                     |                                                                                             |                        |            |                      | > 240         | -                     | 0.80 (0.28–2.27)  |                                |                               |
| Ahn, 2009, Finland <sup>42</sup>    | Placebo-controlled,<br>double-blinded primary<br>prevention trial in male<br>smokers (ATBC) | 191/29,093             | 18.0 years | < 203.9              | < 203.9       | 1                     | -                 | P=0.0007                       | 1-5, 11-17                    |
|                                     |                                                                                             |                        |            |                      | 203.9-227.6   | 0.69 (0.46-1.05)      | -                 |                                |                               |
|                                     |                                                                                             |                        |            |                      | 227.7-249.2   | 0.63 (0.41-0.97)      | -                 |                                |                               |
|                                     |                                                                                             |                        |            |                      | 249.3-276.6   | 0.56 (0.36-0.88)      | -                 |                                |                               |
|                                     |                                                                                             |                        |            |                      | > 276.7       | 0.66 (0.43-1.01)      | -                 |                                |                               |
| Kitahara, 2011, Korea <sup>44</sup> | Prospective study of Korean<br>men and women (Korean<br>NHIC)                               | 10,161/1,189,719       | 12.7 years | < 160                | < 160         | 1                     | -                 | Men < 0.001<br>Women < 0.001   | 2-5, 13, 18                   |
|                                     |                                                                                             |                        |            |                      | 160-179       | 0.69 (0.65-0.74)      | 0.63 (0.54-0.72)  |                                |                               |
|                                     |                                                                                             |                        |            |                      | 180-199       | 0.62 (0.58-0.66)      | 0.50 (0.44-0.58)  |                                |                               |
|                                     |                                                                                             |                        |            |                      | 200-239       | 0.48 (0.45-0.51)      | 0.37(0.32-0.42)   |                                |                               |
|                                     |                                                                                             |                        |            |                      | ≥ 240         | 0.42 (0.38-0.45)      | 0.32 (0.27-0.39)  |                                |                               |

JPHC Study = The Japan Public Health Center-based Prospective Study, ATBC = The Alpha-Tocopherol, Beta-Carotene Cancer Prevention Study, Korean NHIC = The Korean National Health Insurance Corporation Medical Evaluation. \*Tests for linear trend were conducted by treating the total cholesterol as a continuous variable in the multivariable models. Confounders for adjustment: 1 = age, 2 = BMI, 3 = smoking, 4 = ethanol intake, 5 = hypertension, 6 = diabetes, 7 = hyperlipidemia medication use, 8 = total vegetable intake, 9 = coffee intake, 10 = public health center, 11 = intervention, 12 = level of education, 13 = physical activity, 14 = Saturated fat intake, 15 = polyunsaturated fat intake, 16 = total calorie, 17 = serum HDL cholesterol, 18 = fasting serum glucose.



**Supplementary Table 4.** Published trials of statin use as adjuvant in treatment of liver cancer

| Studies                                | Study design                                  | Patients population                                             | Intervention                                   | Control                                         | Overall survival of intervention (months) | Overall survival of control (months)                                | Kaplan-Meier and log-rank test            |
|----------------------------------------|-----------------------------------------------|-----------------------------------------------------------------|------------------------------------------------|-------------------------------------------------|-------------------------------------------|---------------------------------------------------------------------|-------------------------------------------|
| Kawata, 2001, Japan <sup>49</sup>      | Prospective, randomized, open label study     | Patients with advanced liver cancer after TAE procedure, n = 83 | Pravastatin 20-40 mg + 5-FU 200 mg QD, n = 41  | 5-FU 200 mg QD, n = 42                          | Median 18                                 | Median 9                                                            | <i>P</i> = 0.006                          |
| Lersch, 2004, Germany <sup>50</sup>    | Prospective study                             | Patients with advanced liver cancer, n = 58                     | Pravastatin 40-80 mg QD, n = 20                | A: Octreotide, n = 30;<br>B: Gemcitabine, n = 8 | Median 7.2<br>(95% CIs 2.9-11.5)          | A: Median 5(95% CIs 2.2-7.8);<br>B: Median 3.5<br>(95% CIs 2.2-4.9) | A: <i>P</i> = 0.09;<br>B: <i>P</i> = 0.03 |
| Graf, 2008, Germany <sup>51</sup>      | Prospective, non-randomized, open label study | Patients with advanced liver cancer after TACE, n = 183         | Pravastatin 20-40 mg QD, n = 52                | No treatment, n = 131                           | Median 20.9<br>(95% CIs 15.5-26.3)        | Median 20.9<br>(95% CIs 15.5-26.3)                                  | <i>P</i> = 0.003                          |
| Georgescu, 2011, Romania <sup>52</sup> | Prospective, randomized, open label study     | Patients with advanced liver cancer, n = 72                     | Lovastatin 40 mg + Sorafenib 400 mg QD, n = 39 | Sorafenib 400 mg QD, n = 33                     | Mean 12.15±0.76                           | Mean 10.85±0.82                                                     | Non-significant                           |

TAE = Transcatheter Arterial Embolization; TACE = Transhepatic Arterial Chemotherapy and Embolization).

**Supplementary Table 5.** Ongoing clinical trials of statin use as adjuvant in treatment of liver cancer

| Studies          | Year | Location | Phase | Study design                                                                 | Condition                                | Intervention                                                                                       | Control                           | Estimated Enrollment | Resist number                       | Status     |
|------------------|------|----------|-------|------------------------------------------------------------------------------|------------------------------------------|----------------------------------------------------------------------------------------------------|-----------------------------------|----------------------|-------------------------------------|------------|
| ESTAHEP-2010     | 2011 | Spain    | II    | Multicenter, prospective, randomized, double-blind, placebo-controlled study | Advanced liver cancer                    | Sorafenib 400 mg BID + Pravastatin 40 mg, QD                                                       | Sorafenib 400 mg BID + placebo QD | 216                  | NCT01418729; EUCTR2010-024421-21-ES | Recruiting |
| PRODIGE 21       | 2011 | France   | II    | Multicenter, prospective, randomized, open label study                       | Liver cancer with Child-Pugh B Cirrhosis | A: Sorafenib 400 mg BID; B: Pravastatin 40 mg, QD; C: Sorafenib 400 mg BID + Pravastatin 40 mg, QD | Best supportive care              | 160                  | NCT01357486                         | Recruiting |
| JOUVE PHRCK 2009 | 2013 | France   | III   | prospective, randomized, open label study                                    | Liver cancer with Child-Pugh A Cirrhosis | Sorafenib 800 mg BID + Pravastatin 40 mg, QD                                                       | Sorafenib 800 mg BID              | 474                  | NCT01903694; NCT01075555            | Recruiting |



# PRISMA 2009 Checklist

1  
2  
3  
4  
5  
6  
7  
8  
9  
10  
11  
12  
13  
14  
15  
16  
17  
18  
19  
20  
21  
22  
23  
24  
25  
26  
27  
28  
29  
30  
31  
32  
33  
34  
35  
36  
37  
38  
39  
40  
41  
42  
43  
44  
45  
46  
47  
48  
49

| Section/topic                      | #  | Checklist item                                                                                                                                                                                                                                                                                              | Reported on page # |
|------------------------------------|----|-------------------------------------------------------------------------------------------------------------------------------------------------------------------------------------------------------------------------------------------------------------------------------------------------------------|--------------------|
| <b>TITLE</b>                       |    |                                                                                                                                                                                                                                                                                                             |                    |
| Title                              | 1  | Identify the report as a systematic review, meta-analysis, or both.                                                                                                                                                                                                                                         | 1                  |
| <b>ABSTRACT</b>                    |    |                                                                                                                                                                                                                                                                                                             |                    |
| Structured summary                 | 2  | Provide a structured summary including, as applicable: background; objectives; data sources; study eligibility criteria, participants, and interventions; study appraisal and synthesis methods; results; limitations; conclusions and implications of key findings; systematic review registration number. | 2                  |
| <b>INTRODUCTION</b>                |    |                                                                                                                                                                                                                                                                                                             |                    |
| Rationale                          | 3  | Describe the rationale for the review in the context of what is already known.                                                                                                                                                                                                                              | 4                  |
| Objectives                         | 4  | Provide an explicit statement of questions being addressed with reference to participants, interventions, comparisons, outcomes, and study design (PICOS).                                                                                                                                                  | 5                  |
| <b>METHODS</b>                     |    |                                                                                                                                                                                                                                                                                                             |                    |
| Protocol and registration          | 5  | Indicate if a review protocol exists, if and where it can be accessed (e.g., Web address), and, if available, provide registration information including registration number.                                                                                                                               | no                 |
| Eligibility criteria               | 6  | Specify study characteristics (e.g., PICOS, length of follow-up) and report characteristics (e.g., years considered, language, publication status) used as criteria for eligibility, giving rationale.                                                                                                      | 6                  |
| Information sources                | 7  | Describe all information sources (e.g., databases with dates of coverage, contact with study authors to identify additional studies) in the search and date last searched.                                                                                                                                  | 5                  |
| Search                             | 8  | Present full electronic search strategy for at least one database, including any limits used, such that it could be repeated.                                                                                                                                                                               | 5                  |
| Study selection                    | 9  | State the process for selecting studies (i.e., screening, eligibility, included in systematic review, and, if applicable, included in the meta-analysis).                                                                                                                                                   | 6                  |
| Data collection process            | 10 | Describe method of data extraction from reports (e.g., piloted forms, independently, in duplicate) and any processes for obtaining and confirming data from investigators.                                                                                                                                  | 6-7                |
| Data items                         | 11 | List and define all variables for which data were sought (e.g., PICOS, funding sources) and any assumptions and simplifications made.                                                                                                                                                                       | 6-7                |
| Risk of bias in individual studies | 12 | Describe methods used for assessing risk of bias of individual studies (including specification of whether this was done at the study or outcome level), and how this information is to be used in any data synthesis.                                                                                      | 7                  |
| Summary measures                   | 13 | State the principal summary measures (e.g., risk ratio, difference in means).                                                                                                                                                                                                                               | 7                  |
| Synthesis of results               | 14 | Describe the methods of handling data and combining results of studies, if done, including measures of consistency (e.g., $I^2$ for each meta-analysis).                                                                                                                                                    | 7                  |

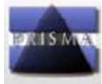

# PRISMA 2009 Checklist

Page 1 of 2

| Section/topic                 | #  | Checklist item                                                                                                                                                                                           | Reported on page # |
|-------------------------------|----|----------------------------------------------------------------------------------------------------------------------------------------------------------------------------------------------------------|--------------------|
| Risk of bias across studies   | 15 | Specify any assessment of risk of bias that may affect the cumulative evidence (e.g., publication bias, selective reporting within studies).                                                             | 8                  |
| Additional analyses           | 16 | Describe methods of additional analyses (e.g., sensitivity or subgroup analyses, meta-regression), if done, indicating which were pre-specified.                                                         | 8                  |
| <b>RESULTS</b>                |    |                                                                                                                                                                                                          |                    |
| Study selection               | 17 | Give numbers of studies screened, assessed for eligibility, and included in the review, with reasons for exclusions at each stage, ideally with a flow diagram.                                          | 8                  |
| Study characteristics         | 18 | For each study, present characteristics for which data were extracted (e.g., study size, PICOS, follow-up period) and provide the citations.                                                             | 9 Table1,2         |
| Risk of bias within studies   | 19 | Present data on risk of bias of each study and, if available, any outcome level assessment (see item 12).                                                                                                | 10, Suppl. Table 1 |
| Results of individual studies | 20 | For all outcomes considered (benefits or harms), present, for each study: (a) simple summary data for each intervention group (b) effect estimates and confidence intervals, ideally with a forest plot. | Figure 2           |
| Synthesis of results          | 21 | Present results of each meta-analysis done, including confidence intervals and measures of consistency.                                                                                                  | 10                 |
| Risk of bias across studies   | 22 | Present results of any assessment of risk of bias across studies (see Item 15).                                                                                                                          | 10                 |
| Additional analysis           | 23 | Give results of additional analyses, if done (e.g., sensitivity or subgroup analyses, meta-regression [see Item 16]).                                                                                    | 10-12              |
| <b>DISCUSSION</b>             |    |                                                                                                                                                                                                          |                    |
| Summary of evidence           | 24 | Summarize the main findings including the strength of evidence for each main outcome; consider their relevance to key groups (e.g., healthcare providers, users, and policy makers).                     | 12-13              |
| Limitations                   | 25 | Discuss limitations at study and outcome level (e.g., risk of bias), and at review-level (e.g., incomplete retrieval of identified research, reporting bias).                                            | 13-14              |
| Conclusions                   | 26 | Provide a general interpretation of the results in the context of other evidence, and implications for future research.                                                                                  | 15-16              |
| <b>FUNDING</b>                |    |                                                                                                                                                                                                          |                    |
| Funding                       | 27 | Describe sources of funding for the systematic review and other support (e.g., supply of data); role of funders for the systematic review.                                                               | NA                 |

From: Moher D, Liberati A, Tetzlaff J, Altman DG, The PRISMA Group (2009). Preferred Reporting Items for Systematic Reviews and Meta-Analyses: The PRISMA Statement. PLoS Med 6(6): e1000097. doi:10.1371/journal.pmed1000097

For more information, visit: [www.prisma-statement.org](http://www.prisma-statement.org).

For peer review only - <http://bmjopen.bmj.com/site/about/guidelines.xhtml>
